# Supplementary material for: Unravelling the Complex Interplay of Transcription Factors Orchestrating Seed Oil Content in Brassica napus L
Source: Int J Mol Sci. 2021 Jan 21;22(3):1033. doi: 10.3390/ijms22031033 (PMC7864344; doi:10.3390/ijms22031033)
Supplement: Supplementary file 1 [file ijms-22-01033-s001.zip]

Archive with 7 entries (7 files):
- Figure S1_zs_11_inc_BP_revigo_treemap-page-001.png
- Figure S2_zs_11_dec_BP_revigo_treemap-page-001.png
- Figure S3_ZY821_INC_BP_revigo_treemap-page-001.png
- Figure S4_ zy821_dec_BP_revigo_treemap-page-001.png
- SupplemetaryInformation.pdf
- TableS1_List of MEGs for ZS11 and ZY821.xlsx
- TableS2_Gene Ontology terms for MEG sets_Brassica napus.xlsx
