# Supplementary material for: Unravelling the Complex Interplay of Transcription Factors Orchestrating Seed Oil Content in Brassica napus L
Source: Int J Mol Sci. 2021 Jan 21;22(3):1033. doi: 10.3390/ijms22031033 (PMC7864344; doi:10.3390/ijms22031033)
Supplement: Supplementary file 1 [file ijms-22-01033-s001.zip › TableS1_List of MEGs for ZS11 and ZY821.xlsx]

## Sheet: Sheet1
ZS11	ZS11		ZY821	ZY821
Ascending MEGs	Descending MEGs		Ascending MEGs	Descending MEGs
BnaA01g01320D	BnaA02g15380D		BnaC03g12980D	BnaA09g10560D
BnaA01g16410D	BnaA02g18730D		BnaC08g45960D	BnaA02g01290D
BnaA01g17020D	BnaA03g08740D		BnaC03g03680D	BnaA03g04560D
BnaA01g20940D	BnaA03g36450D		BnaA03g51280D	BnaC02g28200D
BnaA01g29480D	BnaA05g01740D		BnaC02g27190D	BnaA03g18780D
BnaA01g31420D	BnaA06g37080D		BnaC01g30380D	BnaA06g29770D
BnaA01g33590D	BnaC01g14130D		BnaA05g25600D	BnaC04g39840D
BnaA02g00570D	BnaC01g34520D		BnaC03g23680D	BnaC04g40700D
BnaA02g18350D	BnaC02g11400D		BnaC07g29630D	BnaC06g08090D
BnaA02g20920D	BnaC03g06010D		BnaC09g40450D	BnaC07g32700D
BnaA02g27060D	BnaC03g48270D		BnaA07g21930D	BnaA06g03970D
BnaA03g03400D	BnaC03g62970D		BnaC06g38680D	BnaA10g13850D
BnaA03g16980D	BnaC04g00760D		BnaC04g33390D	BnaC09g19490D
BnaA03g25570D	BnaC04g17360D		BnaC05g15560D	BnaA05g30270D
BnaA03g29510D	BnaC05g05960D		BnaA04g13560D	BnaA02g10210D
BnaA03g32980D	BnaC06g23590D		BnaC06g35330D	BnaA06g18500D
BnaA03g33460D	BnaC07g32690D		BnaA06g17810D	BnaC08g15370D
BnaA03g37340D	BnaC08g17520D		BnaA03g07120D	BnaC04g01790D
BnaA03g38310D	BnaC08g32980D		BnaA03g33690D	BnaA10g24640D
BnaA03g46390D	BnaA01g02870D		BnaC05g13810D	BnaA06g04700D
BnaA03g48460D	BnaA02g15890D		BnaC07g06710D	BnaC07g36420D
BnaA04g12960D	BnaA02g15900D		BnaA08g14610D	BnaC04g34790D
BnaA04g19480D	BnaC01g05710D		BnaC01g04750D	BnaC02g17170D
BnaA04g25500D	BnaC01g18640D		BnaC07g32860D	BnaC04g47760D
BnaA05g06010D	BnaC01g32590D		BnaA01g31310D	BnaC08g21100D
BnaA05g16430D	BnaC07g29170D		BnaA04g14720D	BnaA04g21370D
BnaA05g18960D	BnaC07g46670D		BnaA07g18830D	BnaA07g33760D
BnaA06g02440D	BnaA02g19670D		BnaA08g03890D	BnaC05g07840D
BnaA06g03320D	BnaA06g06510D		BnaA09g48370D	BnaC01g25440D
BnaA06g11870D	BnaA06g31710D		BnaA03g42200D	BnaC03g40030D
BnaA06g18650D	BnaA06g36090D		BnaC08g16450D	BnaC06g39700D
BnaA06g26660D	BnaA09g05550D		BnaA09g11430D	BnaA06g11470D
BnaA06g35260D	BnaC03g17140D		BnaC01g03620D	BnaA08g13550D
BnaA07g07400D	BnaC05g45560D		BnaC02g23110D	BnaA05g17080D
BnaA07g09700D	BnaA04g24690D		BnaC05g34110D	BnaC01g35170D
BnaA07g10290D	BnaC04g01640D		BnaA02g15440D	BnaC09g32560D
BnaA07g14160D	BnaC04g44140D		BnaC08g43480D	BnaA10g20370D
BnaA07g14750D	BnaC05g03760D		BnaC01g38640D	BnaA10g23230D
BnaA07g15160D	BnaC07g23630D		BnaC02g16410D	BnaC07g31130D
BnaA07g22030D	BnaC08g41990D		BnaC01g09450D	BnaA01g04700D
BnaA07g23830D	BnaA01g12020D		BnaA01g31220D	BnaA01g16950D
BnaA07g23890D	BnaC04g31220D		BnaC09g43050D	BnaA03g26950D
BnaA07g25840D	BnaC06g12460D		BnaA07g33670D	BnaA05g08560D
BnaA07g27740D	BnaC07g03940D		BnaA01g06400D	BnaC04g46570D
BnaA07g30250D	BnaC09g00700D		BnaA05g04910D	BnaC08g20020D
BnaA07g34700D	BnaA02g05180D		BnaC09g39280D	BnaA07g09530D
BnaA07g35690D	BnaA03g18300D		BnaC09g46250D	BnaC06g12230D
BnaA07g35910D	BnaA03g25280D		BnaC05g22980D	BnaC01g29280D
BnaA08g00610D	BnaA07g05250D		BnaC01g21180D	BnaC06g29080D
BnaA08g11120D	BnaA09g30620D		BnaC09g29280D	BnaA01g09290D
BnaA08g14470D	BnaC01g03200D		BnaA04g24470D	BnaA07g14530D
BnaA09g03080D	BnaC03g21530D		BnaA03g00200D	BnaC03g41570D
BnaA09g04020D	BnaC03g69050D		BnaC01g13140D	BnaC04g00770D
BnaA09g09540D	BnaC09g02800D		BnaC08g15320D	BnaA06g08120D
BnaA09g10350D	BnaC09g12400D		BnaA06g06950D	BnaA07g21460D
BnaA09g10730D	BnaC09g22980D		BnaC02g13310D	BnaC03g16860D
BnaA09g11270D	BnaA01g14030D		BnaC04g47940D	BnaC04g47970D
BnaA09g12150D	BnaA03g18020D		BnaA01g01610D	BnaA10g23090D
BnaA09g14060D	BnaA07g18970D		BnaC02g17600D	BnaC04g05640D
BnaA09g23310D	BnaC02g27150D		BnaC07g18850D	BnaC09g29640D
BnaA09g27320D	BnaC04g12390D		BnaA06g36120D	BnaA01g15430D
BnaA09g28270D	BnaC04g18110D		BnaA06g23990D	BnaC03g34850D
BnaA09g31240D	BnaC04g29380D		BnaA07g26090D	BnaC04g51480D
BnaA09g31350D	BnaC07g16300D		BnaA04g10140D	BnaA02g31600D
BnaA09g39150D	BnaC08g15770D		BnaA09g04900D	BnaA03g09500D
BnaA09g39500D	BnaA05g19520D		BnaA10g04020D	BnaA03g27380D
BnaA09g41850D	BnaA09g19090D		BnaC02g23260D	BnaC04g07470D
BnaA10g04140D	BnaA10g21390D		BnaC04g02860D	BnaA03g33050D
BnaC01g07480D	BnaC01g37240D		BnaA01g12810D	BnaA06g33110D
BnaC01g16080D	BnaC04g20570D		BnaA05g12700D	BnaA08g10110D
BnaC01g16460D	BnaA03g15090D		BnaA06g20980D	BnaC06g27960D
BnaC01g18470D	BnaA03g40890D		BnaA10g19390D	BnaC08g06430D
BnaC01g19200D	BnaA07g26830D		BnaA02g25030D	BnaA02g08190D
BnaC01g23420D	BnaA09g17730D		BnaC08g02320D	BnaA07g19330D
BnaC01g25730D	BnaA09g46500D		BnaA06g34120D	BnaC06g31340D
BnaC01g26360D	BnaA10g09880D		BnaC02g02720D	BnaC07g07110D
BnaC01g27380D	BnaC03g10210D		BnaC03g04790D	BnaA05g32910D
BnaC02g09610D	BnaC04g44020D		BnaC03g19950D	BnaC02g27250D
BnaC02g10580D	BnaC07g26530D		BnaA03g06240D	BnaC05g00780D
BnaC02g11990D	BnaA03g02340D		BnaA06g28830D	BnaC05g03720D
BnaC02g23290D	BnaA04g26390D		BnaA07g35110D	BnaC06g04620D
BnaC02g31360D	BnaA06g14160D		BnaC01g26820D	BnaA02g17310D
BnaC02g31370D	BnaA07g34340D		BnaC05g41330D	BnaA02g25070D
BnaC02g31720D	BnaC01g04710D		BnaA10g12250D	BnaA02g26480D
BnaC02g41070D	BnaC01g06550D		BnaC01g30650D	BnaA06g31630D
BnaC02g41600D	BnaC09g36710D		BnaC04g03820D	BnaA01g17390D
BnaC02g42620D	BnaA01g12930D		BnaC04g07190D	BnaC05g43990D
BnaC03g02930D	BnaA01g17760D		BnaC09g29130D	BnaC06g22970D
BnaC03g02940D	BnaA03g44000D		BnaA02g28000D	BnaC06g34160D
BnaC03g04000D	BnaA10g22000D		BnaA03g05140D	BnaC07g13800D
BnaC03g21860D	BnaA10g23500D		BnaA03g28190D	BnaA06g16310D
BnaC03g35210D	BnaC02g11920D		BnaA07g34740D	BnaA08g09390D
BnaC03g38390D	BnaC03g05650D		BnaA08g21560D	BnaA09g15080D
BnaC03g38480D	BnaC03g15920D		BnaA10g04520D	BnaC01g18550D
BnaC03g40330D	BnaC04g05580D		BnaA10g17920D	BnaC03g61420D
BnaC03g43080D	BnaA04g20140D		BnaA10g23830D	BnaC07g28900D
BnaC03g49540D	BnaA07g12050D		BnaC08g04130D	BnaA07g23680D
BnaC03g49980D	BnaA09g01540D		BnaC09g00340D	BnaA07g27960D
BnaC03g53860D	BnaC02g27050D		BnaC09g01630D	BnaA10g02340D
BnaC03g62120D	BnaC03g29720D		BnaA01g13370D	BnaC05g11240D
BnaC04g00950D	BnaC07g25390D		BnaA01g17440D	BnaC05g19800D
BnaC04g05640D	BnaC07g33580D		BnaA04g23670D	BnaA03g19190D
BnaC04g08710D	BnaA01g33500D		BnaC01g18690D	BnaA07g11700D
BnaC04g08740D	BnaA02g31890D		BnaC01g38490D	BnaA07g20710D
BnaC04g12010D	BnaA09g35210D		BnaC02g33340D	BnaA07g25460D
BnaC04g12770D	BnaC02g00370D		BnaC03g01250D	BnaC03g51000D
BnaC04g15360D	BnaA03g35880D		BnaC03g10600D	BnaC05g31990D
BnaC04g38780D	BnaA07g24780D		BnaC04g04430D	BnaC06g39590D
BnaC04g39340D	BnaC04g13380D		BnaC07g12710D	BnaA03g18770D
BnaC04g48590D	BnaC04g33860D		BnaA01g22130D	BnaA09g42070D
BnaC04g49350D	BnaC06g36400D		BnaA03g07910D	BnaC02g42820D
BnaC05g04030D	BnaA03g53210D		BnaA09g50870D	BnaC03g49580D
BnaC05g05140D	BnaC09g24050D		BnaA10g12080D	BnaC04g28370D
BnaC05g15930D	BnaA01g08320D		BnaC03g37060D	BnaC05g31560D
BnaC05g18990D	BnaA03g22180D		BnaC05g44860D	BnaC07g47120D
BnaC05g22760D	BnaA06g14020D		BnaC05g46790D	BnaA01g25900D
BnaC05g25210D	BnaA06g18550D		BnaA05g28010D	BnaA03g46700D
BnaC05g38940D	BnaA07g10870D		BnaA10g14490D	BnaA07g16240D
BnaC05g40350D	BnaC03g34970D		BnaC01g17510D	BnaA08g08560D
BnaC05g48710D	BnaA02g02130D		BnaC05g46960D	BnaC08g31570D
BnaC05g48840D	BnaA04g26130D		BnaC07g06160D	BnaA01g02840D
BnaC06g02760D	BnaC01g33310D		BnaC08g04600D	BnaC02g27150D
BnaC06g12230D	BnaC03g48950D		BnaC09g30690D	BnaC03g61130D
BnaC06g14900D	BnaA03g07910D		BnaA05g24410D	BnaC04g16440D
BnaC06g40220D	BnaA05g30720D		BnaA06g17940D	BnaA01g17120D
BnaC07g01790D	BnaA06g23810D		BnaA08g00830D	BnaA03g04510D
BnaC07g06760D	BnaA10g07850D		BnaA10g10710D	BnaA07g05100D
BnaC07g08610D	BnaC02g03880D		BnaC03g68330D	BnaC03g39930D
BnaC07g15890D	BnaC03g03390D		BnaC04g41330D	BnaC05g09930D
BnaC07g27140D	BnaC06g15100D		BnaC08g33450D	BnaC05g35180D
BnaC07g43740D	BnaA02g28730D		BnaA02g14950D	BnaC08g21200D
BnaC08g03220D	BnaA06g13830D		BnaA05g34140D	BnaC09g42440D
BnaC08g04000D	BnaC02g05680D		BnaA06g29100D	BnaA01g13980D
BnaC08g05280D	BnaC02g41710D		BnaA08g19490D	BnaA01g28330D
BnaC08g14620D	BnaC03g18120D		BnaA10g01440D	BnaA05g32490D
BnaC08g21970D	BnaC04g03750D		BnaC03g31720D	BnaA07g34210D
BnaC08g22780D	BnaC04g16850D		BnaC03g55570D	BnaA08g08620D
BnaC08g44160D	BnaC06g16270D		BnaC09g23900D	BnaA10g18420D
BnaC08g44170D	BnaC07g35110D		BnaC09g28910D	BnaC02g28720D
BnaC09g16040D	BnaC08g00150D		BnaA06g24010D	BnaC02g42530D
BnaC09g18440D	BnaC08g20830D		BnaA09g29200D	BnaC03g05990D
BnaC09g19060D	BnaA05g24640D		BnaC02g07170D	BnaC03g25940D
BnaC09g24440D	BnaA10g19350D		BnaC02g13280D	BnaC04g17600D
BnaC09g34570D	BnaC03g64890D		BnaA01g26060D	BnaA06g20920D
BnaC09g39000D	BnaC05g45440D		BnaA02g04480D	BnaC01g04090D
BnaC09g45170D	BnaC07g30680D		BnaA02g15220D	BnaC04g31550D
BnaC09g48030D	BnaC09g00050D		BnaA03g19160D	BnaC05g36320D
BnaC09g48820D	BnaA04g22830D		BnaA03g46990D	BnaC07g45080D
BnaC09g49510D	BnaA06g21960D		BnaA09g41870D	BnaC01g15360D
BnaA01g03370D	BnaA09g20640D		BnaC01g18190D	BnaC03g63940D
BnaA01g04490D	BnaC02g03640D		BnaC03g01360D	BnaC03g64760D
BnaA01g13770D	BnaC03g00600D		BnaC03g46980D	BnaC03g66050D
BnaA01g20830D	BnaC06g28810D		BnaC03g53280D	BnaC06g18720D
BnaA01g33600D	BnaA02g01050D		BnaC04g16010D	BnaC06g26720D
BnaA02g15920D	BnaA07g00520D		BnaC04g17540D	BnaC08g01230D
BnaA02g16980D	BnaA08g28670D		BnaC05g11210D	BnaC09g15160D
BnaA02g19210D	BnaA09g30170D		BnaC05g14260D	BnaA06g26960D
BnaA02g20860D	BnaC05g44370D		BnaC09g19830D	BnaA09g45800D
BnaA02g28210D	BnaC07g16190D		BnaC09g42350D	BnaC01g02180D
BnaA03g01730D	BnaA01g12560D		BnaA03g53680D	BnaC03g14810D
BnaA03g03250D	BnaA05g26700D		BnaA04g13260D	BnaC06g11290D
BnaA03g23800D	BnaA07g15810D		BnaA06g21900D	BnaC09g26320D
BnaA03g31390D	BnaA09g09670D		BnaC03g35540D	BnaA04g08400D
BnaA03g31660D	BnaA09g46560D		BnaC08g30880D	BnaA08g23970D
BnaA03g54420D	BnaC01g26030D		BnaC08g42290D	BnaC01g20510D
BnaA04g12070D	BnaC03g19500D		BnaC09g01970D	BnaC01g32870D
BnaA04g14690D	BnaC04g44970D		BnaA03g34550D	BnaC02g31430D
BnaA04g16300D	BnaC06g07830D		BnaA03g47440D	BnaC04g00900D
BnaA04g22670D	BnaC07g31010D		BnaA05g31240D	BnaC04g39360D
BnaA05g12260D	BnaC09g39680D		BnaA08g09640D	BnaC05g46610D
BnaA05g15480D	BnaA09g05420D		BnaA10g07210D	BnaC06g39560D
BnaA05g27080D	BnaA10g00110D		BnaC01g27300D	BnaC07g30460D
BnaA06g18660D	BnaA10g13790D		BnaC02g03540D	BnaC08g03210D
BnaA06g26650D	BnaC02g38820D		BnaC08g30160D	BnaA02g25060D
BnaA07g03530D	BnaC04g17820D		BnaA06g14760D	BnaA07g08950D
BnaA07g06520D	BnaC09g04950D		BnaC01g34020D	BnaC03g29280D
BnaA07g14170D	BnaA07g04490D		BnaC02g38890D	BnaC03g50490D
BnaA07g14190D	BnaC01g14350D		BnaC03g25410D	BnaC04g23800D
BnaA07g17130D	BnaC01g25860D		BnaC04g33060D	BnaC07g47540D
BnaA07g22580D	BnaC03g46250D		BnaC07g07750D	BnaC09g44820D
BnaA07g23600D	BnaC04g38970D		BnaC07g15590D	BnaA02g22150D
BnaA08g00690D	BnaC04g46310D		BnaC07g38110D	BnaA02g31590D
BnaA08g01490D	BnaC08g42440D		BnaC08g08470D	BnaA03g54400D
BnaA08g01580D	BnaA04g18110D		BnaC09g01430D	BnaC03g50940D
BnaA08g11530D	BnaA07g12120D		BnaA03g30570D	BnaC06g21860D
BnaA08g19160D	BnaA08g26170D		BnaA06g27600D	BnaC08g22570D
BnaA08g20550D	BnaA09g42520D		BnaA09g29660D	BnaC08g31580D
BnaA09g14110D	BnaC01g01370D		BnaA10g26770D	BnaA04g25590D
BnaA09g28310D	BnaC04g49160D		BnaC01g07710D	BnaA06g09520D
BnaA09g35670D	BnaC06g34610D		BnaC01g12310D	BnaA09g02760D
BnaA09g40700D	BnaC08g13440D		BnaC02g04480D	BnaA09g29430D
BnaA09g47030D	BnaA02g08940D		BnaC02g13680D	BnaC01g29350D
BnaA09g48360D	BnaA02g20720D		BnaC04g36330D	BnaC03g00710D
BnaA09g50030D	BnaA05g30860D		BnaC05g28170D	BnaC07g01680D
BnaA10g05190D	BnaA10g27410D		BnaC06g02640D	BnaC07g19620D
BnaC01g29740D	BnaC04g33380D		BnaC07g43540D	BnaA01g24300D
BnaC01g40290D	BnaC06g27810D		BnaC09g19630D	BnaC03g70860D
BnaC02g16390D	BnaC09g09840D		BnaA01g01350D	BnaC04g31810D
BnaC02g16400D	BnaA04g23990D		BnaA06g13820D	BnaC07g00750D
BnaC02g33910D	BnaA05g29700D		BnaA08g18260D	BnaC07g07970D
BnaC03g10270D	BnaA09g00910D		BnaA10g07290D	BnaC07g36780D
BnaC03g21870D	BnaC09g00560D		BnaC01g04070D	BnaC08g13730D
BnaC03g25610D	BnaC09g01600D		BnaC02g01650D	BnaC09g28970D
BnaC03g30090D	BnaA02g20700D		BnaC02g12010D	BnaA03g53210D
BnaC03g40380D	BnaA05g13160D		BnaC02g40000D	BnaA06g29810D
BnaC03g43240D	BnaA07g24910D		BnaC03g07870D	BnaC01g13300D
BnaC03g57020D	BnaC02g38640D		BnaC03g54330D	BnaC02g41500D
BnaC03g66500D	BnaC05g48240D		BnaC03g61430D	BnaC03g16360D
BnaC03g69380D	BnaC07g31000D		BnaC09g02490D	BnaC03g44950D
BnaC04g02410D	BnaC08g18530D		BnaA03g03180D	BnaC06g18990D
BnaC04g05650D	BnaA02g06210D		BnaA08g21770D	BnaC06g32510D
BnaC04g06850D	BnaA03g11340D		BnaA08g25010D	BnaC09g24970D
BnaC04g11040D	BnaA06g04910D		BnaC01g19640D	BnaA01g16310D
BnaC04g12020D	BnaA06g30190D		BnaC01g31500D	BnaA03g00800D
BnaC04g17080D	BnaA07g02170D		BnaC02g33440D	BnaA03g47840D
BnaC04g30390D	BnaA07g16700D		BnaC03g09350D	BnaA07g06200D
BnaC04g34240D	BnaA07g28200D		BnaC03g36730D	BnaA07g16700D
BnaC04g39950D	BnaA09g28720D		BnaC04g21390D	BnaA07g34160D
BnaC04g46040D	BnaC07g07840D		BnaC05g45040D	BnaA10g16590D
BnaC05g07480D	BnaA05g02000D		BnaC06g03820D	BnaC05g02440D
BnaC05g16800D	BnaA08g09110D		BnaC06g35980D	BnaC07g20810D
BnaC05g20620D	BnaC03g34730D		BnaC09g48590D	BnaA01g16810D
BnaC05g23800D	BnaC03g51460D		BnaA01g11080D	BnaA05g25010D
BnaC05g24800D	BnaC07g05310D		BnaA08g27490D	BnaC03g22610D
BnaC05g27960D	BnaC07g31840D		BnaA09g05800D	BnaC04g44100D
BnaC05g28100D	BnaA01g03070D		BnaA09g21020D	BnaC04g49870D
BnaC05g37370D	BnaA08g25350D		BnaA09g24200D	BnaA01g26390D
BnaC05g48730D	BnaA10g23320D		BnaA10g21650D	BnaA07g25530D
BnaC06g05920D	BnaC04g51220D		BnaC02g01350D	BnaA09g26300D
BnaC06g20360D	BnaC05g20840D		BnaC05g17130D	BnaC01g08930D
BnaC06g26890D	BnaA02g02580D		BnaC06g21590D	BnaC01g19560D
BnaC06g38530D	BnaA02g32770D		BnaC08g08790D	BnaC03g13940D
BnaC06g40350D	BnaA07g27390D		BnaA05g24750D	BnaC05g18610D
BnaC07g04070D	BnaA07g33590D		BnaA07g12340D	BnaC05g31680D
BnaC07g04120D	BnaA08g00190D		BnaA09g02430D	BnaC06g04820D
BnaC07g29310D	BnaC04g45500D		BnaA10g20760D	BnaC08g14510D
BnaC07g31200D	BnaC05g12910D		BnaC01g29940D	BnaA01g02090D
BnaC07g37140D	BnaC08g18570D		BnaC01g31970D	BnaA01g12410D
BnaC07g39130D	BnaC08g24480D		BnaC02g00010D	BnaA01g33410D
BnaC08g02790D	BnaC08g35710D		BnaC02g02480D	BnaA03g07020D
BnaC08g07540D	BnaA01g22360D		BnaC02g12110D	BnaA03g54220D
BnaC08g38820D	BnaA02g08140D		BnaC03g26100D	BnaA05g23780D
BnaC08g39810D	BnaA03g10910D		BnaC03g33800D	BnaA07g15930D
BnaC08g40400D	BnaA04g16780D		BnaC04g10940D	BnaA08g11040D
BnaC08g44150D	BnaA06g36370D		BnaC04g50130D	BnaA08g20250D
BnaC08g44420D	BnaA09g12300D		BnaC05g28300D	BnaC08g03730D
BnaC08g44720D	BnaC03g46510D		BnaC06g35770D	BnaC08g30750D
BnaC08g44960D	BnaC04g26680D		BnaC07g05830D	BnaA01g06540D
BnaC08g45250D	BnaC05g06170D		BnaC08g39120D	BnaA05g19700D
BnaC08g45400D	BnaC06g26120D		BnaA03g25050D	BnaA06g18130D
BnaC09g11780D	BnaC06g33320D		BnaA05g04200D	BnaA06g36340D
BnaC09g24430D	BnaA03g30060D		BnaC01g28700D	BnaC02g36340D
BnaC09g40070D	BnaA04g23540D		BnaC02g01930D	BnaC03g12040D
BnaC09g42380D	BnaC05g46120D		BnaC03g11940D	BnaC05g45400D
BnaC09g42840D	BnaA03g39310D		BnaC04g30220D	BnaC07g46240D
BnaA01g03260D	BnaA03g53100D		BnaC09g48700D	BnaA03g20010D
BnaA01g26390D	BnaA08g27370D		BnaC09g49570D	BnaA03g31930D
BnaA01g26850D	BnaA09g34830D		BnaA02g00870D	BnaA04g18980D
BnaA01g27070D	BnaC02g35210D		BnaA04g16840D	BnaA04g20890D
BnaA02g07450D	BnaC03g14160D		BnaA05g04970D	BnaA05g02480D
BnaA02g32040D	BnaC09g14370D		BnaA08g18040D	BnaA05g20170D
BnaA03g39430D	BnaA01g02430D		BnaA10g09860D	BnaA09g46120D
BnaA03g45680D	BnaA01g07890D		BnaC01g03800D	BnaC01g10620D
BnaA03g48780D	BnaA02g04840D		BnaC01g06660D	BnaC01g17700D
BnaA03g51970D	BnaA03g06550D		BnaC03g04400D	BnaC04g22590D
BnaA03g52340D	BnaA03g15070D		BnaC03g15230D	BnaC04g26170D
BnaA04g05690D	BnaA07g09050D		BnaC03g56200D	BnaC05g43030D
BnaA04g19470D	BnaA07g28990D		BnaC08g00040D	BnaC06g21580D
BnaA04g23840D	BnaA09g43190D		BnaC08g23710D	BnaC08g26370D
BnaA07g10800D	BnaC01g12840D		BnaA01g06700D	BnaC08g33500D
BnaA07g18140D	BnaC02g24380D		BnaA03g20460D	BnaC08g41080D
BnaA07g22050D	BnaC03g06310D		BnaA10g23360D	BnaC09g32260D
BnaA07g32130D	BnaC03g24580D		BnaC01g35260D	BnaA01g08270D
BnaA08g13430D	BnaC06g26100D		BnaC02g07390D	BnaA01g28140D
BnaA09g30690D	BnaC07g33710D		BnaC02g26320D	BnaA02g09590D
BnaA09g43860D	BnaA03g48310D		BnaC02g39680D	BnaA03g27000D
BnaA10g07620D	BnaA04g04120D		BnaC03g07820D	BnaA05g18020D
BnaC01g11140D	BnaC01g16530D		BnaC06g05810D	BnaC01g33060D
BnaC03g04080D	BnaC09g24290D		BnaC07g15870D	BnaC03g15400D
BnaC03g09170D	BnaA02g01140D		BnaA01g13890D	BnaC04g21240D
BnaC03g31980D	BnaA04g10040D		BnaA02g10480D	BnaC05g38580D
BnaC03g34000D	BnaA05g15700D		BnaA02g18690D	BnaC06g13160D
BnaC03g41100D	BnaA09g39980D		BnaA03g29390D	BnaC06g15250D
BnaC03g56590D	BnaC07g34360D		BnaA04g18670D	BnaC07g22390D
BnaC03g64640D	BnaA01g15410D		BnaA04g20520D	BnaC07g24020D
BnaC04g12510D	BnaA02g05220D		BnaA05g23930D	BnaC09g29390D
BnaC04g38860D	BnaA03g42680D		BnaA06g02800D	BnaA03g20190D
BnaC04g49750D	BnaC03g02250D		BnaA06g08580D	BnaA03g37210D
BnaC05g04560D	BnaC03g10850D		BnaA07g16580D	BnaA03g40740D
BnaC05g06700D	BnaC05g17480D		BnaA08g22000D	BnaA04g11490D
BnaC05g41930D	BnaA01g11310D		BnaA09g41330D	BnaA05g00960D
BnaC05g48390D	BnaA03g18830D		BnaC03g20140D	BnaA06g14990D
BnaC05g48490D	BnaA04g09260D		BnaC04g21070D	BnaA09g30880D
BnaC05g48690D	BnaA10g27720D		BnaC04g44430D	BnaC01g02020D
BnaC06g11180D	BnaC02g42240D		BnaC06g40440D	BnaC02g40680D
BnaC06g18100D	BnaC03g08370D		BnaC08g07080D	BnaC03g36920D
BnaC07g02690D	BnaC06g06150D		BnaC09g02350D	BnaC06g27130D
BnaC07g07750D	BnaC07g29680D		BnaA01g07750D	BnaC07g30180D
BnaC07g15230D	BnaC09g45220D		BnaA02g02070D	BnaA01g08930D
BnaC07g37600D	BnaA02g10100D		BnaA04g11770D	BnaA02g09420D
BnaC08g01610D	BnaA06g28350D		BnaA05g08930D	BnaA03g51030D
BnaC08g37930D	BnaA08g26810D		BnaA06g05650D	BnaA08g23150D
BnaC09g06580D	BnaA09g07800D		BnaA08g23840D	BnaA09g48480D
BnaC09g24080D	BnaC01g04270D		BnaC01g23620D	BnaC01g11730D
BnaC09g30020D	BnaC01g04560D		BnaC05g15360D	BnaC01g15480D
BnaA01g24060D	BnaC03g02980D		BnaC05g47780D	BnaC01g38150D
BnaA02g17870D	BnaC03g26400D		BnaC06g37500D	BnaC02g42290D
BnaA02g33820D	BnaA02g32860D		BnaC08g25780D	BnaC06g11680D
BnaA03g28370D	BnaC01g08460D		BnaA03g48550D	BnaC09g48690D
BnaA04g25160D	BnaC03g13570D		BnaA05g13860D	BnaA01g20460D
BnaA05g15530D	BnaC04g33290D		BnaA05g14180D	BnaA03g34650D
BnaA05g17090D	BnaA05g00390D		BnaA07g28180D	BnaA06g15970D
BnaA06g20500D	BnaA09g13620D		BnaA07g35810D	BnaA10g14450D
BnaA07g25870D	BnaA10g05670D		BnaC01g05130D	BnaC05g21930D
BnaA07g35870D	BnaA10g06870D		BnaC01g10150D	BnaC05g38860D
BnaA08g21410D	BnaC05g08510D		BnaC01g20160D	BnaC07g40360D
BnaA09g26650D	BnaC06g18880D		BnaC03g15010D	BnaC09g31840D
BnaA09g46300D	BnaC09g03930D		BnaC03g50650D	BnaC09g40960D
BnaA10g09000D	BnaC09g18630D		BnaC04g29410D	BnaA03g11500D
BnaA10g14160D	BnaA05g11570D		BnaC04g36170D	BnaA04g18340D
BnaA10g15520D	BnaA07g06330D		BnaC05g00180D	BnaA05g25320D
BnaC01g21830D	BnaA08g12940D		BnaC05g21980D	BnaA07g09780D
BnaC03g24420D	BnaC01g18300D		BnaC06g29000D	BnaA09g13790D
BnaC03g29920D	BnaC02g14050D		BnaA01g29950D	BnaC01g03130D
BnaC03g41240D	BnaC04g21240D		BnaA03g08940D	BnaC03g09220D
BnaC03g68230D	BnaC04g31380D		BnaA03g31070D	BnaC04g11630D
BnaC03g69410D	BnaC04g38920D		BnaA04g09750D	BnaC05g06500D
BnaC05g24810D	BnaC08g36710D		BnaA04g14500D	BnaC05g08430D
BnaC06g02750D	BnaC08g40140D		BnaA04g25250D	BnaC05g34670D
BnaC06g09380D	BnaC09g36340D		BnaA06g21910D	BnaC07g25920D
BnaC06g36010D	BnaA02g20460D		BnaA06g34040D	BnaC09g30270D
BnaC07g23220D	BnaA05g06640D		BnaA07g04570D	BnaA02g10090D
BnaC07g42680D	BnaA08g00250D		BnaA09g37660D	BnaA04g06630D
BnaC08g14100D	BnaC02g31090D		BnaA10g01480D	BnaA06g12340D
BnaC08g15500D	BnaC04g30280D		BnaC01g04550D	BnaA08g23080D
BnaC08g22900D	BnaA02g26270D		BnaC01g17110D	BnaC01g11980D
BnaC08g33220D	BnaA03g13500D		BnaC02g24050D	BnaC01g35670D
BnaC09g38910D	BnaA06g30200D		BnaC03g28680D	BnaC06g05360D
BnaC09g47460D	BnaA07g09920D		BnaC04g09870D	BnaC06g26700D
BnaA01g01740D	BnaA08g25300D		BnaC05g45940D	BnaC07g13630D
BnaA03g18350D	BnaA09g01000D		BnaC08g02820D	BnaA05g30670D
BnaA03g35640D	BnaA09g01550D		BnaC08g36950D	BnaA06g02060D
BnaA04g26500D	BnaC03g03710D		BnaA01g06730D	BnaA06g12930D
BnaA05g18360D	BnaC04g01400D		BnaA01g06770D	BnaA06g14080D
BnaA09g27670D	BnaC06g31720D		BnaA04g21290D	BnaA07g12260D
BnaA09g39800D	BnaA02g27690D		BnaA08g08300D	BnaA07g22240D
BnaC02g02780D	BnaA03g12220D		BnaA08g27110D	BnaA07g30940D
BnaC03g03630D	BnaA06g03640D		BnaA09g08070D	BnaA09g31930D
BnaC03g17660D	BnaA07g18830D		BnaA09g14260D	BnaA09g35480D
BnaC03g30280D	BnaA10g01740D		BnaA09g15760D	BnaC02g27390D
BnaC03g54730D	BnaC04g23020D		BnaA10g09790D	BnaC03g65510D
BnaC03g57260D	BnaC05g19690D		BnaC02g13080D	BnaC04g51690D
BnaC06g03830D	BnaC07g21370D		BnaC04g14400D	BnaC05g05140D
BnaC07g26060D	BnaA01g10620D		BnaC05g47310D	BnaC05g07760D
BnaC07g41740D	BnaA01g19450D		BnaC06g24170D	BnaC05g42610D
BnaC08g27120D	BnaA03g15100D		BnaC06g35230D	BnaC08g29450D
BnaC08g35630D	BnaC03g18090D		BnaC07g47600D	BnaA02g27420D
BnaC08g40410D	BnaC03g61350D		BnaC08g34400D	BnaA03g03150D
BnaC08g45420D	BnaC04g41350D		BnaC08g37170D	BnaA03g15020D
BnaC09g12000D	BnaC05g29950D		BnaC09g03450D	BnaA04g08230D
BnaA01g14910D	BnaC07g28990D		BnaA03g10310D	BnaA05g10540D
BnaA01g17670D	BnaA01g33420D		BnaA03g25200D	BnaA05g23360D
BnaA03g29860D	BnaA03g33300D		BnaA05g12920D	BnaA06g00170D
BnaA03g43810D	BnaA04g24360D		BnaA05g33840D	BnaA06g26500D
BnaA04g00260D	BnaA05g05000D		BnaA06g34170D	BnaA06g36820D
BnaA04g18540D	BnaA05g09840D		BnaA09g19890D	BnaA07g00760D
BnaA05g07370D	BnaA09g05910D		BnaC03g41470D	BnaA09g02480D
BnaA05g22350D	BnaC01g17700D		BnaC04g37540D	BnaA10g08220D
BnaA09g27610D	BnaC04g15350D		BnaC06g21340D	BnaC02g30770D
BnaA09g37020D	BnaC04g19370D		BnaC06g29730D	BnaC02g31470D
BnaA10g07920D	BnaC08g31990D		BnaC07g14030D	BnaC03g33620D
BnaC03g47220D	BnaA02g18240D		BnaC07g15040D	BnaC04g45750D
BnaC04g38160D	BnaA04g19410D		BnaA01g26530D	BnaC07g11440D
BnaC05g15870D	BnaA07g04040D		BnaA02g15070D	BnaA01g15050D
BnaC05g15920D	BnaC01g38610D		BnaA03g01210D	BnaA03g18060D
BnaC05g18530D	BnaC06g04810D		BnaA03g36060D	BnaA03g52060D
BnaC05g38260D	BnaC06g34860D		BnaA03g48100D	BnaA05g26730D
BnaC05g48760D	BnaC07g25820D		BnaA05g19360D	BnaA05g29660D
BnaC06g00260D	BnaA07g01610D		BnaA05g25940D	BnaA05g31770D
BnaC06g15530D	BnaA09g50200D		BnaA09g34090D	BnaA06g03960D
BnaC06g25970D	BnaC01g09850D		BnaA09g49440D	BnaA06g04070D
BnaC06g32480D	BnaC03g18110D		BnaC01g04800D	BnaA07g01600D
BnaC07g09080D	BnaA02g10860D		BnaC02g19160D	BnaA09g37430D
BnaC07g23400D	BnaA05g20570D		BnaC03g07330D	BnaA10g19860D
BnaC08g26250D	BnaA05g23520D		BnaC03g28500D	BnaC01g11690D
BnaA01g20450D	BnaA06g04370D		BnaC05g31550D	BnaC02g15820D
BnaA03g11440D	BnaA06g15870D		BnaC07g31870D	BnaC02g33260D
BnaA03g42130D	BnaA09g33470D		BnaC08g02620D	BnaC04g50760D
BnaA05g21200D	BnaC01g08510D		BnaA01g13390D	BnaC06g31890D
BnaA05g30880D	BnaC01g09870D		BnaA06g07670D	BnaC07g24720D
BnaA07g07780D	BnaC01g13160D		BnaA06g27960D	BnaC08g16340D
BnaA08g13820D	BnaC02g35560D		BnaA07g33600D	BnaC09g20430D
BnaA09g16890D	BnaA06g04070D		BnaA09g07330D	BnaC09g36570D
BnaA09g17460D	BnaA06g16060D		BnaA09g14230D	BnaA01g22700D
BnaA09g41150D	BnaA06g22700D		BnaC01g32250D	BnaA02g00110D
BnaA10g23450D	BnaA06g27360D		BnaC02g24690D	BnaA03g12940D
BnaC02g21980D	BnaA09g05410D		BnaC02g37810D	BnaA06g00700D
BnaC02g24110D	BnaC02g05590D		BnaC03g39650D	BnaA06g13300D
BnaC03g31730D	BnaC04g48020D		BnaC03g40580D	BnaA07g20080D
BnaC04g29090D	BnaC05g36940D		BnaC05g01900D	BnaA08g09900D
BnaC04g36000D	BnaC08g09940D		BnaC05g12320D	BnaC01g29610D
BnaC04g50880D	BnaC08g16210D		BnaC08g21180D	BnaC02g21820D
BnaC05g30670D	BnaA05g05750D		BnaC08g32490D	BnaC07g47430D
BnaC07g08590D	BnaA09g42630D		BnaC09g38090D	BnaC08g31410D
BnaC07g35550D	BnaC03g21770D		BnaA01g16670D	BnaC09g46960D
BnaC07g42330D	BnaC03g61150D		BnaA01g17010D	BnaC09g48100D
BnaA02g01480D	BnaC04g16630D		BnaA02g15200D	BnaA01g03750D
BnaA04g10770D	BnaC05g01780D		BnaA05g25650D	BnaA01g25930D
BnaA04g16960D	BnaC06g34850D		BnaA06g23040D	BnaA06g05490D
BnaA06g04010D	BnaA02g18450D		BnaA07g00960D	BnaA06g09160D
BnaA08g18920D	BnaA07g17260D		BnaA07g22110D	BnaA09g36820D
BnaA09g37000D	BnaA09g05370D		BnaA09g29240D	BnaA10g21920D
BnaA10g02800D	BnaC01g39680D		BnaA10g09580D	BnaC04g10650D
BnaA10g04310D	BnaC06g05350D		BnaC01g03640D	BnaC07g33490D
BnaA10g05890D	BnaC07g30700D		BnaC01g37840D	BnaC08g35830D
BnaC01g21570D	BnaA04g00530D		BnaC02g10550D	BnaA05g18980D
BnaC03g00220D	BnaA04g18340D		BnaC03g24320D	BnaA06g22640D
BnaC03g16000D	BnaA05g08710D		BnaC04g35430D	BnaA07g17020D
BnaC03g25350D	BnaA09g49840D		BnaC05g21510D	BnaA09g29710D
BnaC03g27280D	BnaA10g02590D		BnaC05g32860D	BnaC01g29060D
BnaC03g28990D	BnaA10g24450D		BnaC06g12210D	BnaC03g05540D
BnaC03g49500D	BnaC04g05830D		BnaC06g33810D	BnaC03g38220D
BnaC04g41130D	BnaC05g32490D		BnaC07g03830D	BnaC03g46010D
BnaC05g25930D	BnaC08g04860D		BnaC07g09950D	BnaC06g39330D
BnaC05g48670D	BnaC08g32730D		BnaC07g43110D	BnaC07g37260D
BnaC06g07880D	BnaA06g06170D		BnaC08g25840D	BnaC07g38540D
BnaC06g27950D	BnaC01g12750D		BnaC08g42550D	BnaC08g26000D
BnaC07g02940D	BnaC01g26420D		BnaC09g45830D	BnaA01g19700D
BnaC07g35820D	BnaC07g19750D		BnaA01g22270D	BnaA03g17110D
BnaC07g43070D	BnaC09g05100D		BnaA02g00060D	BnaA03g38990D
BnaA02g27730D	BnaC09g18680D		BnaA03g02490D	BnaA04g10060D
BnaA06g16790D	BnaA01g31730D		BnaA04g27030D	BnaA06g22980D
BnaA07g13260D	BnaA02g24050D		BnaA05g19070D	BnaA07g25790D
BnaA09g02920D	BnaA04g13370D		BnaA07g05650D	BnaA08g28320D
BnaA09g15720D	BnaC01g18330D		BnaA07g17490D	BnaA09g29040D
BnaA09g47190D	BnaC06g15320D		BnaA09g29540D	BnaC02g42350D
BnaA10g01950D	BnaA10g14480D		BnaC01g23500D	BnaC05g02420D
BnaA10g23550D	BnaC03g38300D		BnaC02g09270D	BnaC06g15000D
BnaC01g03300D	BnaC05g08050D		BnaC02g16490D	BnaC06g18230D
BnaC02g35980D	BnaC06g30920D		BnaC02g37900D	BnaC06g27230D
BnaC03g29410D	BnaC08g12650D		BnaC03g33280D	BnaC08g11670D
BnaC03g44160D	BnaC08g38540D		BnaC04g08340D	BnaC08g22430D
BnaC05g04860D	BnaA03g35790D		BnaC04g20870D	BnaC09g38370D
BnaC05g48660D	BnaA06g31210D		BnaC05g18100D	BnaA01g12130D
BnaC06g24750D	BnaC01g22480D		BnaC05g41940D	BnaA02g14350D
BnaC06g28360D	BnaC04g44230D		BnaC06g33250D	BnaA03g27190D
BnaC08g03290D	BnaC05g00110D		BnaC06g37010D	BnaA03g43960D
BnaC08g44610D	BnaC08g23310D		BnaC09g35680D	BnaA06g03460D
BnaA01g27890D	BnaC01g04390D		BnaC09g49270D	BnaA09g33040D
BnaA02g18820D	BnaC01g07390D		BnaA01g10060D	BnaC03g34350D
BnaA03g04310D	BnaC04g04770D		BnaA01g26290D	BnaC04g36140D
BnaA03g21870D	BnaA03g21550D		BnaA02g04260D	BnaC05g33310D
BnaA03g34190D	BnaA09g39640D		BnaA02g24030D	BnaC06g02880D
BnaA05g10890D	BnaC01g28660D		BnaA03g10680D	BnaC08g06490D
BnaA07g33900D	BnaC08g19150D		BnaA04g24730D	BnaC08g37780D
BnaA08g00370D	BnaA01g24510D		BnaA05g12790D	BnaC09g04250D
BnaA08g00910D	BnaA02g20820D		BnaA06g04450D	BnaA01g11900D
BnaA08g01230D	BnaA03g51620D		BnaA07g32050D	BnaA01g19110D
BnaA10g21300D	BnaA06g30980D		BnaA08g12350D	BnaA02g07410D
BnaC02g26840D	BnaA06g36180D		BnaA09g36740D	BnaA02g10080D
BnaC02g42320D	BnaC03g44510D		BnaC01g04580D	BnaA05g29670D
BnaC03g57880D	BnaC07g09520D		BnaC01g18930D	BnaA09g15250D
BnaC03g57890D	BnaA02g05050D		BnaC01g19120D	BnaA09g18110D
BnaC04g08450D	BnaA09g06200D		BnaC03g06690D	BnaC03g16610D
BnaC06g27040D	BnaA09g39240D		BnaC03g13910D	BnaC03g16660D
BnaC08g24890D	BnaA07g06230D		BnaC03g26010D	BnaC03g67820D
BnaC08g30060D	BnaC01g37010D		BnaC03g43300D	BnaC04g31270D
BnaC09g46030D	BnaA02g09600D		BnaC04g33750D	BnaC07g41490D
BnaA01g20430D	BnaA05g33830D		BnaC05g23480D	BnaC09g10330D
BnaA01g21350D	BnaC01g13790D		BnaC05g32080D	BnaA01g21450D
BnaA01g32400D	BnaC03g15410D		BnaC06g04930D	BnaA07g20340D
BnaA02g21130D	BnaC03g28370D		BnaC08g00900D	BnaA07g24190D
BnaA07g21410D	BnaA10g25900D		BnaC08g09400D	BnaA10g06250D
BnaA08g07410D	BnaC02g20480D		BnaC08g41310D	BnaC01g37420D
BnaA08g19370D	BnaC08g31540D		BnaA01g13820D	BnaC06g31460D
BnaC01g07750D	BnaC09g43120D		BnaA01g22520D	BnaC06g39220D
BnaC01g11420D	BnaA01g09740D		BnaA02g04860D	BnaC07g31640D
BnaC01g14590D	BnaA03g04090D		BnaA02g12340D	BnaA01g12310D
BnaC03g53770D	BnaC05g07760D		BnaA03g08460D	BnaA01g33020D
BnaC04g19410D	BnaC06g09680D		BnaA05g05340D	BnaA03g21520D
BnaC04g34170D	BnaA05g20600D		BnaA07g15440D	BnaA04g01240D
BnaC05g27590D	BnaC06g23040D		BnaA07g30270D	BnaA07g15200D
BnaC06g08010D	BnaC09g10170D		BnaC02g00770D	BnaA08g28230D
BnaC06g14930D	BnaA03g48610D		BnaC04g10630D	BnaC01g17320D
BnaC07g15780D	BnaA09g49480D		BnaC04g49110D	BnaC02g09630D
BnaC08g03140D	BnaC02g41610D		BnaC05g30760D	BnaC02g33030D
BnaC09g06980D	BnaC04g47580D		BnaC05g40320D	BnaC04g24790D
BnaA03g53060D	BnaC06g08890D		BnaC06g36120D	BnaC06g23400D
BnaA05g03490D	BnaA03g50370D		BnaC07g04000D	BnaA01g24660D
BnaA05g29000D	BnaA05g14820D		BnaC07g32660D	BnaA02g04750D
BnaA07g10980D	BnaA06g27560D		BnaA01g15080D	BnaA03g05400D
BnaA07g19810D	BnaC01g11590D		BnaA01g15940D	BnaA04g26430D
BnaA07g29990D	BnaC03g02390D		BnaA03g05630D	BnaA07g09080D
BnaA08g11510D	BnaC03g60020D		BnaA03g48460D	BnaA08g02240D
BnaA09g11420D	BnaC05g15520D		BnaA03g54270D	BnaA09g38570D
BnaA09g30020D	BnaA01g13280D		BnaA04g25160D	BnaA09g42060D
BnaC01g04190D	BnaA02g09810D		BnaA05g13330D	BnaC03g55330D
BnaC02g23440D	BnaA07g32980D		BnaA06g17400D	BnaC04g08790D
BnaC03g10830D	BnaA09g04510D		BnaA06g34490D	BnaC05g05960D
BnaC03g71030D	BnaA09g14240D		BnaA07g11460D	BnaA01g33990D
BnaC04g28450D	BnaC03g23610D		BnaA08g08580D	BnaA02g02280D
BnaC04g37950D	BnaC03g32360D		BnaC01g11930D	BnaA02g16740D
BnaC05g18370D	BnaC01g11900D		BnaC02g12900D	BnaA05g09870D
BnaC08g38260D	BnaC03g70960D		BnaC02g19380D	BnaA06g24560D
BnaA02g27570D	BnaC06g17000D		BnaC02g34790D	BnaA10g06720D
BnaA02g28280D	BnaC08g27790D		BnaC02g41670D	BnaA10g17640D
BnaA05g08700D	BnaA09g04740D		BnaC03g52680D	BnaC02g41520D
BnaA06g29800D	BnaA10g25060D		BnaC07g03990D	BnaC03g38950D
BnaA08g25410D	BnaA01g06680D		BnaC07g16570D	BnaC06g01790D
BnaA09g00840D	BnaA01g22400D		BnaC07g34450D	BnaC07g30430D
BnaA09g01490D	BnaA06g10580D		BnaC08g41890D	BnaA01g01070D
BnaA09g27040D	BnaA09g05670D		BnaC09g22550D	BnaA01g18410D
BnaC01g04650D	BnaA09g08230D		BnaA01g27280D	BnaA02g12170D
BnaC02g24390D	BnaA10g10600D		BnaA06g24090D	BnaA02g13610D
BnaC03g42420D	BnaC03g28340D		BnaA07g09180D	BnaA03g38560D
BnaC05g42930D	BnaC04g07830D		BnaA07g27170D	BnaA03g42600D
BnaC06g19390D	BnaC05g16670D		BnaA09g20820D	BnaA07g22120D
BnaC07g00670D	BnaC07g46660D		BnaA09g40600D	BnaA09g24080D
BnaC07g00830D	BnaA01g06150D		BnaC01g40120D	BnaA10g00420D
BnaC07g07260D	BnaA03g29740D		BnaC02g23950D	BnaC01g06950D
BnaC07g27950D	BnaA09g24720D		BnaC03g05320D	BnaC01g30990D
BnaC07g29700D	BnaC02g43200D		BnaC03g09980D	BnaC02g03510D
BnaC08g30960D	BnaC03g01150D		BnaC03g21750D	BnaC02g18980D
BnaA03g28050D	BnaC09g32320D		BnaC03g27570D	BnaC03g24870D
BnaA03g53360D	BnaA02g26670D		BnaC04g27680D	BnaC03g58740D
BnaA05g17080D	BnaA03g11230D		BnaC05g12080D	BnaC04g17360D
BnaA09g20230D	BnaA07g21460D		BnaC05g40810D	BnaC04g45070D
BnaA09g47000D	BnaC02g24770D		BnaC06g02930D	BnaC06g23040D
BnaC01g01540D	BnaC09g14570D		BnaC06g24270D	BnaC07g19020D
BnaC01g20850D	BnaA09g35290D		BnaC09g33960D	BnaC08g09840D
BnaC02g15070D	BnaC02g22320D		BnaC09g42870D	BnaA01g32830D
BnaC05g13010D	BnaC07g07110D		BnaA01g26090D	BnaA03g15680D
BnaC06g21890D	BnaA05g33250D		BnaA02g32760D	BnaA03g29230D
BnaC06g38810D	BnaC05g46690D		BnaA03g10020D	BnaA05g16360D
BnaC08g34220D	BnaC09g14770D		BnaA03g25240D	BnaA06g07880D
BnaC08g45150D	BnaA02g11690D		BnaA03g49390D	BnaA10g12910D
BnaA01g25520D	BnaA08g15520D		BnaA03g51370D	BnaA10g15410D
BnaA02g09290D	BnaC03g15540D		BnaA05g08730D	BnaC03g20090D
BnaA05g00490D	BnaC05g45840D		BnaA08g13490D	BnaC03g29560D
BnaA08g03930D	BnaC05g48870D		BnaA08g19180D	BnaC06g04070D
BnaA10g09960D	BnaC08g36500D		BnaA08g28170D	BnaC07g01520D
BnaC01g36550D	BnaA03g13050D		BnaA09g09050D	BnaA02g20420D
BnaC02g22460D	BnaA03g16830D		BnaA10g10170D	BnaA03g02850D
BnaC03g25620D	BnaA07g11050D		BnaA10g12560D	BnaA05g01380D
BnaC03g57470D	BnaC02g05300D		BnaC02g01730D	BnaA05g20540D
BnaC04g50140D	BnaA07g06260D		BnaC02g12000D	BnaC01g00120D
BnaC05g25550D	BnaC03g04930D		BnaC03g13430D	BnaC01g17420D
BnaC06g12700D	BnaA01g04880D		BnaC04g12530D	BnaC01g24150D
BnaC06g35990D	BnaA03g40260D		BnaC04g46510D	BnaC05g20270D
BnaC07g40540D	BnaA09g40540D		BnaC06g06870D	BnaC08g34930D
BnaC07g46250D	BnaA09g48440D		BnaC06g25540D	BnaC09g20480D
BnaC08g34350D	BnaC02g12870D		BnaC07g33430D	BnaC09g34450D
BnaA01g16460D	BnaC06g30890D		BnaC08g12320D	BnaC09g43090D
BnaA04g15210D	BnaC07g15250D		BnaC08g13470D	BnaA02g25600D
BnaA05g03740D	BnaC09g24870D		BnaC08g33360D	BnaA03g01960D
BnaC01g20290D	BnaA05g08390D		BnaA01g03530D	BnaA05g04140D
BnaC03g15100D	BnaC08g01840D		BnaA03g27660D	BnaA05g09230D
BnaC03g19660D	BnaA05g05380D		BnaA04g01230D	BnaA07g12390D
BnaC03g68810D	BnaA06g31910D		BnaA08g04960D	BnaA07g18720D
BnaC04g00410D	BnaC02g36890D		BnaA08g07880D	BnaA07g29700D
BnaC04g24890D	BnaC02g37630D		BnaA08g20170D	BnaA08g25470D
BnaC04g45600D	BnaC06g09740D		BnaA08g24020D	BnaC01g00470D
BnaC07g35240D	BnaC08g27410D		BnaA09g27130D	BnaC01g03930D
BnaC08g22130D	BnaA03g39500D		BnaA09g28180D	BnaC01g34080D
BnaA01g18990D	BnaA04g17580D		BnaA09g38290D	BnaC02g17290D
BnaA02g34250D	BnaC02g21680D		BnaA09g40760D	BnaC02g41870D
BnaA03g13940D	BnaA09g46610D		BnaA10g17870D	BnaC06g36140D
BnaA03g46060D	BnaC04g13850D		BnaC01g13840D	BnaC08g29310D
BnaA04g14290D	BnaC05g24100D		BnaC01g22020D	BnaA01g15700D
BnaA05g16380D	BnaA02g28180D		BnaC01g31940D	BnaA01g15770D
BnaA07g20440D	BnaA06g08000D		BnaC03g57260D	BnaA05g01150D
BnaA08g28540D	BnaA06g12830D		BnaC04g13020D	BnaA05g32060D
BnaA09g10560D	BnaA07g12390D		BnaC04g47360D	BnaA06g32940D
BnaA10g09790D	BnaA09g36980D		BnaC05g00880D	BnaA09g05900D
BnaC03g10620D	BnaC04g48480D		BnaC05g01080D	BnaA09g19550D
BnaC03g30080D	BnaA01g14380D		BnaC06g30100D	BnaA09g49670D
BnaC04g39960D	BnaA07g01550D		BnaC06g30710D	BnaC01g33490D
BnaC08g21250D	BnaA07g06500D		BnaC07g00280D	BnaC01g35080D
BnaA03g02730D	BnaC03g63790D		BnaC07g05580D	BnaC02g28120D
BnaA03g40820D	BnaC04g31460D		BnaC07g16390D	BnaC02g35560D
BnaA04g20090D	BnaA03g16950D		BnaC07g45680D	BnaC07g23260D
BnaA05g00900D	BnaA04g04140D		BnaC08g19630D	BnaA02g21280D
BnaA09g38120D	BnaA04g14220D		BnaC08g21600D	BnaA03g06530D
BnaA10g13920D	BnaC01g04130D		BnaC08g39380D	BnaA03g17630D
BnaC03g28300D	BnaA01g25930D		BnaC08g41570D	BnaA04g19010D
BnaC04g28570D	BnaA05g03320D		BnaC09g02020D	BnaA07g05950D
BnaC04g50300D	BnaC09g06400D		BnaC09g02850D	BnaA07g24860D
BnaC08g44370D	BnaA08g17350D		BnaC09g34310D	BnaA08g22360D
BnaC09g23830D	BnaA10g21100D		BnaA01g09020D	BnaA08g25580D
BnaC09g45530D	BnaC01g13710D		BnaA01g28660D	BnaC01g08860D
BnaA01g27020D	BnaA01g13130D		BnaA02g00560D	BnaC04g03740D
BnaA03g07140D	BnaA04g00110D		BnaA02g02000D	BnaC04g18260D
BnaA03g36720D	BnaC08g35000D		BnaA02g03970D	BnaC05g28450D
BnaA04g04310D	BnaC08g45850D		BnaA02g19200D	BnaC05g36950D
BnaA05g31720D	BnaC09g50140D		BnaA02g23800D	BnaC09g15650D
BnaA06g22230D	BnaA01g23070D		BnaA03g09390D	BnaA02g29860D
BnaA09g29550D	BnaA07g06160D		BnaA06g05540D	BnaA05g29210D
BnaA09g30490D	BnaC07g32980D		BnaA06g24400D	BnaA05g30280D
BnaC01g35020D	BnaA02g24920D		BnaA06g32110D	BnaA07g28510D
BnaC03g28870D	BnaA04g04350D		BnaA06g34070D	BnaA09g41710D
BnaC04g03030D	BnaA05g26870D		BnaA07g14760D	BnaA09g43610D
BnaC04g24200D	BnaA06g30720D		BnaA07g29640D	BnaC01g11700D
BnaC07g36310D	BnaA07g02270D		BnaA08g12820D	BnaC02g13880D
BnaC08g42610D	BnaA04g14310D		BnaA08g19540D	BnaC02g41550D
BnaC08g45710D	BnaA10g22560D		BnaA09g27220D	BnaC03g03360D
BnaA01g31440D	BnaC02g34420D		BnaA10g05910D	BnaC03g26660D
BnaA02g01740D	BnaA03g10470D		BnaA10g17650D	BnaC03g60810D
BnaA02g30670D	BnaA05g30960D		BnaA10g26890D	BnaC05g48590D
BnaA03g29930D	BnaC02g42340D		BnaC02g22850D	BnaC06g02180D
BnaA03g35750D	BnaC09g49280D		BnaC03g19680D	BnaC07g25690D
BnaA04g11080D	BnaA04g08410D		BnaC03g20930D	BnaC08g13600D
BnaA07g12520D	BnaA06g09770D		BnaC03g22340D	BnaC09g42200D
BnaC02g31500D	BnaA08g20220D		BnaC03g59220D	BnaA03g13710D
BnaC04g16140D	BnaC02g07910D		BnaC05g12210D	BnaA07g34140D
BnaC05g28480D	BnaC04g32990D		BnaC05g28490D	BnaA07g34490D
BnaC05g32790D	BnaC05g15260D		BnaC05g41290D	BnaA08g01890D
BnaC05g38530D	BnaA03g19740D		BnaC06g29270D	BnaA08g02570D
BnaC05g43400D	BnaA05g01200D		BnaC07g18790D	BnaA09g18400D
BnaC06g02600D	BnaA05g18820D		BnaC07g39080D	BnaA09g43730D
BnaC06g31430D	BnaA06g32690D		BnaC08g01180D	BnaA09g49990D
BnaC06g40530D	BnaA07g01170D		BnaC08g34580D	BnaC04g07990D
BnaA01g18120D	BnaA07g05800D		BnaC08g39720D	BnaC04g16900D
BnaA03g24010D	BnaA09g45870D		BnaA03g02810D	BnaC04g26740D
BnaA05g17130D	BnaC01g09280D		BnaA03g21870D	BnaC04g40860D
BnaA06g03330D	BnaC01g12880D		BnaA07g15340D	BnaC04g50700D
BnaA06g25810D	BnaC02g11560D		BnaA07g27890D	BnaC07g22440D
BnaA08g01170D	BnaC03g59260D		BnaA07g35610D	BnaC08g27550D
BnaA10g22130D	BnaC04g36110D		BnaA08g21240D	BnaC09g04660D
BnaC03g41900D	BnaC05g20560D		BnaA08g23810D	BnaA02g26600D
BnaC03g62030D	BnaC07g46770D		BnaA09g08000D	BnaA03g49310D
BnaC04g14410D	BnaC08g00670D		BnaA09g21270D	BnaA06g03760D
BnaC06g13190D	BnaC09g28680D		BnaA10g16700D	BnaA08g07580D
BnaC07g24250D	BnaA01g04850D		BnaA10g27570D	BnaA08g15460D
BnaA01g07140D	BnaA02g08330D		BnaC01g16080D	BnaA10g11940D
BnaA01g10680D	BnaA05g23490D		BnaC01g19320D	BnaA10g26700D
BnaA02g09670D	BnaA05g23780D		BnaC01g29960D	BnaC02g10850D
BnaA05g22000D	BnaA05g25160D		BnaC02g01670D	BnaC03g66770D
BnaA08g02810D	BnaA05g33210D		BnaC02g04260D	BnaC04g20090D
BnaA09g03450D	BnaA09g24610D		BnaC02g13700D	BnaC05g13850D
BnaA09g22520D	BnaA09g47830D		BnaC02g22420D	BnaC05g37150D
BnaA09g24830D	BnaA10g02180D		BnaC03g29470D	BnaC07g39160D
BnaA09g27660D	BnaA10g06770D		BnaC03g34080D	BnaC08g23450D
BnaA10g05390D	BnaC03g12900D		BnaC03g46030D	BnaC08g39880D
BnaC01g02060D	BnaC04g50510D		BnaC04g28510D	BnaC09g21510D
BnaC02g21910D	BnaA03g53770D		BnaC08g03990D	BnaA01g09990D
BnaC03g06080D	BnaA05g08430D		BnaC08g34420D	BnaA02g33040D
BnaC04g35970D	BnaC02g37710D		BnaC08g42950D	BnaA04g16120D
BnaC08g15310D	BnaC05g02100D		BnaC09g16470D	BnaA09g19170D
BnaC08g39180D	BnaC08g38550D		BnaC09g20810D	BnaC01g08420D
BnaA01g12780D	BnaA03g17050D		BnaA01g33600D	BnaC01g35930D
BnaA02g08860D	BnaA05g23460D		BnaA03g33730D	BnaC04g32810D
BnaA02g16570D	BnaA05g27970D		BnaA03g41150D	BnaA03g20440D
BnaA09g20360D	BnaA07g00170D		BnaA03g48490D	BnaA03g40280D
BnaA09g47610D	BnaA07g28150D		BnaA04g13010D	BnaA03g54750D
BnaC03g69640D	BnaA09g40060D		BnaA04g22900D	BnaA06g13390D
BnaC05g23250D	BnaC01g04460D		BnaA04g26220D	BnaA07g05110D
BnaC05g30250D	BnaC03g57230D		BnaA05g23900D	BnaA07g13160D
BnaC07g11320D	BnaC05g01450D		BnaA06g10900D	BnaA09g00630D
BnaC09g42240D	BnaC05g25190D		BnaA06g11180D	BnaA09g18380D
BnaA02g13130D	BnaA03g08320D		BnaA06g18940D	BnaC01g38660D
BnaA03g45230D	BnaA03g28510D		BnaA06g31680D	BnaC02g07190D
BnaA03g47200D	BnaA06g18500D		BnaA08g05140D	BnaC02g41610D
BnaA04g10390D	BnaA07g32220D		BnaC01g05670D	BnaC06g02270D
BnaA07g08370D	BnaA09g02190D		BnaC01g26210D	BnaA03g02390D
BnaC01g00470D	BnaA09g49470D		BnaC01g37900D	BnaA03g11590D
BnaC01g05680D	BnaC03g22450D		BnaC02g01060D	BnaA03g34800D
BnaC06g29270D	BnaC04g17860D		BnaC03g45120D	BnaA06g23490D
BnaC07g21690D	BnaA02g08030D		BnaC05g04960D	BnaA07g23430D
BnaC07g44140D	BnaC03g61270D		BnaC07g10800D	BnaA09g35220D
BnaC08g17590D	BnaC05g42350D		BnaC07g26430D	BnaA10g18360D
BnaC08g26150D	BnaC08g18910D		BnaC08g00590D	BnaC05g08250D
BnaA03g02660D	BnaA03g11590D		BnaC08g11150D	BnaC06g31880D
BnaA03g32960D	BnaA06g01650D		BnaC08g42500D	BnaC08g12100D
BnaA09g01970D	BnaA09g11620D		BnaC09g24780D	BnaA01g20800D
BnaA09g14970D	BnaA09g47450D		BnaC09g45140D	BnaA02g24940D
BnaA09g18520D	BnaC04g18540D		BnaC09g46010D	BnaA04g22080D
BnaC02g06030D	BnaC04g45730D		BnaA01g05000D	BnaA05g19470D
BnaC02g13080D	BnaC06g37810D		BnaA01g10510D	BnaA06g16090D
BnaC02g29590D	BnaC07g29760D		BnaA02g23650D	BnaA06g26120D
BnaC03g33450D	BnaC08g11400D		BnaA02g27300D	BnaA07g06500D
BnaC04g35550D	BnaA01g19460D		BnaA02g31950D	BnaA09g14940D
BnaC05g04490D	BnaA03g34980D		BnaA03g16240D	BnaA10g24480D
BnaC06g03450D	BnaA04g23070D		BnaA03g40110D	BnaC04g45460D
BnaC06g32240D	BnaA05g04100D		BnaA05g03040D	BnaC05g11700D
BnaC09g35570D	BnaA05g06610D		BnaA07g09600D	BnaC06g36630D
BnaC09g38740D	BnaA06g13070D		BnaA07g12510D	BnaC08g01640D
BnaA01g20050D	BnaA07g02640D		BnaA07g23360D	BnaC09g44890D
BnaA02g24210D	BnaC01g02350D		BnaA09g36620D	BnaA03g27440D
BnaA02g27410D	BnaC02g21230D		BnaA09g44290D	BnaA04g19090D
BnaA05g01590D	BnaC06g26450D		BnaA10g09720D	BnaA04g21780D
BnaA05g18290D	BnaC06g30370D		BnaC01g06420D	BnaA05g05880D
BnaA07g02880D	BnaC06g30580D		BnaC03g45840D	BnaA07g04220D
BnaA08g19210D	BnaC08g06530D		BnaC03g58430D	BnaA08g01880D
BnaA09g23550D	BnaA02g19740D		BnaC04g24030D	BnaC01g07400D
BnaA09g29880D	BnaA03g16160D		BnaC04g28300D	BnaC03g51830D
BnaA09g45690D	BnaA07g31010D		BnaC04g33760D	BnaC04g33430D
BnaA10g07650D	BnaA08g02000D		BnaC05g23060D	BnaC06g36700D
BnaA10g08050D	BnaA09g43000D		BnaC08g06990D	BnaC07g00580D
BnaC01g06650D	BnaA10g00220D		BnaC08g16360D	BnaA02g19040D
BnaC01g26970D	BnaC03g03720D		BnaC08g27040D	BnaA03g46230D
BnaC03g69330D	BnaC05g24230D		BnaC08g30970D	BnaA07g21530D
BnaC04g38790D	BnaC06g10110D		BnaC09g00530D	BnaC01g33150D
BnaC04g45960D	BnaC08g27590D		BnaC09g45520D	BnaC02g09450D
BnaC04g47170D	BnaC08g31520D		BnaA01g14350D	BnaC07g33650D
BnaC05g01160D	BnaC08g42920D		BnaA02g22960D	BnaC08g17750D
BnaC05g10720D	BnaA01g11600D		BnaA03g14810D	BnaA01g28250D
BnaC05g32080D	BnaA04g01250D		BnaA05g08870D	BnaA02g06210D
BnaC06g07090D	BnaA06g11740D		BnaA05g24500D	BnaA03g48130D
BnaC07g43360D	BnaA09g02160D		BnaA05g24510D	BnaA06g08950D
BnaC08g36840D	BnaA09g35700D		BnaA06g00490D	BnaA10g14440D
BnaA01g00600D	BnaA10g04030D		BnaA06g00730D	BnaC04g08770D
BnaA02g28310D	BnaC01g09930D		BnaA06g15770D	BnaA01g28200D
BnaA03g29980D	BnaC01g11520D		BnaA06g19390D	BnaA03g35020D
BnaA09g29560D	BnaC01g17020D		BnaA06g22270D	BnaA04g08990D
BnaC02g36350D	BnaC03g09690D		BnaA07g20850D	BnaA05g00930D
BnaC03g13280D	BnaC03g20730D		BnaC02g00740D	BnaA07g16890D
BnaC06g04570D	BnaC04g08930D		BnaC02g15040D	BnaA08g21320D
BnaC06g32060D	BnaC05g31920D		BnaC02g33540D	BnaA10g26500D
BnaC08g16550D	BnaC08g29390D		BnaC03g07790D	BnaC02g19250D
BnaC08g34250D	BnaC08g29620D		BnaC03g30590D	BnaC03g63410D
BnaC09g18740D	BnaC09g07550D		BnaC03g37850D	BnaC04g15590D
BnaC09g22750D	BnaC09g46280D		BnaC04g29610D	BnaC05g08950D
BnaC09g49580D	BnaC09g49210D		BnaC04g38210D	BnaC07g16220D
BnaA01g27030D	BnaA01g00050D		BnaC05g10510D	BnaC07g32110D
BnaA01g31500D	BnaA02g11200D		BnaC05g16010D	BnaC08g06410D
BnaA04g10380D	BnaA03g25630D		BnaC08g16690D	BnaC08g11450D
BnaA05g14780D	BnaA03g26890D		BnaC09g27430D	BnaC09g21020D
BnaC02g12130D	BnaA06g06850D		BnaA01g08280D	BnaA01g33370D
BnaC02g34150D	BnaA07g07370D		BnaA01g21280D	BnaA03g23260D
BnaC03g41910D	BnaA07g25060D		BnaA03g18210D	BnaA05g27710D
BnaC03g49120D	BnaA08g25770D		BnaA03g46490D	BnaA06g22100D
BnaC04g04180D	BnaA09g09490D		BnaA03g53840D	BnaA09g29790D
BnaC07g18940D	BnaA09g45420D		BnaA04g13580D	BnaA09g38410D
BnaC08g07760D	BnaA09g48160D		BnaA04g17770D	BnaA09g43840D
BnaA01g06090D	BnaA10g03230D		BnaA04g26070D	BnaA10g00510D
BnaA03g41610D	BnaC03g15530D		BnaA06g10160D	BnaA10g15880D
BnaA04g26060D	BnaC03g21880D		BnaA06g22670D	BnaC01g01990D
BnaA07g01860D	BnaC04g08970D		BnaA06g34090D	BnaC01g31400D
BnaA07g23590D	BnaC06g20400D		BnaA07g26840D	BnaC02g16260D
BnaA07g32290D	BnaC08g29360D		BnaA08g01190D	BnaC04g49800D
BnaA10g09400D	BnaA01g28080D		BnaA08g17260D	BnaC06g17090D
BnaC01g14080D	BnaA02g12430D		BnaA09g08450D	BnaC06g20480D
BnaC03g11910D	BnaA02g19850D		BnaC01g20380D	BnaC06g26810D
BnaC03g35000D	BnaA03g32370D		BnaC01g23420D	BnaC07g21660D
BnaC04g22770D	BnaA03g32390D		BnaC03g03320D	BnaC08g09220D
BnaC04g30650D	BnaA05g02550D		BnaC03g09320D	BnaC09g47650D
BnaC04g44940D	BnaA06g32930D		BnaC04g38160D	BnaA02g14980D
BnaC05g42780D	BnaA07g29190D		BnaC04g43140D	BnaA02g21930D
BnaC07g00560D	BnaA09g42250D		BnaC05g02950D	BnaA05g06580D
BnaC07g12680D	BnaA10g03290D		BnaC06g06410D	BnaA06g03490D
BnaC08g07770D	BnaC03g09980D		BnaC06g29900D	BnaA07g32500D
BnaA01g29710D	BnaC03g37790D		BnaC07g28270D	BnaC02g23180D
BnaA03g33450D	BnaC03g44180D		BnaC08g23870D	BnaC02g33670D
BnaA06g09250D	BnaC05g46330D		BnaA01g03630D	BnaC02g37060D
BnaA08g24080D	BnaC07g00250D		BnaA01g05800D	BnaC07g01150D
BnaA09g49340D	BnaC08g18500D		BnaA01g12950D	BnaC08g10600D
BnaA10g05400D	BnaC08g39360D		BnaA01g16250D	BnaA03g22900D
BnaA10g17930D	BnaC08g40080D		BnaA04g00640D	BnaA03g53960D
BnaA10g20110D	BnaC09g05280D		BnaA04g20080D	BnaA04g17220D
BnaC01g02650D	BnaA01g17490D		BnaA05g05350D	BnaA05g06110D
BnaC01g20760D	BnaA02g28130D		BnaA09g06920D	BnaA05g21010D
BnaC04g10210D	BnaA04g27160D		BnaA09g38980D	BnaA05g23740D
BnaC04g24910D	BnaA05g33810D		BnaC02g00180D	BnaA06g30810D
BnaC05g15590D	BnaA06g01540D		BnaC03g13100D	BnaA06g31980D
BnaC05g26610D	BnaA08g17880D		BnaC03g23930D	BnaA08g07710D
BnaC07g08600D	BnaA09g09640D		BnaC03g24290D	BnaA10g10930D
BnaC08g05810D	BnaA09g43240D		BnaC03g39860D	BnaA10g21850D
BnaC09g45410D	BnaC03g45240D		BnaC05g06610D	BnaC02g28050D
BnaA01g08830D	BnaC03g52090D		BnaC05g07810D	BnaC03g08880D
BnaA02g22010D	BnaC04g13660D		BnaC07g37040D	BnaC03g62390D
BnaA03g13190D	BnaC05g00840D		BnaC08g11190D	BnaA02g32750D
BnaA04g01910D	BnaC05g46130D		BnaA01g11340D	BnaA03g37960D
BnaA04g15770D	BnaC06g05040D		BnaA02g33310D	BnaA05g20890D
BnaA05g22740D	BnaC07g30150D		BnaA03g03210D	BnaA05g28090D
BnaA06g30570D	BnaC08g22310D		BnaA03g30890D	BnaA09g12300D
BnaA09g01870D	BnaC09g29940D		BnaA03g54300D	BnaA10g06710D
BnaC02g19780D	BnaC09g44380D		BnaA04g09640D	BnaA10g21250D
BnaC04g40580D	BnaA02g09180D		BnaA05g13240D	BnaC02g25140D
BnaC05g38690D	BnaA03g33640D		BnaA06g04410D	BnaC03g07300D
BnaA03g04160D	BnaA03g43010D		BnaA06g20870D	BnaC03g18040D
BnaA03g15050D	BnaA04g18700D		BnaA06g30820D	BnaC03g25240D
BnaA04g13250D	BnaA05g26760D		BnaA07g31280D	BnaC03g51890D
BnaA07g09640D	BnaA09g10130D		BnaA08g04740D	BnaC04g00390D
BnaA07g31380D	BnaA09g34990D		BnaA08g22960D	BnaC04g02440D
BnaC01g15610D	BnaC03g42560D		BnaA09g04670D	BnaC06g04230D
BnaC03g54120D	BnaC04g33720D		BnaA09g16300D	BnaC06g40720D
BnaC03g57190D	BnaC05g21850D		BnaA09g34220D	BnaC07g42560D
BnaC04g06230D	BnaC06g27680D		BnaA09g47100D	BnaC09g40970D
BnaC06g31440D	BnaC08g10030D		BnaC01g09710D	BnaA04g06420D
BnaC07g47660D	BnaC08g40830D		BnaC01g13590D	BnaA09g29000D
BnaC08g04460D	BnaC09g33040D		BnaC02g04930D	BnaA10g22650D
BnaA03g14060D	BnaA01g26430D		BnaC02g34040D	BnaC02g33250D
BnaA03g28780D	BnaA02g12660D		BnaC03g10410D	BnaC03g27820D
BnaA05g19030D	BnaA03g06960D		BnaC03g15370D	BnaC06g23880D
BnaA06g16330D	BnaA03g07700D		BnaC03g23190D	BnaC08g18690D
BnaA07g03370D	BnaA03g42810D		BnaC04g06710D	BnaA02g13110D
BnaA07g11230D	BnaA05g08410D		BnaC04g46050D	BnaA02g16520D
BnaA07g33440D	BnaA09g37700D		BnaC05g30810D	BnaA04g05290D
BnaA08g16100D	BnaA10g25110D		BnaC07g01930D	BnaA05g00290D
BnaA10g17640D	BnaC03g52150D		BnaC07g30640D	BnaA05g29330D
BnaC03g04710D	BnaC04g01800D		BnaC07g43870D	BnaA07g01550D
BnaC05g17990D	BnaC04g22120D		BnaC08g19380D	BnaC06g17020D
BnaC08g32470D	BnaC04g47760D		BnaC08g22130D	BnaC08g23880D
BnaA02g13660D	BnaC07g19470D		BnaC09g08890D	BnaA01g00900D
BnaA03g04230D	BnaC08g42010D		BnaA01g19100D	BnaA02g20470D
BnaA03g25040D	BnaC09g23920D		BnaA01g31340D	BnaA03g11320D
BnaA04g15010D	BnaC09g43210D		BnaA02g00330D	BnaA03g49600D
BnaA07g14910D	BnaA01g09820D		BnaA02g02990D	BnaA05g10850D
BnaA07g17190D	BnaA02g17450D		BnaA05g18790D	BnaA08g10510D
BnaA07g22910D	BnaA02g24430D		BnaA06g04260D	BnaA09g47860D
BnaA08g12850D	BnaA03g16230D		BnaA06g10060D	BnaC01g24200D
BnaC02g16190D	BnaA03g17250D		BnaA06g30610D	BnaC03g07310D
BnaC03g20580D	BnaA03g49020D		BnaA07g04180D	BnaC05g06860D
BnaC05g41960D	BnaA05g26430D		BnaA07g11270D	BnaC05g38880D
BnaC07g12460D	BnaC02g42820D		BnaA07g13030D	BnaC05g41880D
BnaC07g41250D	BnaC03g11000D		BnaA07g24700D	BnaA07g33960D
BnaC08g34620D	BnaC04g42250D		BnaA08g21270D	BnaA09g22190D
BnaC09g20630D	BnaC05g08490D		BnaA10g08510D	BnaA09g43200D
BnaA01g10360D	BnaC06g35900D		BnaA10g09810D	BnaC01g03850D
BnaA02g13420D	BnaC07g21460D		BnaA10g19040D	BnaC01g15060D
BnaA03g39770D	BnaC07g22870D		BnaC01g33270D	BnaC03g47170D
BnaA03g48010D	BnaC08g30700D		BnaC02g04270D	BnaC03g68960D
BnaA07g08450D	BnaC09g30890D		BnaC03g24640D	BnaC04g30760D
BnaA07g17690D	BnaC09g37960D		BnaC03g30840D	BnaC05g17540D
BnaA07g22780D	BnaA01g30240D		BnaC04g05430D	BnaC06g34820D
BnaA08g20110D	BnaA02g21800D		BnaC07g15760D	BnaC08g29080D
BnaA10g13130D	BnaA04g13840D		BnaC07g32480D	BnaA01g25630D
BnaC02g07990D	BnaA05g06320D		BnaC09g02730D	BnaA02g13580D
BnaC02g20370D	BnaA05g21750D		BnaC09g12460D	BnaA02g24690D
BnaC04g14330D	BnaA06g21390D		BnaC09g16820D	BnaA03g20380D
BnaC04g14950D	BnaA07g27980D		BnaC09g18770D	BnaA04g04070D
BnaC05g02730D	BnaA09g03500D		BnaA02g22310D	BnaA04g09320D
BnaC05g24870D	BnaA09g06500D		BnaA02g30760D	BnaA04g22490D
BnaC05g34690D	BnaA09g40870D		BnaA03g21680D	BnaA04g24300D
BnaC06g02820D	BnaA10g00400D		BnaA03g41400D	BnaA05g08430D
BnaC07g35800D	BnaA10g01790D		BnaA04g25870D	BnaA09g40910D
BnaC07g36600D	BnaC01g01320D		BnaA06g00950D	BnaA10g25390D
BnaC08g45960D	BnaC03g22200D		BnaA06g18930D	BnaC01g35470D
BnaC09g10640D	BnaC05g14080D		BnaA07g27660D	BnaC04g42420D
BnaC09g19860D	BnaC06g20280D		BnaA08g03300D	BnaC06g35350D
BnaA01g34460D	BnaC08g13120D		BnaA08g14520D	BnaC07g26140D
BnaA02g20850D	BnaA01g06140D		BnaA08g26160D	BnaC07g39000D
BnaA03g19080D	BnaA01g06830D		BnaA09g50640D	BnaA05g31990D
BnaA04g20850D	BnaA02g00100D		BnaA10g01450D	BnaA06g27680D
BnaA06g30990D	BnaA03g13240D		BnaC01g11330D	BnaA07g26830D
BnaA06g32750D	BnaA03g36810D		BnaC01g14400D	BnaA08g21220D
BnaA08g26900D	BnaA04g19640D		BnaC01g36370D	BnaA09g13190D
BnaA10g10580D	BnaA08g05680D		BnaC01g40140D	BnaC03g16050D
BnaA10g21750D	BnaA08g13700D		BnaC03g17860D	BnaC06g15320D
BnaC02g38860D	BnaA08g20240D		BnaC03g21710D	BnaA04g13820D
BnaC03g30200D	BnaA10g01590D		BnaC03g23720D	BnaA05g01430D
BnaC03g67520D	BnaC02g06240D		BnaC03g41840D	BnaA05g25610D
BnaC04g23160D	BnaC03g20620D		BnaC03g56440D	BnaA05g31610D
BnaC04g51080D	BnaC03g61330D		BnaC03g57720D	BnaA06g13800D
BnaC05g12620D	BnaC04g05470D		BnaC04g03980D	BnaA07g09920D
BnaC05g24890D	BnaC04g45860D		BnaC04g06800D	BnaA08g18750D
BnaC06g28820D	BnaC05g13950D		BnaC04g33030D	BnaA09g03440D
BnaC07g18260D	BnaC05g30430D		BnaC06g31050D	BnaA09g28070D
BnaA02g00370D	BnaC08g19000D		BnaC07g40430D	BnaC01g05240D
BnaA04g17570D	BnaC08g20380D		BnaA02g03760D	BnaC02g42240D
BnaA05g11400D	BnaA01g02390D		BnaA04g25520D	BnaC05g03650D
BnaA06g08880D	BnaA03g50340D		BnaA05g01990D	BnaC05g38180D
BnaA06g11320D	BnaA05g26090D		BnaA05g24890D	BnaC08g17770D
BnaA06g25570D	BnaA06g10430D		BnaA06g02670D	BnaC09g38720D
BnaA09g28390D	BnaA07g10830D		BnaA07g08700D	BnaA01g17280D
BnaA10g05590D	BnaA08g24680D		BnaA07g35270D	BnaA02g02670D
BnaC04g43220D	BnaA09g24710D		BnaA08g02960D	BnaA03g35990D
BnaC05g06160D	BnaA09g41340D		BnaA08g18730D	BnaA07g17210D
BnaC05g22510D	BnaA10g04850D		BnaA09g01580D	BnaA09g25200D
BnaC07g28250D	BnaC01g21930D		BnaA09g44940D	BnaA09g26820D
BnaC08g36040D	BnaC05g12520D		BnaA10g03080D	BnaC04g10140D
BnaC08g38850D	BnaC05g45040D		BnaA10g10320D	BnaC05g22210D
BnaC09g31390D	BnaC06g34120D		BnaA10g23010D	BnaC07g24340D
BnaC09g35940D	BnaC07g20290D		BnaC01g00280D	BnaC08g06520D
BnaA01g17120D	BnaC07g21120D		BnaC01g11100D	BnaC08g24760D
BnaA02g08400D	BnaC07g44060D		BnaC02g03570D	BnaC09g41420D
BnaA02g25790D	BnaC08g03740D		BnaC03g47240D	BnaA05g29710D
BnaA03g19980D	BnaC08g35850D		BnaC04g08840D	BnaA06g28870D
BnaA03g50990D	BnaC09g18640D		BnaC04g44820D	BnaA08g00310D
BnaA05g17580D	BnaC09g46240D		BnaC05g09860D	BnaA10g10810D
BnaA05g23470D	BnaA01g15430D		BnaC06g28780D	BnaC03g24080D
BnaA06g32890D	BnaA02g19150D		BnaC06g40370D	BnaC04g03920D
BnaA06g34190D	BnaA02g26640D		BnaC07g24810D	BnaC05g18220D
BnaA07g34190D	BnaA03g12800D		BnaC08g21750D	BnaC05g37370D
BnaA07g35160D	BnaA03g49960D		BnaC09g00200D	BnaC07g34080D
BnaA09g17960D	BnaA05g01790D		BnaC09g01160D	BnaC08g08490D
BnaA09g19250D	BnaA05g32540D		BnaC09g41280D	BnaC08g36020D
BnaC01g16450D	BnaA06g21460D		BnaC09g49620D	BnaC09g15060D
BnaC02g04180D	BnaA06g27830D		BnaA02g22590D	BnaC09g18390D
BnaC02g25100D	BnaA07g28690D		BnaA03g00180D	BnaA01g17650D
BnaC05g37000D	BnaA07g33960D		BnaA03g18650D	BnaA02g04670D
BnaC08g09430D	BnaA09g27270D		BnaA03g35960D	BnaA02g26530D
BnaC09g24890D	BnaA09g36660D		BnaA03g42420D	BnaA04g24180D
BnaA03g11480D	BnaC02g31120D		BnaA03g42990D	BnaA06g20930D
BnaA03g34760D	BnaC03g46230D		BnaA03g44480D	BnaA06g23070D
BnaA05g00710D	BnaC03g61720D		BnaA05g19550D	BnaA09g27140D
BnaA06g31430D	BnaC05g11590D		BnaA05g32650D	BnaC01g27600D
BnaA09g43930D	BnaC06g35380D		BnaA07g23380D	BnaC02g12920D
BnaA10g19330D	BnaC07g31220D		BnaA07g28210D	BnaC03g28710D
BnaA10g22800D	BnaC09g11530D		BnaA09g22060D	BnaC03g44380D
BnaC03g60950D	BnaA01g11090D		BnaA09g38030D	BnaC05g06880D
BnaC04g22610D	BnaA02g04960D		BnaA10g09070D	BnaC05g48350D
BnaC05g19810D	BnaA02g08160D		BnaA10g20580D	BnaC07g41330D
BnaC05g28680D	BnaA02g13820D		BnaA10g23150D	BnaC08g23850D
BnaC08g09560D	BnaA03g15390D		BnaA10g23420D	BnaA02g08350D
BnaA01g15900D	BnaA03g23840D		BnaC01g00440D	BnaA03g33160D
BnaA03g14010D	BnaA06g00980D		BnaC02g16150D	BnaA03g44860D
BnaA05g08850D	BnaA07g06110D		BnaC03g22070D	BnaA04g19340D
BnaA06g26050D	BnaA08g02530D		BnaC03g33090D	BnaA05g07020D
BnaC01g01280D	BnaA09g00720D		BnaC03g53690D	BnaA07g14540D
BnaC01g21880D	BnaA09g40440D		BnaC05g44310D	BnaA09g33230D
BnaC02g40430D	BnaA10g15850D		BnaC06g07410D	BnaA09g47360D
BnaC03g41280D	BnaC01g05630D		BnaC06g11330D	BnaC02g28130D
BnaC03g55780D	BnaC01g19960D		BnaC07g11240D	BnaC03g28410D
BnaC04g02860D	BnaC03g67800D		BnaC07g38750D	BnaC05g13150D
BnaC04g05710D	BnaC04g15960D		BnaC08g31940D	BnaC06g04100D
BnaC06g15890D	BnaC06g36020D		BnaC09g00520D	BnaC06g18300D
BnaC06g26900D	BnaA01g09940D		BnaA03g00460D	BnaC06g40410D
BnaC07g09900D	BnaA01g23170D		BnaA04g03970D	BnaA03g37320D
BnaC09g35690D	BnaA02g01390D		BnaA05g02820D	BnaC08g18190D
BnaA02g27130D	BnaA02g24780D		BnaA05g16820D	BnaA01g31600D
BnaA03g46030D	BnaA02g32440D		BnaA05g31920D	BnaC01g14150D
BnaA06g02540D	BnaA05g07670D		BnaA09g03620D	BnaC03g11260D
BnaA06g14840D	BnaA06g22640D		BnaA09g46590D	BnaC05g11590D
BnaA08g22770D	BnaA07g31710D		BnaC02g14940D	BnaC05g45920D
BnaA09g05830D	BnaA07g35030D		BnaC02g33360D	BnaC08g29520D
BnaA09g50940D	BnaA08g20180D		BnaC04g26720D	BnaC09g10570D
BnaC07g04990D	BnaA09g09610D		BnaC04g44850D	BnaA01g09740D
BnaC08g25580D	BnaA09g29760D		BnaC05g13040D	BnaA02g08330D
BnaC09g00750D	BnaA10g06690D		BnaC06g27570D	BnaA03g49050D
BnaC09g48700D	BnaA10g09520D		BnaC07g07420D	BnaA04g14190D
BnaA01g08360D	BnaA10g27170D		BnaC07g34490D	BnaA05g13150D
BnaA01g21090D	BnaC03g59270D		BnaC08g29150D	BnaA06g22960D
BnaA04g07370D	BnaC03g59440D		BnaC09g33860D	BnaA07g29060D
BnaA04g07650D	BnaC04g12000D		BnaA01g16450D	BnaC01g03890D
BnaA05g01450D	BnaC04g32060D		BnaA03g06130D	BnaC03g63020D
BnaA05g04550D	BnaC07g07930D		BnaA03g09690D	BnaC04g42050D
BnaA09g32890D	BnaC07g22950D		BnaA04g09860D	BnaC05g47740D
BnaA10g11970D	BnaC07g25770D		BnaA06g06880D	BnaC07g42280D
BnaA10g12500D	BnaC08g18620D		BnaA06g07030D	BnaC08g30580D
BnaC01g05950D	BnaC08g20160D		BnaA08g07670D	BnaC08g44230D
BnaC02g31660D	BnaC08g22990D		BnaA09g28020D	BnaA01g00380D
BnaC03g10410D	BnaC09g49710D		BnaA09g38740D	BnaA01g05280D
BnaC03g60770D	BnaA01g02570D		BnaC01g00720D	BnaA05g30940D
BnaC03g68250D	BnaA01g20390D		BnaC01g21640D	BnaA08g26070D
BnaC07g10220D	BnaA01g27720D		BnaC02g04830D	BnaA09g11790D
BnaC08g09270D	BnaA01g31810D		BnaC02g34740D	BnaA09g31790D
BnaC08g16760D	BnaA02g31970D		BnaC03g06820D	BnaC04g01900D
BnaA01g17910D	BnaA03g20860D		BnaC03g41860D	BnaC04g26680D
BnaA02g29570D	BnaA04g24990D		BnaC03g58780D	BnaC04g43680D
BnaA03g02990D	BnaA04g26210D		BnaC04g28890D	BnaC05g05380D
BnaA04g05950D	BnaA06g26720D		BnaC04g50300D	BnaC06g16040D
BnaA04g12610D	BnaA07g04680D		BnaC05g01510D	BnaC06g29050D
BnaA09g08900D	BnaA07g32230D		BnaC05g10140D	BnaC06g38510D
BnaC01g19170D	BnaA08g25580D		BnaC05g10200D	BnaC07g18440D
BnaC03g14080D	BnaA09g15660D		BnaC05g13250D	BnaC08g10180D
BnaC03g49260D	BnaA09g47270D		BnaC05g24630D	BnaC09g49780D
BnaC04g11030D	BnaA10g15010D		BnaC05g47330D	BnaA01g32040D
BnaC07g34470D	BnaA10g25400D		BnaC06g29260D	BnaA02g08140D
BnaC08g00650D	BnaC03g19070D		BnaC06g30850D	BnaA03g13460D
BnaC08g14940D	BnaC03g39280D		BnaC08g40470D	BnaA07g14020D
BnaC09g23050D	BnaC04g29150D		BnaC09g20110D	BnaA07g14180D
BnaC09g36480D	BnaC06g26150D		BnaC09g44570D	BnaA10g08400D
BnaA02g22720D	BnaC07g39460D		BnaA01g22250D	BnaC05g05070D
BnaA02g32360D	BnaC09g21020D		BnaA01g29690D	BnaC05g22500D
BnaA05g26380D	BnaA01g28330D		BnaA02g12280D	BnaC06g12180D
BnaA09g46660D	BnaA01g29420D		BnaA03g39550D	BnaC08g03580D
BnaC02g01710D	BnaA05g33110D		BnaA05g08720D	BnaC08g29330D
BnaC02g34830D	BnaA06g06240D		BnaA05g18580D	BnaA03g05500D
BnaC03g07740D	BnaA06g23870D		BnaA07g10580D	BnaA05g23510D
BnaC03g10720D	BnaA09g21320D		BnaA07g24770D	BnaA06g27230D
BnaC03g65050D	BnaA10g05520D		BnaA08g01500D	BnaA07g33700D
BnaC06g22780D	BnaA10g14560D		BnaA09g09870D	BnaA08g07210D
BnaC06g39400D	BnaC01g15140D		BnaA09g38260D	BnaA08g27230D
BnaC07g39640D	BnaC03g57690D		BnaC01g10500D	BnaC04g47050D
BnaC08g17050D	BnaC04g36640D		BnaC02g07210D	BnaC05g00430D
BnaC08g22290D	BnaC07g04810D		BnaC02g17710D	BnaC07g21670D
BnaC09g36370D	BnaC07g40400D		BnaC02g40560D	BnaC08g45900D
BnaA05g32310D	BnaC08g09500D		BnaC03g01870D	BnaA01g17950D
BnaA06g36950D	BnaC08g35790D		BnaC03g06570D	BnaA04g15240D
BnaA09g13800D	BnaC09g45510D		BnaC03g14520D	BnaA05g33310D
BnaA09g44370D	BnaA02g00880D		BnaC03g33710D	BnaA07g02900D
BnaC03g18150D	BnaA02g13340D		BnaC04g35520D	BnaA09g13320D
BnaC03g57980D	BnaA04g13630D		BnaC04g36260D	BnaA10g17590D
BnaC06g10370D	BnaA05g20130D		BnaC04g36930D	BnaA10g21980D
BnaC07g03220D	BnaA05g24110D		BnaC04g44610D	BnaC01g09890D
BnaC07g03480D	BnaA06g34580D		BnaC05g00580D	BnaC03g54720D
BnaC08g11040D	BnaA07g28390D		BnaC05g17460D	BnaC04g40110D
BnaC08g21640D	BnaA09g50160D		BnaC05g46580D	BnaC05g37220D
BnaA01g14890D	BnaA10g27670D		BnaC06g40220D	BnaC07g44210D
BnaA01g23270D	BnaC03g05920D		BnaC07g17070D	BnaC08g17570D
BnaA02g01500D	BnaC03g24920D		BnaC07g27240D	BnaC09g29660D
BnaA05g19270D	BnaC03g67480D		BnaC08g15260D	BnaA02g02910D
BnaA06g07700D	BnaC04g28760D		BnaA01g26490D	BnaA05g32830D
BnaA06g16470D	BnaC04g34730D		BnaA03g01460D	BnaA07g07300D
BnaA07g35750D	BnaC05g35830D		BnaA03g20920D	BnaA07g30260D
BnaA09g31080D	BnaC06g05240D		BnaA03g40590D	BnaA08g01710D
BnaA09g48730D	BnaC06g10960D		BnaA05g10680D	BnaC03g08430D
BnaC01g36650D	BnaA01g20420D		BnaA05g10690D	BnaC04g50870D
BnaC02g32150D	BnaA03g02940D		BnaA05g28300D	BnaC06g08890D
BnaC03g11290D	BnaA03g06340D		BnaA06g05940D	BnaC06g32970D
BnaC03g61570D	BnaA03g30380D		BnaA06g11730D	BnaC09g07150D
BnaC04g38830D	BnaA04g12120D		BnaA07g16600D	BnaC09g24080D
BnaC05g33090D	BnaA04g21650D		BnaA09g05430D	BnaA05g14880D
BnaC05g41600D	BnaA04g24180D		BnaA09g40670D	BnaA08g04160D
BnaC07g19680D	BnaA06g09970D		BnaC01g13780D	BnaA10g27170D
BnaC07g39860D	BnaA06g18510D		BnaC02g02350D	BnaC01g08460D
BnaC08g44770D	BnaA07g20380D		BnaC02g19190D	BnaC01g31300D
BnaC09g26160D	BnaA07g24970D		BnaC03g11960D	BnaC04g47200D
BnaA01g26100D	BnaA07g32300D		BnaC04g12230D	BnaA01g03360D
BnaA04g02450D	BnaA08g19810D		BnaC05g08550D	BnaA02g09470D
BnaA04g03410D	BnaA08g21000D		BnaC05g10870D	BnaA02g33110D
BnaA07g32770D	BnaA09g41000D		BnaC05g28970D	BnaA03g09060D
BnaA08g28250D	BnaC01g03240D		BnaC07g24290D	BnaA03g20610D
BnaA09g20520D	BnaC04g45800D		BnaC08g02240D	BnaA04g07800D
BnaC02g04750D	BnaC05g02520D		BnaC08g44970D	BnaA08g16650D
BnaC02g10070D	BnaC05g39640D		BnaC09g00180D	BnaA09g14700D
BnaC02g28090D	BnaC08g42330D		BnaC09g31810D	BnaA10g23180D
BnaC02g33850D	BnaC09g47390D		BnaC09g36900D	BnaC03g00390D
BnaC05g02310D	BnaA01g00310D		BnaA02g22340D	BnaC04g03850D
BnaC05g03950D	BnaA02g22810D		BnaA02g29070D	BnaC09g04500D
BnaC05g16500D	BnaA03g38540D		BnaA03g44440D
BnaC07g17420D	BnaA04g12110D		BnaA04g00350D
BnaC09g50260D	BnaA04g13920D		BnaA04g19680D
BnaA03g24190D	BnaA04g18690D		BnaA05g03180D
BnaA04g08000D	BnaA07g18590D		BnaA05g26120D
BnaA06g02980D	BnaA07g21510D		BnaA06g06710D
BnaA06g13120D	BnaA07g30970D		BnaA06g11030D
BnaA07g19430D	BnaA07g32550D		BnaA07g00210D
BnaC01g00410D	BnaA09g42420D		BnaA08g02160D
BnaC03g14240D	BnaC01g07030D		BnaA09g03230D
BnaC04g46540D	BnaC03g54250D		BnaA09g06890D
BnaC07g23230D	BnaC03g64740D		BnaA10g01070D
BnaC08g35770D	BnaC04g25110D		BnaC02g27830D
BnaC09g00290D	BnaC04g28800D		BnaC03g39150D
BnaA02g31650D	BnaC05g05940D		BnaC03g49750D
BnaA03g11680D	BnaC05g15430D		BnaC03g65340D
BnaA04g21710D	BnaC07g46780D		BnaC04g00310D
BnaA05g00770D	BnaC08g31280D		BnaC05g36580D
BnaA07g28340D	BnaC08g34640D		BnaC06g33940D
BnaA09g03160D	BnaC08g37730D		BnaC07g02850D
BnaA09g48460D	BnaC09g01690D		BnaC08g03590D
BnaC01g25770D	BnaA01g12790D		BnaC09g28190D
BnaC02g39260D	BnaA03g06790D		BnaC09g31990D
BnaC03g04830D	BnaA05g19890D		BnaA01g30960D
BnaC04g46080D	BnaA05g22170D		BnaA02g30600D
BnaC05g39180D	BnaA06g07430D		BnaA03g16920D
BnaC06g37250D	BnaA07g14650D		BnaA05g05320D
BnaC08g11620D	BnaA07g25020D		BnaA06g03780D
BnaC08g18780D	BnaA08g02510D		BnaA07g04670D
BnaC08g19130D	BnaA08g09190D		BnaA08g00660D
BnaC09g04170D	BnaA09g13510D		BnaA09g13880D
BnaC09g17850D	BnaA09g24640D		BnaA09g49510D
BnaA03g39710D	BnaA09g44220D		BnaA10g11600D
BnaA07g27320D	BnaA10g15210D		BnaA10g15920D
BnaA09g22180D	BnaC02g03710D		BnaA10g22540D
BnaC02g04540D	BnaC02g17500D		BnaC01g10140D
BnaC02g09160D	BnaC02g31800D		BnaC01g36420D
BnaC05g20880D	BnaC03g32130D		BnaC01g40440D
BnaC08g26100D	BnaC03g50950D		BnaC02g02700D
BnaC09g04270D	BnaC04g04390D		BnaC02g13590D
BnaC09g05200D	BnaC05g39470D		BnaC03g21960D
BnaC09g12030D	BnaC06g18300D		BnaC03g34470D
BnaA02g21220D	BnaC07g15830D		BnaC03g48460D
BnaA03g48080D	BnaC07g43130D		BnaC04g02530D
BnaA04g00710D	BnaC08g24700D		BnaC04g41240D
BnaA05g15180D	BnaA02g13220D		BnaC06g20090D
BnaA07g04760D	BnaA03g02040D		BnaC07g14380D
BnaA07g12420D	BnaA03g13300D		BnaC07g36930D
BnaA07g17580D	BnaA03g36850D		BnaC09g27370D
BnaA08g24140D	BnaA03g49640D		BnaA01g23310D
BnaA10g04630D	BnaA04g02530D		BnaA02g28870D
BnaA10g24650D	BnaA04g20010D		BnaA05g05920D
BnaA10g25600D	BnaA05g05360D		BnaA05g13760D
BnaC01g09910D	BnaA05g09690D		BnaA08g00430D
BnaC03g51020D	BnaA06g06330D		BnaA09g26660D
BnaC03g62040D	BnaA06g19590D		BnaA10g25640D
BnaC03g69560D	BnaA08g16330D		BnaC01g18770D
BnaC05g35600D	BnaC01g33220D		BnaC01g40630D
BnaC08g20780D	BnaC01g35880D		BnaC02g23130D
BnaC08g45580D	BnaC02g04210D		BnaC05g17100D
BnaA02g26500D	BnaC02g41100D		BnaC05g34850D
BnaA03g19280D	BnaC03g34170D		BnaC07g07130D
BnaA03g26510D	BnaC04g10380D		BnaC09g15340D
BnaA03g32150D	BnaC05g35840D		BnaC09g24880D
BnaA03g36540D	BnaC05g43730D		BnaA01g15310D
BnaA06g26490D	BnaC06g27290D		BnaA02g14290D
BnaA07g23320D	BnaC06g28860D		BnaA03g46750D
BnaA08g11660D	BnaC06g38600D		BnaA03g47800D
BnaA10g01170D	BnaC07g19700D		BnaA04g03000D
BnaC01g18910D	BnaC07g30750D		BnaA04g05780D
BnaC03g19740D	BnaC07g33090D		BnaA05g23310D
BnaC03g69360D	BnaC08g01890D		BnaA05g28850D
BnaC05g45570D	BnaC08g05770D		BnaA06g25480D
BnaC06g35390D	BnaC08g28250D		BnaA07g25080D
BnaA01g21490D	BnaC08g46050D		BnaA07g30890D
BnaA03g28280D	BnaC09g49030D		BnaA09g09570D
BnaA03g33290D	BnaA01g18550D		BnaA09g09890D
BnaA05g02610D	BnaA01g18970D		BnaA09g45870D
BnaA05g05150D	BnaA02g13920D		BnaA10g10830D
BnaA06g21760D	BnaA02g30210D		BnaA10g25610D
BnaA09g30200D	BnaA02g31240D		BnaC01g19970D
BnaC02g07100D	BnaA05g32830D		BnaC03g06160D
BnaC02g34020D	BnaA06g08610D		BnaC03g12490D
BnaC08g37870D	BnaA06g14070D		BnaC03g39270D
BnaA03g51630D	BnaA06g36780D		BnaC04g00800D
BnaA04g10430D	BnaA09g03010D		BnaC04g40080D
BnaA04g11650D	BnaA09g42330D		BnaC05g12440D
BnaA05g09130D	BnaA09g44980D		BnaC05g13160D
BnaA05g13700D	BnaA10g21480D		BnaC07g26770D
BnaA07g15170D	BnaA10g24000D		BnaC07g31140D
BnaA09g21150D	BnaC02g39800D		BnaC09g15480D
BnaA09g32880D	BnaC03g25880D		BnaC09g26860D
BnaA09g41660D	BnaC04g02370D		BnaA05g32250D
BnaA10g02850D	BnaC05g07910D		BnaA07g07960D
BnaC07g27860D	BnaC06g00610D		BnaA07g15410D
BnaA01g18370D	BnaC06g27200D		BnaA07g18010D
BnaA01g25020D	BnaC06g31270D		BnaA08g18790D
BnaA02g17250D	BnaA01g13510D		BnaA08g25900D
BnaA06g07040D	BnaA02g33100D		BnaA08g26200D
BnaA06g27290D	BnaA03g25660D		BnaA09g47400D
BnaA09g10810D	BnaA03g42870D		BnaC01g06790D
BnaA10g20200D	BnaA04g24680D		BnaC01g15930D
BnaC01g08620D	BnaA07g29680D		BnaC01g31410D
BnaC01g26460D	BnaA08g17760D		BnaC03g55280D
BnaC03g12360D	BnaA08g21970D		BnaC04g47730D
BnaC04g02060D	BnaA09g48680D		BnaC04g51400D
BnaC04g42120D	BnaA10g02500D		BnaC05g15660D
BnaC06g20350D	BnaC01g12470D		BnaC05g23530D
BnaC07g04100D	BnaC01g36100D		BnaC06g04040D
BnaC07g16450D	BnaC03g19340D		BnaC06g13680D
BnaA03g43160D	BnaC03g68000D		BnaC06g22790D
BnaA05g03100D	BnaC04g21660D		BnaC07g06190D
BnaA05g22770D	BnaC04g25280D		BnaC08g16950D
BnaA07g11920D	BnaC04g28970D		BnaC08g41190D
BnaA09g20980D	BnaC05g10980D		BnaC09g36760D
BnaC01g18690D	BnaC05g31680D		BnaC09g38570D
BnaC03g03760D	BnaC05g35150D		BnaC09g48550D
BnaC03g09680D	BnaC05g35940D		BnaA01g14970D
BnaC05g23830D	BnaC06g33850D		BnaA01g25590D
BnaC06g19560D	BnaC06g36090D		BnaA02g14690D
BnaC08g01650D	BnaC07g26190D		BnaA03g15030D
BnaC08g24820D	BnaC07g29450D		BnaA03g23000D
BnaA02g17930D	BnaC08g03340D		BnaA07g05410D
BnaA04g07840D	BnaC08g35720D		BnaA10g05830D
BnaA07g13700D	BnaC09g30900D		BnaA10g12160D
BnaA09g06250D	BnaA01g11380D		BnaA10g13380D
BnaC01g34450D	BnaA03g51870D		BnaA10g24920D
BnaC03g42470D	BnaA03g52880D		BnaC01g02660D
BnaC04g18440D	BnaA04g12950D		BnaC02g01520D
BnaC05g12860D	BnaA05g15420D		BnaC03g28540D
BnaC07g36810D	BnaA05g16250D		BnaC03g33570D
BnaC08g26750D	BnaA05g20540D		BnaC04g40150D
BnaC08g30000D	BnaA06g02050D		BnaC06g02740D
BnaA01g17960D	BnaA07g13790D		BnaC09g13680D
BnaA03g49980D	BnaA10g07110D		BnaC09g33500D
BnaA04g24830D	BnaC01g12590D		BnaA01g15350D
BnaA07g13190D	BnaC01g18660D		BnaA03g04600D
BnaA09g51530D	BnaC02g24660D		BnaA05g00020D
BnaC01g07700D	BnaC03g49360D		BnaA05g26950D
BnaC02g17680D	BnaC03g50160D		BnaA08g08050D
BnaC05g21220D	BnaC03g66190D		BnaC01g03980D
BnaC06g10000D	BnaC04g09510D		BnaC01g12790D
BnaC09g34210D	BnaC05g13520D		BnaC01g15970D
BnaC09g34370D	BnaC07g13510D		BnaC01g20120D
BnaA02g29950D	BnaC07g33650D		BnaC01g22140D
BnaA07g13120D	BnaC08g00850D		BnaC02g05930D
BnaA08g07440D	BnaC08g20620D		BnaC03g15280D
BnaC01g35590D	BnaC08g23450D		BnaC03g51640D
BnaC02g17940D	BnaC09g43040D		BnaC03g63260D
BnaC06g05810D	BnaA01g03290D		BnaC05g04800D
BnaC07g34170D	BnaA01g32440D		BnaC06g20970D
BnaC08g32310D	BnaA03g36700D		BnaC07g11260D
BnaA04g05890D	BnaA04g15230D		BnaC08g12250D
BnaA05g06730D	BnaA04g15560D		BnaC08g46080D
BnaA07g22190D	BnaA04g19890D		BnaC09g11750D
BnaC04g03080D	BnaA05g05370D		BnaA01g17340D
BnaC08g01850D	BnaA05g18150D		BnaA01g23560D
BnaC08g09370D	BnaA05g21240D		BnaA03g10010D
BnaA01g15500D	BnaA05g28890D		BnaA05g22820D
BnaA02g00360D	BnaA06g16140D		BnaA06g17680D
BnaA02g33620D	BnaA06g24690D		BnaA08g16010D
BnaA03g44950D	BnaA07g15300D		BnaA08g21280D
BnaA05g02300D	BnaA08g01830D		BnaC02g16270D
BnaA08g06260D	BnaA08g09060D		BnaC03g43210D
BnaC01g36430D	BnaA08g17820D		BnaC04g42950D
BnaC03g68260D	BnaA09g00660D		BnaC05g00740D
BnaC05g04530D	BnaA09g13660D		BnaC06g14210D
BnaC05g06580D	BnaA09g49760D		BnaC06g14550D
BnaC08g00210D	BnaA10g16050D		BnaC07g23410D
BnaC08g16360D	BnaC01g20480D		BnaC08g19420D
BnaC08g39080D	BnaC01g37460D		BnaC08g25590D
BnaC09g19220D	BnaC02g24780D		BnaC08g40020D
BnaA03g31830D	BnaC03g14450D		BnaA01g15200D
BnaA03g44280D	BnaC03g44380D		BnaA02g12030D
BnaC04g50190D	BnaC04g38130D		BnaA02g26620D
BnaC09g09160D	BnaC04g43460D		BnaA05g10880D
BnaA02g21450D	BnaC05g34180D		BnaA06g29700D
BnaA05g32800D	BnaC06g01580D		BnaA06g32580D
BnaA07g06820D	BnaC07g22840D		BnaA06g35900D
BnaA08g23060D	BnaC09g29000D		BnaA09g30210D
BnaA08g28240D	BnaC09g44300D		BnaA10g17210D
BnaA09g00050D	BnaA02g05210D		BnaC01g14290D
BnaA10g02330D	BnaA02g33760D		BnaC02g12970D
BnaC01g16520D	BnaA03g03280D		BnaC02g16420D
BnaC03g06690D	BnaA03g20540D		BnaC02g26130D
BnaC04g06710D	BnaA05g16350D		BnaC03g14080D
BnaC05g11830D	BnaA05g21550D		BnaC06g22500D
BnaC05g37500D	BnaA09g12710D		BnaC06g27150D
BnaC06g15260D	BnaA09g25520D		BnaC08g34620D
BnaC06g27840D	BnaC01g22510D		BnaC09g02460D
BnaA03g12390D	BnaC03g16980D		BnaC09g27740D
BnaA03g51420D	BnaC03g29260D		BnaA01g25330D
BnaA05g21030D	BnaC03g44790D		BnaA01g32410D
BnaA06g29400D	BnaC03g50170D		BnaA04g22670D
BnaC02g22770D	BnaC03g52370D		BnaA04g24010D
BnaC06g12850D	BnaC04g06290D		BnaA04g27190D
BnaA03g00310D	BnaC04g09850D		BnaA05g02230D
BnaA07g22110D	BnaC06g00580D		BnaA05g06870D
BnaA07g32000D	BnaC06g16540D		BnaA06g34160D
BnaC07g12900D	BnaC06g40660D		BnaA07g06050D
BnaC09g36460D	BnaC07g02390D		BnaA07g23580D
BnaC09g36670D	BnaC07g23550D		BnaA07g29520D
BnaA04g00820D	BnaC07g28690D		BnaA07g32630D
BnaC05g11630D	BnaC08g32320D		BnaA08g17310D
BnaC05g20600D	BnaC08g33560D		BnaA10g09480D
BnaC05g29010D	BnaC09g00910D		BnaC01g17150D
BnaC06g01190D	BnaC09g12250D		BnaC02g01090D
BnaA06g16570D	BnaC09g47650D		BnaC03g01700D
BnaC03g49670D	BnaA01g13470D		BnaC04g39200D
BnaC05g46670D	BnaA01g17700D		BnaC05g35380D
BnaC09g45520D	BnaA01g25390D		BnaC06g38450D
BnaA02g01440D	BnaA03g05490D		BnaC06g39520D
BnaC02g06670D	BnaA03g05790D		BnaC07g43120D
BnaC04g48870D	BnaA03g14150D		BnaC08g16510D
BnaA05g05850D	BnaA03g29290D		BnaC09g39360D
BnaA05g24950D	BnaA03g31490D		BnaA05g30660D
BnaC02g04280D	BnaA03g39200D		BnaA06g10780D
BnaC04g36210D	BnaA04g16500D		BnaA06g29020D
BnaA03g00790D	BnaA04g23900D		BnaA09g06590D
BnaA04g03880D	BnaA05g03760D		BnaC03g43570D
BnaA07g15060D	BnaA06g11460D		BnaC05g46500D
BnaA09g48960D	BnaA06g27950D		BnaC06g11940D
BnaC01g39920D	BnaA06g33260D		BnaC09g50190D
BnaC04g42900D	BnaA07g12900D		BnaA01g16600D
BnaA06g30820D	BnaA07g14830D		BnaA01g25500D
BnaA08g13310D	BnaA07g19750D		BnaA02g05130D
BnaC02g42260D	BnaA07g33500D		BnaA03g35410D
BnaC03g50530D	BnaA08g19490D		BnaA07g21580D
BnaC05g00880D	BnaA09g10720D		BnaA10g04880D
BnaC06g24340D	BnaA09g48190D		BnaC01g02400D
BnaA01g02130D	BnaC01g03140D		BnaC01g14070D
BnaA02g20620D	BnaC01g03650D		BnaC01g22030D
BnaA04g23260D	BnaC03g03880D		BnaC02g10900D
BnaA07g30670D	BnaC03g38410D		BnaC02g27110D
BnaC03g11820D	BnaC03g70920D		BnaC04g18530D
BnaC08g25120D	BnaC04g09490D		BnaC04g40260D
BnaC08g39700D	BnaC04g16480D		BnaC05g13660D
BnaC09g44630D	BnaC04g50330D		BnaC05g26360D
BnaA08g03630D	BnaC05g21200D		BnaC06g12560D
BnaC01g21170D	BnaC05g28570D		BnaC07g34460D
BnaC06g34900D	BnaC06g12520D		BnaC07g43020D
BnaA01g27570D	BnaC06g15850D		BnaC07g43400D
BnaA05g14620D	BnaC06g23440D		BnaC08g02120D
BnaA07g17140D	BnaC07g12700D		BnaC08g45160D
BnaA07g33860D	BnaC07g16290D		BnaC09g39350D
BnaC04g05500D	BnaC09g21460D		BnaA01g19170D
BnaA01g23870D	BnaC09g38920D		BnaA02g03340D
BnaA03g45540D	BnaA01g13860D		BnaA03g10410D
BnaA10g20610D	BnaA01g14750D		BnaA03g34450D
BnaC08g15860D	BnaA04g07660D		BnaA08g20660D
BnaC09g43980D	BnaA04g15180D		BnaA09g06860D
BnaA04g14260D	BnaA05g22550D		BnaA09g51460D
BnaA09g07700D	BnaA06g05260D		BnaA10g13800D
BnaA09g29520D	BnaA06g34430D		BnaC03g26080D
BnaC01g10160D	BnaA07g19110D		BnaC04g38100D
BnaC05g05510D	BnaA08g03720D		BnaC05g02740D
BnaC06g31070D	BnaA08g09510D		BnaC06g21290D
BnaC07g44010D	BnaA08g10090D		BnaC09g02740D
BnaC08g13590D	BnaA09g03060D		BnaC09g43100D
BnaA01g19710D	BnaA09g26010D		BnaA01g17710D
BnaA03g00770D	BnaA09g30760D		BnaA01g20610D
BnaA03g23190D	BnaA09g31610D		BnaA02g05160D
BnaA03g48520D	BnaA09g32010D		BnaA03g51790D
BnaA03g52770D	BnaA09g36380D		BnaA04g17640D
BnaA07g30720D	BnaA10g09010D		BnaA04g24720D
BnaA09g23770D	BnaA10g10750D		BnaA05g25880D
BnaC02g27430D	BnaC01g14340D		BnaA06g02940D
BnaC05g05980D	BnaC02g07600D		BnaA06g08840D
BnaC05g46210D	BnaC02g10130D		BnaA06g13770D
BnaA01g19470D	BnaC02g41980D		BnaA06g24670D
BnaA05g19900D	BnaC02g42090D		BnaA07g12970D
BnaC06g38970D	BnaC03g56960D		BnaA08g16360D
BnaC07g26220D	BnaC03g60410D		BnaA09g15330D
BnaA04g18390D	BnaC04g24950D		BnaA10g17150D
BnaA06g03100D	BnaC06g08160D		BnaA10g22290D
BnaA08g11320D	BnaC07g36690D		BnaC02g04320D
BnaC05g18050D	BnaC07g45080D		BnaC02g43620D
BnaC09g46530D	BnaC08g20070D		BnaC04g01980D
BnaA05g04720D	BnaC08g32420D		BnaC04g10080D
BnaA05g14040D	BnaC09g47120D		BnaC04g27450D
BnaA10g14320D	BnaA01g03800D		BnaC04g29950D
BnaC03g52480D	BnaA01g05670D		BnaC05g20300D
BnaC05g23890D	BnaA02g07770D		BnaC06g09290D
BnaC07g14110D	BnaA03g03550D		BnaC06g22530D
BnaC08g30850D	BnaA03g05650D		BnaC07g43550D
BnaA01g24680D	BnaA04g04450D		BnaC07g46150D
BnaA07g26290D	BnaA04g24940D		BnaA03g06490D
BnaA08g08820D	BnaA06g32840D		BnaA04g00610D
BnaC02g20910D	BnaA07g06910D		BnaA04g14260D
BnaC03g65340D	BnaA07g15660D		BnaA08g20060D
BnaC04g12620D	BnaA07g26720D		BnaA10g11220D
BnaA06g20870D	BnaA08g21400D		BnaA10g19580D
BnaA09g41930D	BnaA09g14590D		BnaC01g00030D
BnaC01g20800D	BnaA09g19490D		BnaC01g20770D
BnaC05g04270D	BnaA09g27950D		BnaC02g13020D
BnaC05g13360D	BnaA09g30180D		BnaC02g23290D
BnaC06g27850D	BnaA09g30330D		BnaC02g32710D
BnaC08g32290D	BnaA09g47890D		BnaC03g40800D
BnaC09g48260D	BnaA10g14040D		BnaC04g21400D
BnaA02g25780D	BnaC01g16700D		BnaC04g25310D
BnaA03g10430D	BnaC01g22400D		BnaC06g17440D
BnaA03g25340D	BnaC03g23150D		BnaC07g44290D
BnaA06g00630D	BnaC03g46560D		BnaC08g30200D
BnaA07g35810D	BnaC04g07260D		BnaC08g35230D
BnaC03g13100D	BnaC05g08850D		BnaC09g44410D
BnaC04g09070D	BnaC05g08970D		BnaA01g34080D
BnaC09g01170D	BnaC05g11920D		BnaA03g14090D
BnaA03g31990D	BnaC05g24270D		BnaA03g53540D
BnaA04g02290D	BnaC06g39350D		BnaA04g24570D
BnaA08g26920D	BnaC07g19620D		BnaA06g25550D
BnaA09g20660D	BnaC07g33400D		BnaA08g23900D
BnaC03g00010D	BnaC08g02710D		BnaA09g23070D
BnaC04g34350D	BnaC08g14460D		BnaA09g46830D
BnaC04g42560D	BnaC08g40650D		BnaC01g02000D
BnaC08g16000D	BnaA01g21070D		BnaC01g36120D
BnaA05g07060D	BnaA01g27330D		BnaC02g35020D
BnaA08g01500D	BnaA02g18370D		BnaC03g66940D
BnaA09g17560D	BnaA02g33960D		BnaC04g23270D
BnaC03g14420D	BnaA03g01330D		BnaC05g22090D
BnaC03g37660D	BnaA03g26810D		BnaC05g22240D
BnaC09g46040D	BnaA03g50280D		BnaC06g18360D
BnaA03g07650D	BnaA03g52060D		BnaC06g21230D
BnaA03g45640D	BnaA06g03760D		BnaC07g00340D
BnaA04g04580D	BnaA06g31690D		BnaA05g18780D
BnaA04g26090D	BnaA06g35190D		BnaA05g27760D
BnaA06g08580D	BnaA07g20340D		BnaA06g05350D
BnaC06g12550D	BnaA07g25130D		BnaA07g34710D
BnaA06g01020D	BnaA09g33870D		BnaA07g35410D
BnaC01g34290D	BnaA10g00780D		BnaA08g08690D
BnaC05g43010D	BnaC01g26120D		BnaA08g15480D
BnaC06g40450D	BnaC01g37580D		BnaC03g00500D
BnaA05g00920D	BnaC02g42970D		BnaC03g23430D
BnaC01g32860D	BnaC03g15520D		BnaC04g20100D
BnaC02g42180D	BnaC03g33210D		BnaC04g50230D
BnaA04g01480D	BnaC03g34420D		BnaC05g13760D
BnaA01g10270D	BnaC04g38600D		BnaC06g12300D
BnaA01g14470D	BnaC05g15280D		BnaC07g11070D
BnaA02g18390D	BnaC05g28890D		BnaC07g34910D
BnaA03g02250D	BnaC05g28920D		BnaC09g01020D
BnaA04g27190D	BnaC07g13270D		BnaA01g16870D
BnaA06g28030D	BnaC07g34690D		BnaA02g16890D
BnaA10g01070D	BnaC08g15360D		BnaA02g33070D
BnaC03g37540D	BnaC08g16340D		BnaA06g20400D
BnaC03g51940D	BnaC08g27340D		BnaA09g06830D
BnaC07g36070D	BnaC08g36630D		BnaA09g08870D
BnaC09g09260D	BnaA02g04820D		BnaA10g18110D
BnaA03g33670D	BnaA02g14850D		BnaC01g06920D
BnaA08g22890D	BnaA03g23830D		BnaC01g24020D
BnaA10g09310D	BnaA03g28850D		BnaC01g27810D
BnaA01g13700D	BnaA04g19840D		BnaC02g09160D
BnaA01g22910D	BnaA04g24000D		BnaC02g12710D
BnaA07g28380D	BnaA04g24700D		BnaC02g18070D
BnaC01g37490D	BnaA05g31860D		BnaC02g22680D
BnaC05g34900D	BnaA06g28180D		BnaC02g25900D
BnaC07g38310D	BnaA06g28910D		BnaC04g18590D
BnaA05g14640D	BnaA07g14420D		BnaC04g44240D
BnaA05g28570D	BnaA07g16210D		BnaC05g09850D
BnaA05g32460D	BnaA07g32360D		BnaC06g30770D
BnaC01g23550D	BnaA08g15890D		BnaC07g27680D
BnaC07g01780D	BnaA09g14000D		BnaC07g36250D
BnaC08g38280D	BnaA10g01530D		BnaC08g14110D
BnaC09g35780D	BnaC01g08470D		BnaC08g19410D
BnaA01g29980D	BnaC02g05990D		BnaC09g14050D
BnaA01g32410D	BnaC03g26070D		BnaC09g21920D
BnaA07g14760D	BnaC03g26570D		BnaC09g34700D
BnaA10g02200D	BnaC03g27590D		BnaC09g44020D
BnaC03g57810D	BnaC03g42170D		BnaA03g09800D
BnaA02g23720D	BnaC03g60860D		BnaA03g20830D
BnaA10g21400D	BnaC04g06670D		BnaA03g28020D
BnaC01g11650D	BnaC04g29530D		BnaA03g30240D
BnaC07g09110D	BnaC04g45100D		BnaA05g21230D
BnaC07g32590D	BnaC05g45170D		BnaA06g33290D
BnaC08g32850D	BnaC06g24700D		BnaA09g50540D
BnaA01g10930D	BnaC07g11800D		BnaA10g08050D
BnaC03g68210D	BnaC07g25690D		BnaA10g25950D
BnaA03g23000D	BnaC07g41660D		BnaC02g04020D
BnaA05g29270D	BnaC08g05610D		BnaC03g00560D
BnaA05g33350D	BnaC08g42690D		BnaC03g38290D
BnaA07g30740D	BnaC09g02040D		BnaC03g44550D
BnaA09g04590D	BnaC09g26430D		BnaC05g19320D
BnaC04g49960D	BnaA01g03620D		BnaC05g26210D
BnaC05g06150D	BnaA01g23200D		BnaC07g12890D
BnaC08g26600D	BnaA01g31380D		BnaC07g13570D
BnaC08g46130D	BnaA02g25400D		BnaC07g26210D
BnaA02g10880D	BnaA03g34800D		BnaC08g26600D
BnaA03g03880D	BnaA03g44500D		BnaC09g01340D
BnaA03g48580D	BnaA04g26420D		BnaC09g06610D
BnaA04g00840D	BnaA05g00500D		BnaC09g15600D
BnaA05g23570D	BnaA05g07930D		BnaC09g35030D
BnaC02g05020D	BnaA05g29010D		BnaA01g09520D
BnaC03g12570D	BnaA06g08900D		BnaA02g01670D
BnaC04g10630D	BnaA06g08930D		BnaA06g36550D
BnaC05g05080D	BnaA06g23070D		BnaA10g18610D
BnaC05g46530D	BnaA06g28850D		BnaC02g02220D
BnaC06g35230D	BnaA07g23520D		BnaC02g43290D
BnaC07g12450D	BnaA07g29210D		BnaC03g34960D
BnaA06g13140D	BnaA08g26470D		BnaC05g05260D
BnaA09g15220D	BnaA09g02680D		BnaC05g41660D
BnaC08g25170D	BnaA09g07030D		BnaC06g11830D
BnaC08g43960D	BnaA09g39090D		BnaC06g19950D
BnaA01g12810D	BnaA09g42070D		BnaC06g36550D
BnaA01g15250D	BnaA10g14810D		BnaC06g39580D
BnaA01g30290D	BnaC02g17080D		BnaC06g40210D
BnaA02g22990D	BnaC03g02850D		BnaC07g15720D
BnaA02g25200D	BnaC03g35310D		BnaC08g42320D
BnaA02g31950D	BnaC03g38540D		BnaC09g14660D
BnaA04g26270D	BnaC03g45800D		BnaA01g26650D
BnaA05g18920D	BnaC03g50490D		BnaA02g21130D
BnaA06g16230D	BnaC03g68360D		BnaA05g30970D
BnaA06g21310D	BnaC04g05740D		BnaA06g17240D
BnaA07g08050D	BnaC04g31240D		BnaA07g09220D
BnaA07g09370D	BnaC04g46560D		BnaA10g00240D
BnaA07g10720D	BnaC05g09400D		BnaC01g01150D
BnaA08g15380D	BnaC05g10210D		BnaC01g22800D
BnaA08g25870D	BnaC05g11700D		BnaC02g11060D
BnaA09g03230D	BnaC05g39020D		BnaC02g17580D
BnaA09g06710D	BnaC06g19000D		BnaC02g23280D
BnaA10g09420D	BnaC06g38070D		BnaC02g39310D
BnaC02g14180D	BnaC07g36640D		BnaC03g26500D
BnaC02g32470D	BnaC07g40490D		BnaC04g01510D
BnaC03g04230D	BnaC08g27950D		BnaC04g17640D
BnaC03g09550D	BnaC09g09640D		BnaC04g28930D
BnaC03g44190D	BnaC09g15120D		BnaC05g13230D
BnaC03g45500D	BnaA01g10750D		BnaC05g30480D
BnaC04g19270D	BnaA01g14450D		BnaC06g38430D
BnaC04g23060D	BnaA01g29790D		BnaC07g45740D
BnaC05g42850D	BnaA02g03040D		BnaC08g29390D
BnaC05g48650D	BnaA02g19000D		BnaC09g43580D
BnaC07g08620D	BnaA03g11490D		BnaC09g46430D
BnaC08g10400D	BnaA03g30660D		BnaA04g19370D
BnaC08g33110D	BnaA04g10890D		BnaA05g14610D
BnaC08g44140D	BnaA04g17090D		BnaA07g32670D
BnaA01g17060D	BnaA04g18980D		BnaA08g19620D
BnaA06g07240D	BnaA05g33610D		BnaA09g40050D
BnaA06g10020D	BnaA08g00300D		BnaC01g03320D
BnaA06g30390D	BnaA08g16540D		BnaC01g30310D
BnaA08g15590D	BnaC01g15130D		BnaC02g05000D
BnaA09g50960D	BnaC02g00740D		BnaC03g17450D
BnaC02g27270D	BnaC02g02700D		BnaC03g60050D
BnaC05g04720D	BnaC02g24370D		BnaC04g15710D
BnaC07g01920D	BnaC03g28620D		BnaC04g16830D
BnaC07g23590D	BnaC03g58140D		BnaC04g48190D
BnaC07g24170D	BnaC04g05850D		BnaC06g21740D
BnaC08g09690D	BnaC04g48830D		BnaC06g34930D
BnaC08g26630D	BnaC05g17850D		BnaC07g11160D
BnaA03g04250D	BnaC05g21270D		BnaC08g23150D
BnaA03g16290D	BnaC06g36600D		BnaC08g45480D
BnaA03g43410D	BnaC07g12590D		BnaC09g18620D
BnaA07g05710D	BnaC08g36790D		BnaC09g22600D
BnaA09g12090D	BnaC09g07650D		BnaC09g44720D
BnaA09g49310D	BnaA01g13500D		BnaA02g09070D
BnaA10g22140D	BnaA01g20230D		BnaA02g15960D
BnaC02g08590D	BnaA01g28070D		BnaA04g00260D
BnaC03g57000D	BnaA01g34430D		BnaA09g03390D
BnaC06g32510D	BnaA02g07170D		BnaA09g24250D
BnaC07g12370D	BnaA03g04990D		BnaA09g49420D
BnaC07g32790D	BnaA03g06530D		BnaC03g21550D
BnaC08g24320D	BnaA03g08390D		BnaC03g37770D
BnaA01g13270D	BnaA03g33220D		BnaC04g06290D
BnaA03g53310D	BnaA03g39100D		BnaC04g20690D
BnaA04g16260D	BnaA03g40550D		BnaC05g13270D
BnaA04g17170D	BnaA04g08720D		BnaC05g14580D
BnaA05g16830D	BnaA05g22480D		BnaC06g06940D
BnaA05g18730D	BnaA06g35610D		BnaC06g19890D
BnaA09g03310D	BnaA07g30340D		BnaC07g25110D
BnaA10g23640D	BnaA08g09100D		BnaC08g28620D
BnaC03g31800D	BnaA08g13480D		BnaC09g24230D
BnaC04g35760D	BnaA08g24370D		BnaA04g16860D
BnaC04g35990D	BnaA09g03630D		BnaA05g05930D
BnaC05g13820D	BnaC01g21820D		BnaA05g15140D
BnaC05g42190D	BnaC02g18440D		BnaA06g06150D
BnaC06g36740D	BnaC02g23150D		BnaA06g31290D
BnaC07g20180D	BnaC02g27490D		BnaA07g07480D
BnaC07g44300D	BnaC03g03050D		BnaA08g14250D
BnaC09g11730D	BnaC03g26280D		BnaA09g31100D
BnaA01g16400D	BnaC03g55510D		BnaA10g06260D
BnaA02g11550D	BnaC04g33150D		BnaC01g03080D
BnaA02g27150D	BnaC04g47960D		BnaC02g00040D
BnaA03g16340D	BnaC04g48550D		BnaC02g24000D
BnaA03g42100D	BnaC05g08190D		BnaC03g01900D
BnaA05g26890D	BnaC05g08640D		BnaC03g34210D
BnaA06g30170D	BnaC05g12190D		BnaC04g45970D
BnaA07g03170D	BnaC06g01500D		BnaC06g38970D
BnaA07g17250D	BnaC06g30340D		BnaC07g16090D
BnaA08g01570D	BnaC08g08080D		BnaC07g27700D
BnaC06g24620D	BnaC08g26510D		BnaC08g41610D
BnaC07g41750D	BnaA01g09240D		BnaC09g27750D
BnaC08g30620D	BnaA01g19230D		BnaC09g44180D
BnaC09g44570D	BnaA03g39590D		BnaA03g25890D
BnaA06g24930D	BnaA05g17430D		BnaA03g53320D
BnaA07g05790D	BnaA05g25770D		BnaA05g11880D
BnaA08g10790D	BnaA06g24320D		BnaA05g22270D
BnaA08g21560D	BnaA06g34240D		BnaA09g04620D
BnaC01g14640D	BnaA07g18310D		BnaA10g07880D
BnaC02g05830D	BnaA07g19520D		BnaA10g11240D
BnaC02g18180D	BnaA08g18750D		BnaC01g15540D
BnaC03g16580D	BnaA08g26410D		BnaC01g38710D
BnaC03g46570D	BnaA09g14030D		BnaC03g52240D
BnaC03g53780D	BnaA09g34460D		BnaC03g54610D
BnaC04g07040D	BnaA10g14710D		BnaC04g05500D
BnaC05g36190D	BnaC01g08350D		BnaC05g12810D
BnaA03g08380D	BnaC01g09500D		BnaC05g13310D
BnaA03g36870D	BnaC02g00150D		BnaC05g18030D
BnaA07g00540D	BnaC02g27560D		BnaC06g11150D
BnaA07g33400D	BnaC03g33820D		BnaC06g37830D
BnaA09g10550D	BnaC03g37090D		BnaC07g16780D
BnaA09g36670D	BnaC03g44640D		BnaC07g30630D
BnaC02g03550D	BnaC04g02520D		BnaC09g20950D
BnaC02g26480D	BnaC04g45620D		BnaC09g43310D
BnaC03g18580D	BnaC05g26760D		BnaA01g05960D
BnaC03g22390D	BnaC05g38510D		BnaA02g25550D
BnaC05g05020D	BnaC05g46750D		BnaA03g22400D
BnaC05g45360D	BnaC05g47740D		BnaA05g20690D
BnaC07g32860D	BnaC06g40330D		BnaA07g10200D
BnaC07g33030D	BnaC09g46870D		BnaC01g12070D
BnaC08g14730D	BnaA01g23600D		BnaC01g30540D
BnaC08g21940D	BnaA01g30370D		BnaC01g36280D
BnaC08g44810D	BnaA02g17280D		BnaC03g37120D
BnaC09g12260D	BnaA03g06360D		BnaC05g44690D
BnaC09g21890D	BnaA04g16470D		BnaC06g15570D
BnaC09g25530D	BnaA04g18800D		BnaC07g22430D
BnaC09g26150D	BnaA06g06990D		BnaC08g13720D
BnaA02g00610D	BnaA06g14920D		BnaC08g18270D
BnaA02g19970D	BnaA06g24640D		BnaC08g34610D
BnaA03g37160D	BnaA08g24920D		BnaC09g14730D
BnaA03g47030D	BnaA09g06900D		BnaA01g19160D
BnaA05g17490D	BnaA09g13230D		BnaA03g08070D
BnaA05g24560D	BnaA09g32370D		BnaA03g18840D
BnaA06g35290D	BnaA10g10000D		BnaA03g51630D
BnaA07g27080D	BnaA10g19460D		BnaA04g22380D
BnaA09g10830D	BnaC01g01650D		BnaA05g07580D
BnaA09g45310D	BnaC01g14160D		BnaA05g27750D
BnaC01g22380D	BnaC01g16290D		BnaA06g02150D
BnaC03g38260D	BnaC03g01550D		BnaA06g28590D
BnaC03g68400D	BnaC03g26430D		BnaA06g31800D
BnaC04g05630D	BnaC03g51980D		BnaA07g03650D
BnaC05g02990D	BnaC03g63110D		BnaC01g18700D
BnaC05g22850D	BnaC05g11140D		BnaC03g31540D
BnaC06g28680D	BnaC06g13870D		BnaC04g30980D
BnaC07g05840D	BnaC06g32550D		BnaC05g15200D
BnaC07g31950D	BnaC07g31260D		BnaA01g14910D
BnaC08g25590D	BnaC07g36730D		BnaA03g50900D
BnaC08g35290D	BnaC07g38200D		BnaA06g09220D
BnaC09g06740D	BnaC08g35800D		BnaA06g35650D
BnaC09g48810D	BnaC08g42870D		BnaA07g19670D
BnaA01g16050D	BnaC09g29640D		BnaA08g15150D
BnaA01g26220D	BnaC09g37380D		BnaA08g24210D
BnaA03g03740D	BnaA01g07560D		BnaA09g21710D
BnaA03g11190D	BnaA03g02580D		BnaA09g32490D
BnaA03g14620D	BnaA03g50840D		BnaA09g38870D
BnaA03g25920D	BnaA05g06970D		BnaC01g00940D
BnaA06g28160D	BnaA05g17440D		BnaC03g19100D
BnaA09g03880D	BnaA06g07520D		BnaC03g65740D
BnaC01g23010D	BnaA06g17280D		BnaC05g00380D
BnaC01g30540D	BnaA06g18130D		BnaC07g36680D
BnaC02g02460D	BnaA07g29350D		BnaC09g12000D
BnaC03g21690D	BnaA08g16560D		BnaA01g02620D
BnaC06g24020D	BnaA08g22780D		BnaA02g14880D
BnaC09g08240D	BnaA09g01660D		BnaA03g46900D
BnaA01g01560D	BnaA09g31010D		BnaA05g01820D
BnaA01g15510D	BnaA10g04470D		BnaA06g02970D
BnaA02g14830D	BnaA10g24260D		BnaA06g09960D
BnaA03g17470D	BnaC01g28600D		BnaA06g36020D
BnaA04g01900D	BnaC02g05080D		BnaA09g14920D
BnaA05g03040D	BnaC03g10160D		BnaA10g08620D
BnaA06g09790D	BnaC03g10380D		BnaC03g42840D
BnaA08g24640D	BnaC03g65910D		BnaC06g11890D
BnaC02g03840D	BnaC04g11720D		BnaC06g25460D
BnaC02g18030D	BnaC04g14970D		BnaC07g23380D
BnaC02g33320D	BnaC04g40170D		BnaC08g32660D
BnaC03g62800D	BnaC04g50940D		BnaC09g33600D
BnaC04g22420D	BnaC05g13340D		BnaA01g33090D
BnaC05g29600D	BnaC05g30740D		BnaA02g25150D
BnaC07g36920D	BnaC05g38890D		BnaA05g15440D
BnaA01g14480D	BnaC05g40180D		BnaA05g23680D
BnaA02g34220D	BnaC06g35340D		BnaA05g28020D
BnaA04g19000D	BnaC08g01240D		BnaA06g04460D
BnaA04g26360D	BnaC08g15160D		BnaA06g13600D
BnaA05g18840D	BnaC08g42850D		BnaA06g25880D
BnaA05g28000D	BnaA01g00660D		BnaA07g23630D
BnaA06g15580D	BnaA02g09970D		BnaA08g15700D
BnaA06g33730D	BnaA02g17550D		BnaA08g27570D
BnaA08g18240D	BnaA03g00970D		BnaA09g49830D
BnaC01g37930D	BnaA03g50290D		BnaC03g07880D
BnaC03g13580D	BnaA03g53010D		BnaC04g48410D
BnaC03g27360D	BnaA04g14250D		BnaC08g23340D
BnaC03g30260D	BnaA05g01210D		BnaC09g32510D
BnaC03g36350D	BnaA06g24290D		BnaC09g50390D
BnaC04g14490D	BnaA06g30080D		BnaA01g18100D
BnaC05g00680D	BnaA06g31190D		BnaA07g01200D
BnaC05g00700D	BnaA07g00980D		BnaA08g15260D
BnaC05g20650D	BnaA07g18630D		BnaA09g08500D
BnaC06g05930D	BnaA07g29240D		BnaA09g46300D
BnaC07g37940D	BnaA07g29250D		BnaA10g23930D
BnaC08g25510D	BnaA08g23390D		BnaC01g26700D
BnaC09g33300D	BnaA10g03540D		BnaC03g09760D
BnaA01g30170D	BnaA10g03630D		BnaC04g12740D
BnaA01g32140D	BnaA10g16110D		BnaC05g00270D
BnaA03g10450D	BnaA10g26840D		BnaC05g22070D
BnaA05g29400D	BnaC03g07310D		BnaC06g11850D
BnaA07g13390D	BnaC03g21130D		BnaC07g43880D
BnaA08g02390D	BnaC03g38130D		BnaC08g10470D
BnaA09g44710D	BnaC04g29100D		BnaC08g40410D
BnaC01g17940D	BnaC05g44330D		BnaA03g06110D
BnaC02g17930D	BnaC06g32880D		BnaA03g13890D
BnaC02g36310D	BnaC06g37640D		BnaA06g24930D
BnaC02g43800D	BnaC07g20630D		BnaA06g35280D
BnaC03g11250D	BnaC07g25120D		BnaA09g10200D
BnaC03g33350D	BnaC08g39100D		BnaA09g44370D
BnaC03g46390D	BnaC09g12800D		BnaA10g17830D
BnaC03g53430D	BnaC09g30770D		BnaC03g20080D
BnaC04g15250D	BnaC09g47490D		BnaC03g38360D
BnaC04g49100D	BnaA01g08890D		BnaC04g24230D
BnaC08g25790D	BnaA01g13850D		BnaC04g29370D
BnaC08g36140D	BnaA01g19750D		BnaC05g44110D
BnaC08g38640D	BnaA03g21830D		BnaC07g38950D
BnaA01g02900D	BnaA03g37150D		BnaC07g39980D
BnaA01g24360D	BnaA03g44610D		BnaA01g16530D
BnaA01g32070D	BnaA03g45050D		BnaA04g13650D
BnaA02g01150D	BnaA05g17500D		BnaA05g18950D
BnaA03g02460D	BnaA05g23740D		BnaA07g04890D
BnaA03g35110D	BnaA06g10080D		BnaA09g22870D
BnaA04g13910D	BnaA06g14500D		BnaA09g35670D
BnaA06g16660D	BnaA07g12410D		BnaA10g00630D
BnaA10g23110D	BnaA07g34120D		BnaC01g10400D
BnaC01g06500D	BnaA08g27450D		BnaC01g17920D
BnaC01g15860D	BnaA09g27960D		BnaC01g39520D
BnaC03g05870D	BnaA09g35620D		BnaC02g20160D
BnaC03g21220D	BnaA09g48200D		BnaC03g42410D
BnaC03g59850D	BnaA10g20470D		BnaC04g21910D
BnaC04g21210D	BnaC01g10790D		BnaC04g22770D
BnaC04g32860D	BnaC01g12560D		BnaC04g48980D
BnaC06g12210D	BnaC03g11060D		BnaC06g40080D
BnaC07g11590D	BnaC03g34300D		BnaC07g03930D
BnaC07g14120D	BnaC04g11950D		BnaC07g23990D
BnaC07g33170D	BnaC04g28780D		BnaC08g08800D
BnaC07g39920D	BnaC05g01340D		BnaA01g31500D
BnaC07g45610D	BnaC05g08240D		BnaA02g16050D
BnaC08g11930D	BnaC05g32310D		BnaA03g01910D
BnaC08g19580D	BnaC06g20290D		BnaA04g09660D
BnaC08g36870D	BnaC06g32350D		BnaA08g15140D
BnaC08g45770D	BnaC07g11170D		BnaA09g40130D
BnaC09g05760D	BnaC08g29060D		BnaC01g26140D
BnaA01g06910D	BnaA01g02090D		BnaC01g28790D
BnaA01g33040D	BnaA02g04920D		BnaC02g23100D
BnaA02g08440D	BnaA02g05230D		BnaC02g37490D
BnaA04g10520D	BnaA02g05430D		BnaC04g16820D
BnaA04g16030D	BnaA03g22310D		BnaC04g38220D
BnaA04g26070D	BnaA03g24100D		BnaC06g24020D
BnaA06g11790D	BnaA04g17710D		BnaC08g03180D
BnaA06g16290D	BnaA05g08220D		BnaC08g17720D
BnaA08g12040D	BnaA05g14880D		BnaA01g09260D
BnaA09g06520D	BnaA06g30770D		BnaA01g16030D
BnaA09g44350D	BnaA06g33520D		BnaA03g51990D
BnaA10g19530D	BnaA09g00540D		BnaA04g16720D
BnaC01g25030D	BnaA10g16080D		BnaA09g16630D
BnaC02g03540D	BnaA10g21960D		BnaA09g20550D
BnaC03g16040D	BnaC01g15120D		BnaC05g04730D
BnaC03g30510D	BnaC02g27240D		BnaC05g16170D
BnaC03g40470D	BnaC03g09490D		BnaC05g43410D
BnaC03g51120D	BnaC03g18980D		BnaC06g03580D
BnaC03g66230D	BnaC03g20760D		BnaC09g37710D
BnaC04g04110D	BnaC03g37860D		BnaC09g40400D
BnaC04g09800D	BnaC03g38400D		BnaA04g06700D
BnaC04g17300D	BnaC03g50340D		BnaA04g11150D
BnaC05g28640D	BnaC04g38560D		BnaA05g07920D
BnaC05g42940D	BnaC05g37160D		BnaA05g25720D
BnaC05g46000D	BnaC06g19650D		BnaA07g10310D
BnaC05g48360D	BnaC06g39970D		BnaA09g08960D
BnaC06g25220D	BnaC07g36330D		BnaA09g19580D
BnaC07g23740D	BnaC08g00090D		BnaA10g22150D
BnaC08g37410D	BnaC08g13830D		BnaC01g33540D
BnaA03g18600D	BnaC08g27160D		BnaC03g47120D
BnaA06g11310D	BnaC09g31420D		BnaC05g14530D
BnaA07g10410D	BnaC09g36680D		BnaC07g20420D
BnaA07g12730D	BnaC09g42920D		BnaC08g15870D
BnaA07g22810D	BnaA01g32290D		BnaA02g03560D
BnaA08g08000D	BnaA02g07790D		BnaA06g05620D
BnaA08g19570D	BnaA03g45670D		BnaA06g31280D
BnaA09g17310D	BnaA04g00460D		BnaA09g10000D
BnaA09g29200D	BnaA04g01810D		BnaA09g46380D
BnaC01g14240D	BnaA04g13100D		BnaA10g10350D
BnaC01g37190D	BnaA05g01150D		BnaC01g17580D
BnaC02g15450D	BnaA06g02520D		BnaC01g20530D
BnaC03g44230D	BnaA06g36410D		BnaC03g48070D
BnaC04g20740D	BnaA07g08170D		BnaC08g01740D
BnaC05g14600D	BnaA07g26650D		BnaA02g00370D
BnaC06g06680D	BnaA08g00740D		BnaA04g13100D
BnaC07g40870D	BnaA08g20360D		BnaA04g20750D
BnaC09g10970D	BnaA08g22550D		BnaA06g10130D
BnaC09g11430D	BnaA08g23150D		BnaA08g21160D
BnaA01g12190D	BnaA09g11700D		BnaA08g23200D
BnaA02g14360D	BnaA09g29070D		BnaA10g10110D
BnaA03g03180D	BnaA10g06340D		BnaC01g08190D
BnaA03g37900D	BnaA10g25410D		BnaC03g00950D
BnaA04g19740D	BnaC02g37200D		BnaC03g12290D
BnaA06g27990D	BnaC03g10580D		BnaC03g35890D
BnaA08g22220D	BnaC03g20650D		BnaC06g02240D
BnaA09g10340D	BnaC03g31740D		BnaC06g06700D
BnaA09g10920D	BnaC03g56240D		BnaC09g18740D
BnaA10g19570D	BnaC04g19510D		BnaC09g44000D
BnaC01g18080D	BnaC05g08120D		BnaA02g05410D
BnaC01g18790D	BnaC05g47800D		BnaA05g27910D
BnaC01g37900D	BnaC06g20900D		BnaA06g10920D
BnaC05g13270D	BnaC07g00480D		BnaA08g00460D
BnaC05g45780D	BnaC07g20570D		BnaA09g06090D
BnaC06g27350D	BnaC07g29640D		BnaA09g38950D
BnaC07g20710D	BnaC08g18940D		BnaA09g44830D
BnaC07g31780D	BnaC08g26020D		BnaA10g19180D
BnaC08g24190D	BnaC09g30600D		BnaC01g09830D
BnaC09g17380D	BnaA01g00380D		BnaC05g17270D
BnaC09g20430D	BnaA01g11420D		BnaC08g27580D
BnaA01g14680D	BnaA02g32110D		BnaC09g45130D
BnaA03g31430D	BnaA03g23260D
BnaA03g34250D	BnaA03g46400D
BnaA05g05840D	BnaA04g25590D
BnaA05g11350D	BnaA06g03110D
BnaA05g28360D	BnaA06g31310D
BnaA06g22830D	BnaA06g31460D
BnaA07g12320D	BnaA07g16370D
BnaA08g21480D	BnaA09g32660D
BnaA09g02320D	BnaC02g13880D
BnaA09g16350D	BnaC03g37370D
BnaC01g03430D	BnaC04g42170D
BnaC01g10800D	BnaC05g25880D
BnaC03g10600D	BnaC06g09050D
BnaC04g38570D	BnaC06g26750D
BnaC04g50530D	BnaA03g00890D
BnaC05g40790D	BnaA03g17100D
BnaC06g11250D	BnaA04g02430D
BnaC08g08130D	BnaA05g12690D
BnaC08g11410D	BnaA06g28290D
BnaC08g23880D	BnaA06g32700D
BnaC08g43430D	BnaA06g35240D
BnaC09g32080D	BnaA08g21050D
BnaA01g28830D	BnaA10g19430D
BnaA02g03140D	BnaA10g25840D
BnaA03g13520D	BnaC01g32970D
BnaA03g26400D	BnaC02g09760D
BnaA04g01640D	BnaC02g39970D
BnaA05g24770D	BnaC04g28360D
BnaA06g04270D	BnaC04g36150D
BnaA06g05540D	BnaC05g15880D
BnaA06g20450D	BnaC05g33340D
BnaA07g03800D	BnaC05g36080D
BnaA08g08350D	BnaC05g46840D
BnaA09g08290D	BnaC06g22970D
BnaA09g17010D	BnaC06g27960D
BnaC02g42910D	BnaC06g33790D
BnaC03g08840D	BnaC07g41690D
BnaC05g48610D	BnaC08g36420D
BnaC05g48740D	BnaC09g01740D
BnaC06g10570D	BnaC09g07430D
BnaC07g44840D	BnaC09g15790D
BnaC09g00630D	BnaC09g37040D
BnaC09g48290D	BnaC09g41200D
BnaA01g11510D	BnaC09g46680D
BnaA01g13780D	BnaA01g00680D
BnaA02g12340D	BnaA01g08010D
BnaA02g22490D	BnaA01g16700D
BnaA03g07980D	BnaA02g20470D
BnaA03g15600D	BnaA02g31440D
BnaA03g48110D	BnaA03g38930D
BnaA04g11890D	BnaA03g46430D
BnaA08g16370D	BnaA04g06620D
BnaA09g13520D	BnaA04g08990D
BnaA09g34010D	BnaA05g01890D
BnaA09g36440D	BnaA05g31750D
BnaA10g16530D	BnaA06g35250D
BnaC01g17140D	BnaA07g03020D
BnaC01g31210D	BnaA07g11190D
BnaC01g34850D	BnaA07g22230D
BnaC02g34340D	BnaA08g01710D
BnaC03g35220D	BnaA09g02780D
BnaC04g25550D	BnaA09g30480D
BnaC04g36630D	BnaC01g00120D
BnaC05g29000D	BnaC01g01460D
BnaC05g39140D	BnaC01g15720D
BnaC05g41330D	BnaC02g38250D
BnaC05g48250D	BnaC03g07350D
BnaC08g22500D	BnaC03g25050D
BnaC08g31410D	BnaC03g50150D
BnaC08g45190D	BnaC04g10710D
BnaC09g08740D	BnaC06g17100D
BnaC09g13100D	BnaC07g26640D
BnaC09g20050D	BnaC08g21610D
BnaA01g01030D	BnaC08g29300D
BnaA01g13820D	BnaC08g39370D
BnaA02g07760D	BnaC09g06730D
BnaA02g15280D	BnaC09g36570D
BnaA02g22240D	BnaA02g14310D
BnaA03g07230D	BnaA03g13290D
BnaA03g47290D	BnaA03g24710D
BnaA04g26180D	BnaA03g42900D
BnaA05g02840D	BnaA05g13660D
BnaA05g32000D	BnaA05g21260D
BnaA06g04580D	BnaA07g31160D
BnaA06g18290D	BnaA08g18120D
BnaA07g03060D	BnaA08g19470D
BnaA08g27500D	BnaA09g39590D
BnaA09g17270D	BnaA09g50380D
BnaA09g17280D	BnaA10g03430D
BnaA09g39470D	BnaA10g17810D
BnaA10g09900D	BnaC01g03630D
BnaA10g19140D	BnaC01g11610D
BnaC01g18610D	BnaC01g19110D
BnaC01g28200D	BnaC02g41690D
BnaC02g16370D	BnaC03g01500D
BnaC03g44080D	BnaC03g11620D
BnaC04g35430D	BnaC03g57070D
BnaC04g47910D	BnaC04g08400D
BnaC05g34080D	BnaC04g17750D
BnaC06g22100D	BnaC04g21370D
BnaC07g02460D	BnaC05g08730D
BnaC09g28670D	BnaC06g23230D
BnaC09g41620D	BnaC06g33640D
BnaA01g01900D	BnaC07g21100D
BnaA01g02590D	BnaC08g12400D
BnaA02g04340D	BnaC08g36780D
BnaA02g29380D	BnaC09g16150D
BnaA03g03650D	BnaA01g03040D
BnaA03g16860D	BnaA01g04270D
BnaA03g23100D	BnaA02g03860D
BnaA03g34350D	BnaA03g10570D
BnaA04g03650D	BnaA03g26800D
BnaA04g22350D	BnaA03g45290D
BnaA05g11250D	BnaA04g20610D
BnaA05g13760D	BnaA07g05610D
BnaA05g15140D	BnaA08g04550D
BnaA05g25710D	BnaA08g24570D
BnaA05g27190D	BnaA08g26640D
BnaA05g29900D	BnaA09g15400D
BnaA07g35610D	BnaC02g22640D
BnaA08g21770D	BnaC03g14470D
BnaA09g02070D	BnaC03g28650D
BnaA09g19980D	BnaC03g47500D
BnaA09g31540D	BnaC03g48440D
BnaA10g24800D	BnaC04g05350D
BnaC01g13870D	BnaC04g09540D
BnaC01g20200D	BnaC05g09250D
BnaC01g38040D	BnaC05g29300D
BnaC02g19940D	BnaC07g20260D
BnaC02g35100D	BnaC08g31740D
BnaC03g00540D	BnaA01g02150D
BnaC03g05240D	BnaA03g04850D
BnaC03g30590D	BnaA04g04060D
BnaC03g36840D	BnaA04g18320D
BnaC03g46310D	BnaA05g27470D
BnaC04g51400D	BnaA06g17360D
BnaC05g41180D	BnaA06g28070D
BnaC06g33940D	BnaA06g34400D
BnaC07g08550D	BnaA06g36460D
BnaC08g04690D	BnaA09g31120D
BnaC08g12270D	BnaC01g11030D
BnaC08g30870D	BnaC03g44340D
BnaC09g07480D	BnaC03g57040D
BnaC09g10990D	BnaC04g44410D
BnaA03g41710D	BnaC05g02660D
BnaA03g48280D	BnaC05g38410D
BnaA04g09750D	BnaC05g44130D
BnaA04g20380D	BnaC06g16750D
BnaA05g28370D	BnaC07g03080D
BnaA05g29470D	BnaC07g33940D
BnaA06g28560D	BnaC07g42990D
BnaA07g04570D	BnaA01g11060D
BnaA07g22650D	BnaA02g33270D
BnaA07g25600D	BnaA03g08760D
BnaA08g24400D	BnaA03g21100D
BnaA08g28230D	BnaA03g46440D
BnaA09g49010D	BnaA07g26590D
BnaA09g49660D	BnaA07g35320D
BnaA10g03440D	BnaA08g10300D
BnaC01g03910D	BnaA08g22200D
BnaC02g41700D	BnaA10g00300D
BnaC03g03470D	BnaA10g18150D
BnaC03g04140D	BnaC01g10940D
BnaC05g26130D	BnaC01g37360D
BnaC06g29880D	BnaC02g32900D
BnaC06g33890D	BnaC03g11070D
BnaC06g40070D	BnaC03g37720D
BnaC07g32320D	BnaC03g42890D
BnaC07g45050D	BnaC04g07660D
BnaC08g02120D	BnaC04g16730D
BnaC08g35880D	BnaC07g16310D
BnaC09g05560D	BnaC08g14490D
BnaC09g31060D	BnaC08g35600D
BnaC09g37310D	BnaC09g36750D
BnaC09g41410D	BnaA01g10340D
BnaC09g49250D	BnaA03g08110D
BnaA01g01880D	BnaA03g52180D
BnaA01g13800D	BnaA03g54160D
BnaA01g17050D	BnaA05g23140D
BnaA02g33510D	BnaA06g20390D
BnaA03g15950D	BnaA06g30310D
BnaA03g24640D	BnaA07g28820D
BnaA03g53850D	BnaA08g04220D
BnaA05g10520D	BnaA09g15460D
BnaA06g32010D	BnaC02g37040D
BnaA07g03790D	BnaC03g06140D
BnaA07g28980D	BnaC03g58940D
BnaA08g13300D	BnaC04g35470D
BnaA08g18250D	BnaC04g46320D
BnaA08g21360D	BnaC04g50860D
BnaA08g24280D	BnaC05g03270D
BnaA10g15350D	BnaC05g12130D
BnaC01g08150D	BnaC07g09310D
BnaC01g11970D	BnaA02g04200D
BnaC01g30550D	BnaA03g54220D
BnaC02g04830D	BnaA04g24930D
BnaC02g27570D	BnaA07g20070D
BnaC03g09350D	BnaA07g31920D
BnaC03g28860D	BnaA07g33020D
BnaC03g50710D	BnaA08g20250D
BnaC04g29830D	BnaA09g12400D
BnaC04g37620D	BnaA10g26720D
BnaC04g43990D	BnaC03g09700D
BnaC05g27080D	BnaC04g34470D
BnaC05g47860D	BnaC05g10050D
BnaC07g32480D	BnaC05g37490D
BnaC07g38900D	BnaC06g21420D
BnaC07g46030D	BnaC06g28350D
BnaC08g21730D	BnaC07g37320D
BnaC08g23130D	BnaC09g44790D
BnaC08g31130D	BnaA01g01340D
BnaC09g01310D	BnaA02g11520D
BnaC09g20710D	BnaA02g19780D
BnaC09g24670D	BnaA03g03020D
BnaC09g28090D	BnaA03g14600D
BnaC09g39120D	BnaA03g22030D
BnaC09g40450D	BnaA03g35370D
BnaC09g42500D	BnaA06g07260D
BnaA01g34380D	BnaA06g36890D
BnaA03g15040D	BnaA08g03820D
BnaA03g16790D	BnaA08g09730D
BnaA03g21240D	BnaA09g39830D
BnaA03g40290D	BnaC01g02530D
BnaA03g47140D	BnaC02g03120D
BnaA03g52080D	BnaC04g00080D
BnaA04g08950D	BnaC05g28200D
BnaA04g09840D	BnaC06g14180D
BnaA04g09860D	BnaC08g01700D
BnaA05g02400D	BnaC08g20810D
BnaA05g10140D	BnaC08g30770D
BnaA05g14520D	BnaC09g26200D
BnaA05g21580D	BnaA01g25880D
BnaA07g34250D	BnaA02g01870D
BnaA07g35890D	BnaA04g13830D
BnaA08g15510D	BnaA05g30570D
BnaA09g11940D	BnaA07g14280D
BnaA09g30080D	BnaA07g26090D
BnaA09g33880D	BnaA09g18460D
BnaA09g45360D	BnaA09g26090D
BnaA10g05680D	BnaA10g14470D
BnaC01g12790D	BnaC01g15460D
BnaC01g21380D	BnaC03g12480D
BnaC02g06220D	BnaC03g34760D
BnaC02g14060D	BnaC03g42800D
BnaC02g41000D	BnaC04g24040D
BnaC03g12830D	BnaC04g28040D
BnaC03g23510D	BnaC04g30990D
BnaC03g49800D	BnaC07g33350D
BnaC03g57830D	BnaC07g33630D
BnaC03g69900D	BnaC08g19010D
BnaC03g70270D	BnaC08g45900D
BnaC03g70910D	BnaA01g14330D
BnaC04g06960D	BnaA03g45200D
BnaC04g12610D	BnaA06g02010D
BnaC04g13870D	BnaA07g30610D
BnaC06g05370D	BnaA08g28830D
BnaC06g07640D	BnaA09g04650D
BnaC06g09960D	BnaA09g39020D
BnaC07g07590D	BnaC03g01350D
BnaC07g12650D	BnaC04g03680D
BnaC07g46760D	BnaC04g26730D
BnaC08g12100D	BnaC06g35920D
BnaC08g15400D	BnaC07g33780D
BnaC08g26990D	BnaC07g39690D
[truncated: 2,312 more rows]
