# Supplementary material for: Unravelling the Complex Interplay of Transcription Factors Orchestrating Seed Oil Content in Brassica napus L
Source: Int J Mol Sci. 2021 Jan 21;22(3):1033. doi: 10.3390/ijms22031033 (PMC7864344; doi:10.3390/ijms22031033)
Supplement: Supplementary file 1 [file ijms-22-01033-s001.zip › TableS2_Gene Ontology terms for MEG sets_Brassica napus.xlsx]

## Sheet: Sheet1
Gene ontology terms obtained for ascending MEGs of ZS11 cultivar
term_ID	description	freqInDbPercent	abslog10pvalue	uniqueness	dispensability	representative
1	GO:0006631	fatty acid metabolic process	0.878	3.8297	0.677	0	fatty acid metabolism
2	GO:0006541	glutamine metabolic process	0.472	0.7416	0.658	0.531	fatty acid metabolism
3	GO:0006308	DNA catabolic process	0.104	0.332	0.781	0.677	fatty acid metabolism
4	GO:0006543	glutamine catabolic process	0.01	0.7247	0.687	0.607	fatty acid metabolism
5	GO:0009767	photosynthetic electron transport chain	0.025	0.908	0.84	0.143	fatty acid metabolism
6	GO:0006520	cellular amino acid metabolic process	5.591	1.7235	0.622	0.581	fatty acid metabolism
7	GO:0008299	isoprenoid biosynthetic process	0.442	1	0.711	0.692	fatty acid metabolism
8	GO:0008033	tRNA processing	1.345	0.4893	0.775	0.679	fatty acid metabolism
9	GO:0006013	mannose metabolic process	0.031	0.4337	0.784	0.673	fatty acid metabolism
10	GO:0006564	L-serine biosynthetic process	0.075	1.7496	0.655	0.515	fatty acid metabolism
11	GO:0006014	D-ribose metabolic process	0.057	1.8761	0.777	0.263	fatty acid metabolism
12	GO:0051252	regulation of RNA metabolic process	10.029	0.4337	0.734	0.424	fatty acid metabolism
13	GO:0009250	glucan biosynthetic process	0.165	0.4337	0.706	0.637	fatty acid metabolism
14	GO:0006007	glucose catabolic process	0.029	0.7247	0.735	0.67	fatty acid metabolism
15	GO:0006012	galactose metabolic process	0.109	1.7282	0.766	0.667	fatty acid metabolism
16	GO:0006367	transcription initiation from RNA polymerase II promoter	0.109	0.4455	0.795	0.251	fatty acid metabolism
17	GO:0006591	ornithine metabolic process	0.088	0.9289	0.7	0.433	fatty acid metabolism
18	GO:0016075	rRNA catabolic process	0.059	0.4337	0.771	0.641	fatty acid metabolism
19	GO:0030163	protein catabolic process	0.997	0.7647	0.808	0.279	fatty acid metabolism
20	GO:0016567	protein ubiquitination	0.523	1.109	0.841	0.272	fatty acid metabolism
21	GO:0046417	chorismate metabolic process	0.24	1.0141	0.733	0.411	fatty acid metabolism
22	GO:0006098	pentose-phosphate shunt	0.287	1.3737	0.64	0.64	fatty acid metabolism
23	GO:0000105	histidine biosynthetic process	0.36	0.3089	0.626	0.615	fatty acid metabolism
24	GO:0006879	cellular iron ion homeostasis	0.11	1.0141	0.803	0.172	fatty acid metabolism
25	GO:0007050	cell cycle arrest	0.04	3.4962	0.82	0.149	fatty acid metabolism
26	GO:0006884	cell volume homeostasis	0.009	0.7247	0.791	0.534	fatty acid metabolism
27	GO:0022900	electron transport chain	0.564	0.5538	0.803	0.573	fatty acid metabolism
28	GO:0050821	protein stabilization	0.045	0.9289	0.941	0.45	fatty acid metabolism
29	GO:0055114	oxidation-reduction process	15.06	4.3107	0.811	0.237	fatty acid metabolism
30	GO:0009072	aromatic amino acid family metabolic process	0.719	2.2676	0.657	0.458	fatty acid metabolism
31	GO:0051301	cell division	1.23	0.5039	0.818	0.205	fatty acid metabolism
32	GO:0045901	positive regulation of translational elongation	0.013	0.3538	0.74	0.62	fatty acid metabolism
33	GO:0006412	translation	5.686	1.1141	0.64	0.696	fatty acid metabolism
34	GO:0009082	branched-chain amino acid biosynthetic process	0.402	0.9108	0.63	0.562	fatty acid metabolism
35	GO:0009088	threonine biosynthetic process	0.126	2.6968	0.649	0.496	fatty acid metabolism
36	GO:0007017	microtubule-based process	0.658	0.5965	0.827	0.192	fatty acid metabolism
37	GO:0006413	translational initiation	0.518	0.6444	0.706	0.534	fatty acid metabolism
38	GO:0006414	translational elongation	0.777	0.9527	0.697	0.456	fatty acid metabolism
39	GO:0006665	sphingolipid metabolic process	0.093	0.9586	0.746	0.6	fatty acid metabolism
40	GO:0009094	L-phenylalanine biosynthetic process	0.044	3.0921	0.658	0.355	fatty acid metabolism
41	GO:0046474	glycerophospholipid biosynthetic process	0.266	1.6676	0.687	0.659	fatty acid metabolism
42	GO:0008380	RNA splicing	0.413	0.908	0.806	0.209	fatty acid metabolism
43	GO:0006680	glucosylceramide catabolic process	0.004	0.4337	0.702	0.646	fatty acid metabolism
44	GO:0019439	aromatic compound catabolic process	1.164	0.6542	0.8	0.637	fatty acid metabolism
45	GO:0006452	translational frameshifting	0.017	0.3538	0.765	0.344	fatty acid metabolism
46	GO:0006446	regulation of translational initiation	0.091	1.8416	0.713	0.183	fatty acid metabolism
47	GO:0018342	protein prenylation	0.034	0.3538	0.872	0.357	fatty acid metabolism
48	GO:0006426	glycyl-tRNA aminoacylation	0.066	0.4337	0.642	0.378	fatty acid metabolism
49	GO:0006694	steroid biosynthetic process	0.122	0.7416	0.745	0.564	fatty acid metabolism
50	GO:0006432	phenylalanyl-tRNA aminoacylation	0.094	0.4337	0.634	0.624	fatty acid metabolism
51	GO:0006470	protein dephosphorylation	0.585	1.0737	0.805	0.455	fatty acid metabolism
52	GO:0031123	RNA 3'-end processing	0.145	0.3778	0.82	0.554	fatty acid metabolism
53	GO:0006231	dTMP biosynthetic process	0.048	1.2182	0.657	0.671	fatty acid metabolism
54	GO:0017009	protein-phycocyanobilin linkage	0.006	0.7247	0.884	0.314	fatty acid metabolism
55	GO:0006479	protein methylation	0.343	0.7275	0.85	0.432	fatty acid metabolism
56	GO:0032955	regulation of barrier septum assembly	0.025	0.7247	0.762	0.643	fatty acid metabolism
57	GO:0006730	one-carbon metabolic process	0.328	0.7169	0.76	0.307	fatty acid metabolism
58	GO:0005986	sucrose biosynthetic process	0.003	1.4522	0.784	0.407	fatty acid metabolism
59	GO:0009165	nucleotide biosynthetic process	2.562	1.3915	0.586	0.578	fatty acid metabolism
60	GO:0016485	protein processing	0.211	0.332	0.876	0.224	fatty acid metabolism
61	GO:0019370	leukotriene biosynthetic process	0.003	0.7247	0.738	0.473	fatty acid metabolism
62	GO:0017183	peptidyl-diphthamide biosynthetic process from peptidyl-histidine	0.024	0.5465	0.843	0.348	fatty acid metabolism
63	GO:0015969	guanosine tetraphosphate metabolic process	0.065	0.4043	0.695	0.421	fatty acid metabolism
64	GO:0031145	anaphase-promoting complex-dependent catabolic process	0.021	0.7247	0.823	0.589	fatty acid metabolism
65	GO:0006207	de novo' pyrimidine nucleobase biosynthetic process	0.192	2.1791	0.651	0.292	fatty acid metabolism
66	GO:0015977	carbon fixation	0.036	0.4765	0.875	0.124	fatty acid metabolism
67	GO:0007090	(obsolete) regulation of S phase of mitotic cell cycle	0.143	0.7247	0.989	0	(obsolete) regulation of S phase of mitotic cell cycle
68	GO:0008152	metabolic process	75.387	3.1561	0.997	0	metabolism
69	GO:0009405	pathogenesis	0.095	0.5465	0.989	0	pathogenesis
70	GO:0009987	cellular process	63.78	0.7469	0.996	0	cellular process
71	GO:0010038	response to metal ion	0.132	0.8614	0.944	0	response to metal ion
72	GO:0006302	double-strand break repair	0.211	0.5039	0.792	0.469	response to metal ion
73	GO:0006855	drug transmembrane transport	0.189	0.3609	0.812	0.523	response to metal ion
74	GO:0050832	defense response to fungus	0.028	0.5465	0.937	0.249	response to metal ion
75	GO:0071722	detoxification of arsenic-containing substance	0.003	0.3538	0.953	0.395	response to metal ion
76	GO:0007264	small GTPase mediated signal transduction	0.485	0.3012	0.831	0.503	response to metal ion
77	GO:0009611	response to wounding	0.127	0.4043	0.938	0.45	response to metal ion
78	GO:0009607	response to biotic stimulus	0.342	0.3724	0.945	0.421	response to metal ion
79	GO:0006950	response to stress	4.575	0.6064	0.935	0.38	response to metal ion
80	GO:0009966	regulation of signal transduction	0.857	0.439	0.824	0.471	response to metal ion
81	GO:0009408	response to heat	0.166	0.518	0.937	0.404	response to metal ion
82	GO:0000724	double-strand break repair via homologous recombination	0.12	0.3778	0.8	0.577	response to metal ion
83	GO:0009432	SOS response	0.29	0.312	0.892	0.604	response to metal ion
84	GO:0015675	nickel cation transport	0.023	2.3215	0.906	0	nickel cation transport
85	GO:0008535	respiratory chain complex IV assembly	0.03	0.5039	0.87	0.6	nickel cation transport
86	GO:0055085	transmembrane transport	8.916	1.6536	0.909	0.412	nickel cation transport
87	GO:0015031	protein transport	2.251	0.5499	0.891	0.624	nickel cation transport
88	GO:0042546	cell wall biogenesis	0.64	1.098	0.86	0.523	nickel cation transport
89	GO:0043461	proton-transporting ATP synthase complex assembly	0.014	0.7247	0.876	0.57	nickel cation transport
90	GO:0006820	anion transport	1.956	0.3334	0.895	0.57	nickel cation transport
91	GO:0006814	sodium ion transport	0.305	1.2757	0.897	0.567	nickel cation transport
92	GO:0016559	peroxisome fission	0.023	1.3335	0.889	0.433	nickel cation transport
93	GO:0006810	transport	17.616	0.634	0.904	0.684	nickel cation transport
94	GO:0071805	potassium ion transmembrane transport	0.331	0.9389	0.744	0.699	nickel cation transport
95	GO:0042255	ribosome assembly	0.164	1.4001	0.85	0.415	nickel cation transport
96	GO:0006824	cobalt ion transport	0.04	2.3215	0.901	0.697	nickel cation transport
97	GO:0048268	clathrin coat assembly	0.018	0.4594	0.874	0.579	nickel cation transport
98	GO:0051260	protein homooligomerization	0.106	0.5039	0.861	0.658	nickel cation transport
99	GO:0006857	oligopeptide transport	0.057	1.2255	0.919	0.346	nickel cation transport
100	GO:0006621	protein retention in ER lumen	0.017	0.4573	0.77	0.573	nickel cation transport
101	GO:0006415	translational termination	0.201	0.8791	0.639	0.579	nickel cation transport
102	GO:0045039	protein import into mitochondrial inner membrane	0.012	1.6478	0.747	0.164	nickel cation transport
103	GO:0016192	vesicle-mediated transport	1.085	0.3466	0.924	0.222	nickel cation transport
104	GO:0015671	oxygen transport	0.04	0.5039	0.869	0.321	nickel cation transport
105	GO:0046836	glycolipid transport	0.014	0.439	0.865	0.379	nickel cation transport
106	GO:0003333	amino acid transmembrane transport	0.475	0.8778	0.815	0.619	nickel cation transport
107	GO:0006913	nucleocytoplasmic transport	0.237	0.5735	0.917	0.543	nickel cation transport
108	GO:0032259	methylation	3.103	0.5366	0.97	0.017	methylation
109	GO:0009058	biosynthetic process	31.611	1.0325	0.966	0.03	biosynthesis
110	GO:0006556	S-adenosylmethionine biosynthetic process	0.05	1.5186	0.823	0.048	S-adenosylmethionine biosynthesis
111	GO:0006779	porphyrin-containing compound biosynthetic process	0.424	1.3107	0.722	0.534	S-adenosylmethionine biosynthesis
112	GO:0019295	coenzyme M biosynthetic process	0.001	0.9289	0.788	0.442	S-adenosylmethionine biosynthesis
113	GO:0009239	enterobactin biosynthetic process	0.006	1.0964	0.715	0.402	S-adenosylmethionine biosynthesis
114	GO:0046654	tetrahydrofolate biosynthetic process	0.101	0.596	0.634	0.565	S-adenosylmethionine biosynthesis
115	GO:0000103	sulfate assimilation	0.084	0.4966	0.909	0.536	S-adenosylmethionine biosynthesis
116	GO:0006069	ethanol oxidation	0.017	0.7247	0.809	0.515	S-adenosylmethionine biosynthesis
117	GO:0019419	sulfate reduction	0.041	0.5039	0.812	0.511	S-adenosylmethionine biosynthesis
118	GO:0016226	iron-sulfur cluster assembly	0.219	0.4738	0.735	0.602	S-adenosylmethionine biosynthesis
119	GO:0046274	lignin catabolic process	0.01	0.4594	0.778	0.694	S-adenosylmethionine biosynthesis
120	GO:0006072	glycerol-3-phosphate metabolic process	0.121	1.983	0.847	0.052	glycerol-3-phosphate metabolism
121	GO:0009298	GDP-mannose biosynthetic process	0.028	1.9431	0.805	0.347	glycerol-3-phosphate metabolism
122	GO:0070409	carbamoyl phosphate biosynthetic process	0	0.7247	0.857	0.267	glycerol-3-phosphate metabolism
123	GO:0006002	fructose 6-phosphate metabolic process	0.06	0.4765	0.86	0.37	glycerol-3-phosphate metabolism
124	GO:0006487	protein N-linked glycosylation	0.076	0.6747	0.738	0.415	glycerol-3-phosphate metabolism
125	GO:0006801	superoxide metabolic process	0.144	0.7169	0.929	0.053	superoxide metabolism
126	GO:0009790	embryo development	0.311	0.4043	0.918	0.078	embryo development
127	GO:0044237	cellular metabolic process	53.061	0.9559	0.923	0.078	cellular metabolism
128	GO:0006807	nitrogen compound metabolic process	38.744	0.7147	0.965	0.088	nitrogen compound metabolism
129	GO:0019538	protein metabolic process	18.489	0.3714	0.879	0.089	protein metabolism

## Sheet: Sheet2
Gene ontology terms obtained for descending MEGs of ZS11 cultivar
term_ID	description	freqInDbPercent	abslog10pvalue	uniqueness	dispensability	representative
1	GO:0006200	(obsolete) ATP catabolic process	0.143	1.6946	0.99	0	(obsolete) ATP catabolism
2	GO:0006468	protein phosphorylation	4.137	8.6308	0.756	0	protein phosphorylation
3	GO:0006306	DNA methylation	0.19	2.5784	0.785	0.54	protein phosphorylation
4	GO:0006796	phosphate-containing compound metabolic process	13.11	1.451	0.842	0.664	protein phosphorylation
5	GO:0006310	DNA recombination	1.641	1.1331	0.795	0.688	protein phosphorylation
6	GO:0006270	DNA replication initiation	0.141	2.3458	0.81	0.525	protein phosphorylation
7	GO:0006281	DNA repair	2.234	4.7423	0.753	0.201	protein phosphorylation
8	GO:0044237	cellular metabolic process	53.061	0.3035	0.919	0.176	protein phosphorylation
9	GO:0006855	drug transmembrane transport	0.189	0.9602	0.813	0.367	protein phosphorylation
10	GO:0009073	aromatic amino acid family biosynthetic process	0.54	0.808	0.638	0.638	protein phosphorylation
11	GO:0006887	exocytosis	0.21	0.4299	0.763	0.434	protein phosphorylation
12	GO:0009082	branched-chain amino acid biosynthetic process	0.402	0.8545	0.649	0.603	protein phosphorylation
13	GO:0009089	lysine biosynthetic process via diaminopimelate	0.288	1.2083	0.645	0.536	protein phosphorylation
14	GO:0001522	pseudouridine synthesis	0.35	0.5272	0.803	0.474	protein phosphorylation
15	GO:0006139	nucleobase-containing compound metabolic process	26.547	1.567	0.799	0.334	protein phosphorylation
16	GO:0008643	carbohydrate transport	0.682	0.3601	0.828	0.484	protein phosphorylation
17	GO:0008652	cellular amino acid biosynthetic process	2.932	0.6164	0.598	0.697	protein phosphorylation
18	GO:0009616	virus induced gene silencing	0.001	1.1772	0.906	0.389	protein phosphorylation
19	GO:0006725	cellular aromatic compound metabolic process	29.628	0.4343	0.885	0.135	protein phosphorylation
20	GO:0007205	protein kinase C-activating G-protein coupled receptor signaling pathway	0.018	1.7258	0.87	0.342	protein phosphorylation
21	GO:0006260	DNA replication	1.577	3.15	0.77	0.684	protein phosphorylation
22	GO:0043043	peptide biosynthetic process	5.77	0.8289	0.721	0.511	protein phosphorylation
23	GO:0006750	glutathione biosynthetic process	0.051	0.8309	0.799	0.356	protein phosphorylation
24	GO:0006754	ATP biosynthetic process	0.432	1.7595	0.636	0.57	protein phosphorylation
25	GO:0007186	G-protein coupled receptor signaling pathway	0.882	0.8897	0.83	0.604	protein phosphorylation
26	GO:0006221	pyrimidine nucleotide biosynthetic process	0.591	0.3243	0.645	0.675	protein phosphorylation
27	GO:0006541	glutamine metabolic process	0.472	0.4708	0.671	0.67	protein phosphorylation
28	GO:0006563	L-serine metabolic process	0.231	1.5622	0.683	0.401	protein phosphorylation
29	GO:0009725	response to hormone	0.335	0.6983	0.951	0.564	protein phosphorylation
30	GO:0006106	fumarate metabolic process	0.049	1.057	0.763	0.674	protein phosphorylation
31	GO:0000105	histidine biosynthetic process	0.36	1.1824	0.65	0.622	protein phosphorylation
32	GO:0006086	acetyl-CoA biosynthetic process from pyruvate	0.043	0.8289	0.705	0.567	protein phosphorylation
33	GO:0006397	mRNA processing	0.561	0.3117	0.825	0.269	protein phosphorylation
34	GO:0000160	phosphorelay signal transduction system	2.57	1.15	0.814	0.602	protein phosphorylation
35	GO:0006421	asparaginyl-tRNA aminoacylation	0.029	0.4708	0.678	0.569	protein phosphorylation
36	GO:0006436	tryptophanyl-tRNA aminoacylation	0.054	2.2048	0.665	0.312	protein phosphorylation
37	GO:0051103	DNA ligation involved in DNA repair	0.039	0.7757	0.818	0.628	protein phosphorylation
38	GO:0006002	fructose 6-phosphate metabolic process	0.06	0.3243	0.866	0.333	protein phosphorylation
39	GO:0009966	regulation of signal transduction	0.857	1.451	0.83	0.496	protein phosphorylation
40	GO:0009408	response to heat	0.166	0.3476	0.947	0.577	protein phosphorylation
41	GO:0009451	RNA modification	1.778	0.4808	0.778	0.581	protein phosphorylation
42	GO:0016485	protein processing	0.211	1.301	0.884	0.294	protein phosphorylation
43	GO:0006508	proteolysis	5.223	5.5901	0.853	0.448	protein phosphorylation
44	GO:0006909	phagocytosis	0.051	0.4021	0.853	0.651	protein phosphorylation
45	GO:0019627	urea metabolic process	0.051	1.1772	0.754	0.33	protein phosphorylation
46	GO:0006486	protein glycosylation	0.317	3.7959	0.706	0.529	protein phosphorylation
47	GO:0042450	arginine biosynthetic process via ornithine	0.041	0.8908	0.688	0.461	protein phosphorylation
48	GO:0006812	cation transport	3.242	8.7447	0.876	0	cation transport
49	GO:0055085	transmembrane transport	8.916	1.9626	0.901	0.535	cation transport
50	GO:0006813	potassium ion transport	0.476	1.5467	0.88	0.681	cation transport
51	GO:0006810	transport	17.616	0.8368	0.895	0.684	cation transport
52	GO:0006811	ion transport	5.344	2.0362	0.906	0.45	cation transport
53	GO:0015914	phospholipid transport	0.076	4.7986	0.823	0.522	cation transport
54	GO:0035434	copper ion transmembrane transport	0.038	0.9606	0.897	0.49	cation transport
55	GO:0008272	sulfate transport	0.15	0.4595	0.827	0.563	cation transport
56	GO:0015770	sucrose transport	0.004	1.644	0.877	0.212	cation transport
57	GO:0032065	cortical protein anchoring	0.007	0.6517	0.787	0.426	cation transport
58	GO:0070588	calcium ion transmembrane transport	0.157	8.0804	0.882	0.561	cation transport
59	GO:0016973	poly(A)+ mRNA export from nucleus	0.023	0.7757	0.859	0.309	cation transport
60	GO:0007155	cell adhesion	0.544	0.7293	0.99	0	cell adhesion
61	GO:0008152	metabolic process	75.387	2.6676	0.997	0	metabolism
62	GO:0015976	carbon utilization	0.04	1.5229	0.926	0	carbon utilization
63	GO:0043086	negative regulation of catalytic activity	0.4	2.7595	0.947	0	negative regulation of catalytic activity
64	GO:0042549	photosystem II stabilization	0.005	0.6187	0.904	0.164	negative regulation of catalytic activity
65	GO:0006885	regulation of pH	0.066	1.301	0.948	0.196	negative regulation of catalytic activity
66	GO:0007275	multicellular organism development	1.559	0.4113	0.895	0.464	negative regulation of catalytic activity
67	GO:0045454	cell redox homeostasis	0.861	0.4143	0.784	0.668	negative regulation of catalytic activity
68	GO:0006520	cellular amino acid metabolic process	5.591	0.6633	0.636	0.537	negative regulation of catalytic activity
69	GO:0000079	regulation of cyclin-dependent protein serine/threonine kinase activity	0.063	1.1427	0.718	0.634	negative regulation of catalytic activity
70	GO:0006099	tricarboxylic acid cycle	0.469	0.4522	0.717	0.507	negative regulation of catalytic activity
71	GO:0007050	cell cycle arrest	0.04	0.8794	0.81	0.682	negative regulation of catalytic activity
72	GO:0009934	regulation of meristem structural organization	0.001	2.5243	0.915	0.15	negative regulation of catalytic activity
73	GO:0006334	nucleosome assembly	0.089	2.158	0.864	0.032	nucleosome assembly
74	GO:0042545	cell wall modification	0.045	0.3787	0.898	0.619	nucleosome assembly
75	GO:0006265	DNA topological change	0.268	0.9622	0.754	0.692	nucleosome assembly
76	GO:0016043	cellular component organization	7.239	1.3478	0.861	0.657	nucleosome assembly
77	GO:0051276	chromosome organization	1.477	1.0904	0.861	0.57	nucleosome assembly
78	GO:0006325	chromatin organization	0.668	0.8289	0.869	0.607	nucleosome assembly
79	GO:0009664	plant-type cell wall organization	0.028	1.3391	0.901	0.32	nucleosome assembly
80	GO:0007030	Golgi organization	0.039	0.8289	0.893	0.431	nucleosome assembly
81	GO:0030036	actin cytoskeleton organization	0.381	0.7373	0.757	0.655	nucleosome assembly
82	GO:0009058	biosynthetic process	31.611	6.5143	0.965	0.032	biosynthesis
83	GO:0006457	protein folding	0.903	0.4242	0.948	0.041	protein folding
84	GO:0015995	chlorophyll biosynthetic process	0.039	3.3468	0.725	0.054	chlorophyll biosynthesis
85	GO:0006777	Mo-molybdopterin cofactor biosynthetic process	0.198	0.4343	0.727	0.538	chlorophyll biosynthesis
86	GO:0019307	mannose biosynthetic process	0	0.7293	0.811	0.377	chlorophyll biosynthesis
87	GO:0048544	recognition of pollen	0.034	0.8289	0.83	0.671	chlorophyll biosynthesis
88	GO:0016051	carbohydrate biosynthetic process	1.079	2.1397	0.7	0.638	chlorophyll biosynthesis
89	GO:0055114	oxidation-reduction process	15.06	1.301	0.806	0.3	chlorophyll biosynthesis
90	GO:0016114	terpenoid biosynthetic process	0.245	1.9431	0.724	0.295	chlorophyll biosynthesis
91	GO:0044262	cellular carbohydrate metabolic process	1.257	0.7652	0.836	0.473	chlorophyll biosynthesis
92	GO:0006650	glycerophospholipid metabolic process	0.543	1.8827	0.728	0.626	chlorophyll biosynthesis
93	GO:0006168	adenine salvage	0.032	0.536	0.712	0.677	chlorophyll biosynthesis
94	GO:0006662	glycerol ether metabolic process	0.122	1.3872	0.807	0.156	chlorophyll biosynthesis
95	GO:0006672	ceramide metabolic process	0.041	0.8289	0.745	0.508	chlorophyll biosynthesis
96	GO:0006694	steroid biosynthetic process	0.122	0.4708	0.757	0.593	chlorophyll biosynthesis
97	GO:0009688	abscisic acid biosynthetic process	0.001	0.9654	0.736	0.689	chlorophyll biosynthesis
98	GO:0009690	cytokinin metabolic process	0.04	0.3734	0.803	0.682	chlorophyll biosynthesis
99	GO:0006729	tetrahydrobiopterin biosynthetic process	0.032	0.7757	0.807	0.439	chlorophyll biosynthesis
100	GO:0042176	regulation of protein catabolic process	0.112	0.3356	0.818	0.677	chlorophyll biosynthesis
101	GO:0000910	cytokinesis	0.315	1.4868	0.804	0.677	chlorophyll biosynthesis
102	GO:0006208	pyrimidine nucleobase catabolic process	0.005	1.1772	0.747	0.194	chlorophyll biosynthesis
103	GO:0006032	chitin catabolic process	0.018	0.3462	0.802	0.474	chlorophyll biosynthesis
104	GO:0008295	spermidine biosynthetic process	0.055	0.6893	0.804	0.219	chlorophyll biosynthesis
105	GO:0045132	meiotic chromosome segregation	0.05	0.8908	0.766	0.594	chlorophyll biosynthesis
106	GO:0006013	mannose metabolic process	0.031	0.6517	0.763	0.613	chlorophyll biosynthesis
107	GO:0006014	D-ribose metabolic process	0.057	1.4168	0.754	0.486	chlorophyll biosynthesis
108	GO:0030163	protein catabolic process	0.997	0.3319	0.823	0.584	chlorophyll biosynthesis
109	GO:0009813	flavonoid biosynthetic process	0.016	0.536	0.913	0.1	chlorophyll biosynthesis
110	GO:0006629	lipid metabolic process	3.522	1.7496	0.815	0.14	chlorophyll biosynthesis
111	GO:0008219	cell death	0.458	1.8761	0.829	0.166	chlorophyll biosynthesis
112	GO:0000086	G2/M transition of mitotic cell cycle	0.052	2.5243	0.834	0.139	chlorophyll biosynthesis
113	GO:0006075	(1-&gt;3)-beta-D-glucan biosynthetic process	0.015	2.06	0.718	0.654	chlorophyll biosynthesis
114	GO:0006071	glycerol metabolic process	0.11	2.4145	0.706	0.607	chlorophyll biosynthesis
115	GO:0007017	microtubule-based process	0.658	0.3956	0.824	0.18	chlorophyll biosynthesis
116	GO:0007018	microtubule-based movement	0.287	2.8794	0.828	0.136	chlorophyll biosynthesis
117	GO:0017001	antibiotic catabolic process	0.019	0.8908	0.894	0.36	chlorophyll biosynthesis
118	GO:0005992	trehalose biosynthetic process	0.06	2.4815	0.707	0.259	chlorophyll biosynthesis
119	GO:0006000	fructose metabolic process	0.022	0.8289	0.768	0.601	chlorophyll biosynthesis
120	GO:0046274	lignin catabolic process	0.01	0.5033	0.8	0.463	chlorophyll biosynthesis
121	GO:0006801	superoxide metabolic process	0.144	1.2916	0.929	0.061	superoxide metabolism
122	GO:0008283	cell proliferation	0.394	0.3734	0.914	0.061	cell proliferation
123	GO:0015979	photosynthesis	0.183	0.6686	0.928	0.063	photosynthesis
124	GO:0006807	nitrogen compound metabolic process	38.744	0.3117	0.965	0.066	nitrogen compound metabolism
125	GO:0006790	sulfur compound metabolic process	1.822	0.536	0.913	0.083	sulfur compound metabolism
126	GO:0005975	carbohydrate metabolic process	5.26	5.1475	0.916	0.094	carbohydrate metabolism
127	GO:0015977	carbon fixation	0.036	0.3243	0.873	0.1	carbon fixation

## Sheet: Sheet3
Gene ontology terms obtained for ascending MEGs of ZY821 cultivar
term_ID	description	freqInDbPercent	abslog10pvalue	uniqueness	dispensability	representative
1	GO:0006772	thiamine metabolic process	0.252	3.7959	0.73	0	thiamine metabolism
2	GO:0048034	heme O biosynthetic process	0.029	1.1818	0.744	0.662	thiamine metabolism
3	GO:0051205	protein insertion into membrane	0.111	1.3546	0.676	0.325	thiamine metabolism
4	GO:0017038	protein import	0.257	1.0128	0.788	0.57	thiamine metabolism
5	GO:0045132	meiotic chromosome segregation	0.05	1.0128	0.766	0.571	thiamine metabolism
6	GO:0006013	mannose metabolic process	0.031	1.7747	0.816	0.228	thiamine metabolism
7	GO:0009239	enterobactin biosynthetic process	0.006	1.475	0.763	0.221	thiamine metabolism
8	GO:0048268	clathrin coat assembly	0.018	0.6853	0.873	0.489	thiamine metabolism
9	GO:0030418	nicotianamine biosynthetic process	0.003	0.5787	0.773	0.692	thiamine metabolism
10	GO:0051013	microtubule severing	0.008	0.6737	0.88	0.122	thiamine metabolism
11	GO:0006364	rRNA processing	0.952	2.2328	0.67	0.656	thiamine metabolism
12	GO:0006357	regulation of transcription from RNA polymerase II promoter	1.273	1.0915	0.729	0.395	thiamine metabolism
13	GO:0016070	RNA metabolic process	15.951	0.4274	0.749	0.459	thiamine metabolism
14	GO:0032065	cortical protein anchoring	0.007	0.7678	0.754	0.503	thiamine metabolism
15	GO:0006383	transcription from RNA polymerase III promoter	0.079	1.0883	0.8	0.244	thiamine metabolism
16	GO:0006108	malate metabolic process	0.088	0.613	0.802	0.333	thiamine metabolism
17	GO:0006855	drug transmembrane transport	0.189	0.4117	0.792	0.434	thiamine metabolism
18	GO:0006102	isocitrate metabolic process	0.022	0.7022	0.813	0.301	thiamine metabolism
19	GO:0010380	regulation of chlorophyll biosynthetic process	0.001	1.0883	0.779	0.54	thiamine metabolism
20	GO:0000105	histidine biosynthetic process	0.36	0.3142	0.712	0.601	thiamine metabolism
21	GO:0009059	macromolecule biosynthetic process	19.548	0.8952	0.816	0.17	thiamine metabolism
22	GO:0006637	acyl-CoA metabolic process	0.254	0.9496	0.839	0.657	thiamine metabolism
23	GO:0007050	cell cycle arrest	0.04	0.4337	0.811	0.584	thiamine metabolism
24	GO:0007049	cell cycle	1.885	0.4466	0.828	0.223	thiamine metabolism
25	GO:0006627	protein processing involved in protein targeting to mitochondrion	0.016	0.8477	0.668	0.528	thiamine metabolism
26	GO:0006625	protein targeting to peroxisome	0.043	0.8477	0.742	0.641	thiamine metabolism
27	GO:0009072	aromatic amino acid family metabolic process	0.719	0.6472	0.723	0.486	thiamine metabolism
28	GO:0044267	cellular protein metabolic process	14.293	0.4196	0.783	0.404	thiamine metabolism
29	GO:0051301	cell division	1.23	0.8477	0.834	0.18	thiamine metabolism
30	GO:0006887	exocytosis	0.21	0.656	0.745	0.41	thiamine metabolism
31	GO:0006072	glycerol-3-phosphate metabolic process	0.121	0.4095	0.853	0.505	thiamine metabolism
32	GO:0006412	translation	5.686	2.1113	0.663	0.696	thiamine metabolism
33	GO:0016117	carotenoid biosynthetic process	0.03	1.983	0.77	0.133	thiamine metabolism
34	GO:0009081	branched-chain amino acid metabolic process	0.463	0.3769	0.743	0.528	thiamine metabolism
35	GO:0006413	translational initiation	0.518	0.3897	0.725	0.534	thiamine metabolism
36	GO:0006414	translational elongation	0.777	1.098	0.716	0.368	thiamine metabolism
37	GO:0006396	RNA processing	3.21	1.3429	0.764	0.346	thiamine metabolism
38	GO:0006189	de novo' IMP biosynthetic process	0.398	1.3161	0.663	0.632	thiamine metabolism
39	GO:0008380	RNA splicing	0.413	2.6421	0.775	0.149	thiamine metabolism
40	GO:0046474	glycerophospholipid biosynthetic process	0.266	1.6459	0.709	0.537	thiamine metabolism
41	GO:0046939	nucleotide phosphorylation	0.792	1.0419	0.688	0.684	thiamine metabolism
42	GO:0006397	mRNA processing	0.561	1.4353	0.767	0.677	thiamine metabolism
43	GO:0019674	NAD metabolic process	0.308	0.6737	0.679	0.615	thiamine metabolism
44	GO:0008643	carbohydrate transport	0.682	0.4603	0.789	0.484	thiamine metabolism
45	GO:0009116	nucleoside metabolic process	2.917	1.6364	0.665	0.337	thiamine metabolism
46	GO:0000162	tryptophan biosynthetic process	0.191	1.1209	0.71	0.275	thiamine metabolism
47	GO:0006421	asparaginyl-tRNA aminoacylation	0.029	0.5787	0.687	0.569	thiamine metabolism
48	GO:0046907	intracellular transport	1.564	0.5586	0.832	0.696	thiamine metabolism
49	GO:0006435	threonyl-tRNA aminoacylation	0.053	0.8055	0.675	0.436	thiamine metabolism
50	GO:0006433	prolyl-tRNA aminoacylation	0.052	0.5586	0.676	0.591	thiamine metabolism
51	GO:0008610	lipid biosynthetic process	2.123	0.6388	0.749	0.66	thiamine metabolism
52	GO:0006002	fructose 6-phosphate metabolic process	0.06	0.4212	0.86	0.472	thiamine metabolism
53	GO:0000910	cytokinesis	0.315	0.4095	0.812	0.674	thiamine metabolism
54	GO:0008615	pyridoxine biosynthetic process	0.089	1.0883	0.718	0.67	thiamine metabolism
55	GO:0000917	barrier septum assembly	0.028	1.9318	0.772	0.132	thiamine metabolism
56	GO:0019370	leukotriene biosynthetic process	0.003	1.0883	0.783	0.405	thiamine metabolism
57	GO:0000244	spliceosomal tri-snRNP complex assembly	0.01	0.8952	0.758	0.454	thiamine metabolism
58	GO:0046836	glycolipid transport	0.014	0.3982	0.827	0.433	thiamine metabolism
59	GO:0006909	phagocytosis	0.051	0.5054	0.827	0.651	thiamine metabolism
60	GO:0006885	regulation of pH	0.066	1.5346	0.945	0	regulation of pH
61	GO:0006302	double-strand break repair	0.211	0.8477	0.786	0.432	regulation of pH
62	GO:0031047	gene silencing by RNA	0.089	0.9496	0.778	0.574	regulation of pH
63	GO:0006265	DNA topological change	0.268	0.6853	0.736	0.45	regulation of pH
64	GO:0016043	cellular component organization	7.239	1.1261	0.831	0.526	regulation of pH
65	GO:0006289	nucleotide-excision repair	0.31	0.6243	0.78	0.623	regulation of pH
66	GO:0009584	detection of visible light	0.021	0.7335	0.957	0.304	regulation of pH
67	GO:0042127	regulation of cell proliferation	0.313	1.0883	0.884	0.223	regulation of pH
68	GO:0043066	negative regulation of apoptotic process	0.173	1.0883	0.831	0.184	regulation of pH
69	GO:0009611	response to wounding	0.127	0.7335	0.946	0.459	regulation of pH
70	GO:0000160	phosphorelay signal transduction system	2.57	0.9905	0.828	0.287	regulation of pH
71	GO:0009607	response to biotic stimulus	0.342	0.4136	0.951	0.395	regulation of pH
72	GO:0006952	defense response	0.568	0.31	0.941	0.519	regulation of pH
73	GO:0030036	actin cytoskeleton organization	0.381	0.6472	0.765	0.558	regulation of pH
74	GO:0008152	metabolic process	75.387	0.871	0.996	0	metabolism
75	GO:0070588	calcium ion transmembrane transport	0.157	1.5258	0.855	0	calcium ion transmembrane transport
76	GO:0055085	transmembrane transport	8.916	0.6517	0.856	0.322	calcium ion transmembrane transport
77	GO:0006817	phosphate ion transport	0.242	0.5222	0.869	0.557	calcium ion transmembrane transport
78	GO:0006820	anion transport	1.956	0.871	0.846	0.534	calcium ion transmembrane transport
79	GO:0006814	sodium ion transport	0.305	1.3251	0.855	0.656	calcium ion transmembrane transport
80	GO:0006811	ion transport	5.344	0.4417	0.862	0.535	calcium ion transmembrane transport
81	GO:0015770	sucrose transport	0.004	0.4603	0.847	0.173	calcium ion transmembrane transport
82	GO:0006826	iron ion transport	0.133	0.7335	0.863	0.615	calcium ion transmembrane transport
83	GO:0032259	methylation	3.103	0.7547	0.967	0.015	methylation
84	GO:0009813	flavonoid biosynthetic process	0.016	0.6472	0.916	0.03	flavonoid biosynthesis
85	GO:0016598	protein arginylation	0.017	2.3893	0.807	0.041	protein arginylation
86	GO:0016567	protein ubiquitination	0.523	1.1518	0.802	0.339	protein arginylation
87	GO:0018298	protein-chromophore linkage	0.095	0.7335	0.825	0.387	protein arginylation
88	GO:0030245	cellulose catabolic process	0.06	1.1818	0.818	0.479	protein arginylation
89	GO:0018343	protein farnesylation	0.009	1.0883	0.849	0.262	protein arginylation
90	GO:0006470	protein dephosphorylation	0.585	0.3672	0.755	0.455	protein arginylation
91	GO:0016998	cell wall macromolecule catabolic process	0.059	0.331	0.859	0.41	protein arginylation
92	GO:0006479	protein methylation	0.343	0.6478	0.792	0.432	protein arginylation
93	GO:0017006	protein-tetrapyrrole linkage	0.024	0.8055	0.84	0.347	protein arginylation
94	GO:0006464	cellular protein modification process	7.726	0.3524	0.748	0.614	protein arginylation
95	GO:0005986	sucrose biosynthetic process	0.003	0.6227	0.801	0.488	protein arginylation
96	GO:0006801	superoxide metabolic process	0.144	0.3479	0.924	0.048	superoxide metabolism
97	GO:0015979	photosynthesis	0.183	0.3211	0.923	0.048	photosynthesis
98	GO:0008283	cell proliferation	0.394	0.4746	0.924	0.071	cell proliferation

## Sheet: Sheet4
Gene ontology terms obtained for descending MEGs of ZY821 cultivar
term_ID	description	freqInDbPercent	abslog10pvalue	uniqueness	dispensability	representative
1	GO:0006184	(obsolete) GTP catabolic process	0.143	0.8259	0.983	0	(obsolete) GTP catabolism
2	GO:0008152	metabolic process	75.387	1.3605	0.996	0	metabolism
3	GO:0008610	lipid biosynthetic process	2.123	3.2526	0.733	0	lipid biosynthesis
4	GO:0006783	heme biosynthetic process	0.244	1.1118	0.742	0.401	lipid biosynthesis
5	GO:0006066	alcohol metabolic process	0.422	1.5575	0.791	0.169	lipid biosynthesis
6	GO:0006537	glutamate biosynthetic process	0.088	0.8038	0.708	0.7	lipid biosynthesis
7	GO:0006525	arginine metabolic process	0.386	1.2328	0.711	0.291	lipid biosynthesis
8	GO:0019307	mannose biosynthetic process	0	1.063	0.833	0.328	lipid biosynthesis
9	GO:0016042	lipid catabolic process	0.401	0.7395	0.755	0.689	lipid biosynthesis
10	GO:0006562	proline catabolic process	0.033	1.1118	0.705	0.649	lipid biosynthesis
11	GO:0048544	recognition of pollen	0.034	0.9144	0.823	0.602	lipid biosynthesis
12	GO:0006012	galactose metabolic process	0.109	0.5382	0.776	0.578	lipid biosynthesis
13	GO:0008202	steroid metabolic process	0.161	1.5272	0.811	0.628	lipid biosynthesis
14	GO:0019752	carboxylic acid metabolic process	8.831	0.8286	0.678	0.562	lipid biosynthesis
15	GO:0006099	tricarboxylic acid cycle	0.469	0.6293	0.741	0.405	lipid biosynthesis
16	GO:0006629	lipid metabolic process	3.522	1.2226	0.818	0.218	lipid biosynthesis
17	GO:0009311	oligosaccharide metabolic process	0.342	1.1675	0.807	0.165	lipid biosynthesis
18	GO:0016114	terpenoid biosynthetic process	0.245	0.7597	0.748	0.655	lipid biosynthesis
19	GO:0009094	L-phenylalanine biosynthetic process	0.044	0.6851	0.725	0.482	lipid biosynthesis
20	GO:0046938	phytochelatin biosynthetic process	0.005	2.0757	0.801	0.287	lipid biosynthesis
21	GO:0007275	multicellular organism development	1.559	0.9281	0.88	0.102	lipid biosynthesis
22	GO:0006400	tRNA modification	0.914	0.7809	0.808	0.589	lipid biosynthesis
23	GO:0006144	purine nucleobase metabolic process	0.203	1.3098	0.747	0.275	lipid biosynthesis
24	GO:0030244	cellulose biosynthetic process	0.025	1.0706	0.75	0.518	lipid biosynthesis
25	GO:0006436	tryptophanyl-tRNA aminoacylation	0.054	0.8539	0.702	0.416	lipid biosynthesis
26	GO:0009972	cytidine deamination	0.027	1.063	0.723	0.397	lipid biosynthesis
27	GO:0006730	one-carbon metabolic process	0.328	0.5277	0.78	0.286	lipid biosynthesis
28	GO:0006744	ubiquinone biosynthetic process	0.136	0.7203	0.741	0.553	lipid biosynthesis
29	GO:0009446	putrescine biosynthetic process	0.021	1.1118	0.827	0.135	lipid biosynthesis
30	GO:0015969	guanosine tetraphosphate metabolic process	0.065	0.9442	0.739	0.521	lipid biosynthesis
31	GO:0046854	phosphatidylinositol phosphorylation	0.173	0.5777	0.762	0.632	lipid biosynthesis
32	GO:0046034	ATP metabolic process	1.263	1.2976	0.676	0.667	lipid biosynthesis
33	GO:0009607	response to biotic stimulus	0.342	2.8447	0.927	0	response to biotic stimulus
34	GO:0006298	mismatch repair	0.165	0.5605	0.81	0.38	response to biotic stimulus
35	GO:0035556	intracellular signal transduction	4	0.5717	0.783	0.635	response to biotic stimulus
36	GO:0006855	drug transmembrane transport	0.189	0.3653	0.774	0.523	response to biotic stimulus
37	GO:0007264	small GTPase mediated signal transduction	0.485	0.4418	0.819	0.503	response to biotic stimulus
38	GO:0010038	response to metal ion	0.132	1.9626	0.927	0.3	response to biotic stimulus
39	GO:0006952	defense response	0.568	0.3044	0.921	0.509	response to biotic stimulus
40	GO:0009966	regulation of signal transduction	0.857	0.5844	0.81	0.354	response to biotic stimulus
41	GO:0007205	protein kinase C-activating G-protein coupled receptor signaling pathway	0.018	0.4628	0.854	0.38	response to biotic stimulus
42	GO:0007186	G-protein coupled receptor signaling pathway	0.882	0.3838	0.81	0.638	response to biotic stimulus
43	GO:0009987	cellular process	63.78	0.3966	0.994	0	cellular process
44	GO:0016192	vesicle-mediated transport	1.085	2.202	0.893	0	vesicle-mediated transport
45	GO:0015991	ATP hydrolysis coupled proton transport	0.163	2.0052	0.797	0.608	vesicle-mediated transport
46	GO:0006820	anion transport	1.956	0.5077	0.858	0.597	vesicle-mediated transport
47	GO:0006810	transport	17.616	0.6176	0.867	0.462	vesicle-mediated transport
48	GO:0015770	sucrose transport	0.004	0.6531	0.844	0.393	vesicle-mediated transport
49	GO:0071805	potassium ion transmembrane transport	0.331	0.9161	0.723	0.661	vesicle-mediated transport
50	GO:0006821	chloride transport	0.117	0.6238	0.881	0.637	vesicle-mediated transport
51	GO:0006857	oligopeptide transport	0.057	0.8706	0.886	0.619	vesicle-mediated transport
52	GO:0006627	protein processing involved in protein targeting to mitochondrion	0.016	1.063	0.711	0.624	vesicle-mediated transport
53	GO:0006625	protein targeting to peroxisome	0.043	1.063	0.781	0.675	vesicle-mediated transport
54	GO:0006886	intracellular protein transport	1.199	1.9431	0.843	0.32	vesicle-mediated transport
55	GO:0070588	calcium ion transmembrane transport	0.157	2.1255	0.864	0.261	vesicle-mediated transport
56	GO:0003333	amino acid transmembrane transport	0.475	1.1107	0.767	0.583	vesicle-mediated transport
57	GO:0006909	phagocytosis	0.051	1.6576	0.833	0.236	vesicle-mediated transport
58	GO:0006904	vesicle docking involved in exocytosis	0.06	0.4712	0.774	0.597	vesicle-mediated transport
59	GO:0042545	cell wall modification	0.045	1.5436	0.879	0	cell wall modification
60	GO:0016043	cellular component organization	7.239	0.3659	0.841	0.601	cell wall modification
61	GO:0048268	clathrin coat assembly	0.018	0.4099	0.882	0.448	cell wall modification
62	GO:0006338	chromatin remodeling	0.137	0.8539	0.861	0.697	cell wall modification
63	GO:0007030	Golgi organization	0.039	1.1675	0.878	0.313	cell wall modification
64	GO:0007010	cytoskeleton organization	0.786	0.5971	0.852	0.505	cell wall modification
65	GO:0030036	actin cytoskeleton organization	0.381	0.6028	0.76	0.616	cell wall modification
66	GO:0043044	ATP-dependent chromatin remodeling	0.046	1.2328	0.869	0.316	cell wall modification
67	GO:0009664	plant-type cell wall organization	0.028	0.521	0.882	0.619	cell wall modification
68	GO:0043086	negative regulation of catalytic activity	0.4	1.8761	0.942	0	negative regulation of catalytic activity
69	GO:0000103	sulfate assimilation	0.084	0.6238	0.945	0.022	sulfate assimilation
70	GO:0006457	protein folding	0.903	0.3083	0.942	0.028	protein folding
71	GO:0009058	biosynthetic process	31.611	0.4549	0.964	0.028	biosynthesis
72	GO:0019673	GDP-mannose metabolic process	0.048	1.1675	0.871	0.05	GDP-mannose metabolism
73	GO:0015976	carbon utilization	0.04	0.6101	0.922	0.07	carbon utilization
74	GO:0006468	protein phosphorylation	4.137	2.1656	0.769	0.082	protein phosphorylation
75	GO:0045116	protein neddylation	0.019	1.3098	0.861	0.401	protein phosphorylation
76	GO:0016310	phosphorylation	7.764	1.0482	0.865	0.615	protein phosphorylation
77	GO:0018279	protein N-linked glycosylation via asparagine	0.015	0.9801	0.773	0.394	protein phosphorylation
78	GO:0016598	protein arginylation	0.017	1.3098	0.814	0.589	protein phosphorylation
79	GO:0006396	RNA processing	3.21	0.5363	0.823	0.212	protein phosphorylation
80	GO:0046939	nucleotide phosphorylation	0.792	1.4413	0.711	0.588	protein phosphorylation
81	GO:0006139	nucleobase-containing compound metabolic process	26.547	0.4574	0.821	0.359	protein phosphorylation
82	GO:0042176	regulation of protein catabolic process	0.112	1.4976	0.809	0.276	protein phosphorylation
83	GO:0006508	proteolysis	5.223	2.4101	0.855	0.448	protein phosphorylation
84	GO:0006790	sulfur compound metabolic process	1.822	0.8539	0.912	0.083	sulfur compound metabolism
85	GO:0007018	microtubule-based movement	0.287	0.9678	0.84	0.084	microtubule-based movement
86	GO:0008219	cell death	0.458	0.3546	0.835	0.166	microtubule-based movement
87	GO:0044237	cellular metabolic process	53.061	1.8665	0.917	0.085	cellular metabolism
88	GO:0005975	carbohydrate metabolic process	5.26	0.8661	0.918	0.094	carbohydrate metabolism
